# Supplementary material
Source: Royal Society of Chemistry journal article supplement (doi:10.1039/d6md00076b)
Supplement: d6md00076b1.pdf [file d6md00076b1.pdf]

## **A Comprehensive Study of Novel Pregnenolone-Isoxazole Hybrids as Selective Inducers of Mitochondrial Apoptosis in Breast Cancer Cells**

Victoria Malakhova,<sup>1</sup> Alexander Scherbakov,<sup>2,3</sup> Diana Salnikova,<sup>1,2,3</sup> Alvina Khamidullina,<sup>1,4,5</sup> Danila Sorokin,<sup>2</sup>  
Dmitry Vasilenko,<sup>6</sup> Elena Chernoburova,<sup>1</sup> Elena Averina,<sup>6</sup> Igor Zavarzin,<sup>1</sup> and Yulia Volkova<sup>1\*</sup>

1 - N.D. Zelinsky Institute of Organic Chemistry, Russian Academy of Sciences, Leninsky prospect 47, Moscow 119991, Russia.

2 - Department of Experimental Tumor Biology, Institute of Experimental Oncology and Carcinogenesis, N.N. Blokhin National Medical Research Center of Oncology of the Ministry of Health of Russia; Kashirskoe shosse 24, Moscow 115522, Russia.

3 - Gause Institute of New Antibiotics, Bol'shaya Pirogovskaya ulitsa 11, Moscow 119021, Russia.

4 - Laboratory of Molecular Oncobiology, Institute of Gene Biology, Russian Academy of Sciences, ulitsa Vavilova 34/5, Moscow 119334, Russia.

5 - Ufa Institute of Chemistry, Ufa Federal Research Center of the RAS, prospect Octyabrya 71, Ufa 450054, Russia.

6 - Department of Chemistry, Lomonosov Moscow State University, Leninskie Gory, 1-3, Moscow, 119991 Russia.

\* Corresponding author: [yavolkova@gmail.com](mailto:yavolkova@gmail.com), [yavolkova@ioc.ac.ru](mailto:yavolkova@ioc.ac.ru), Dr. Yulia Volkova Ph.D., Doctor of Sciences (Habil.), Senior researcher at N. D. Zelinsky Institute of Organic Chemistry ORCID 0000-0001-8554-838X

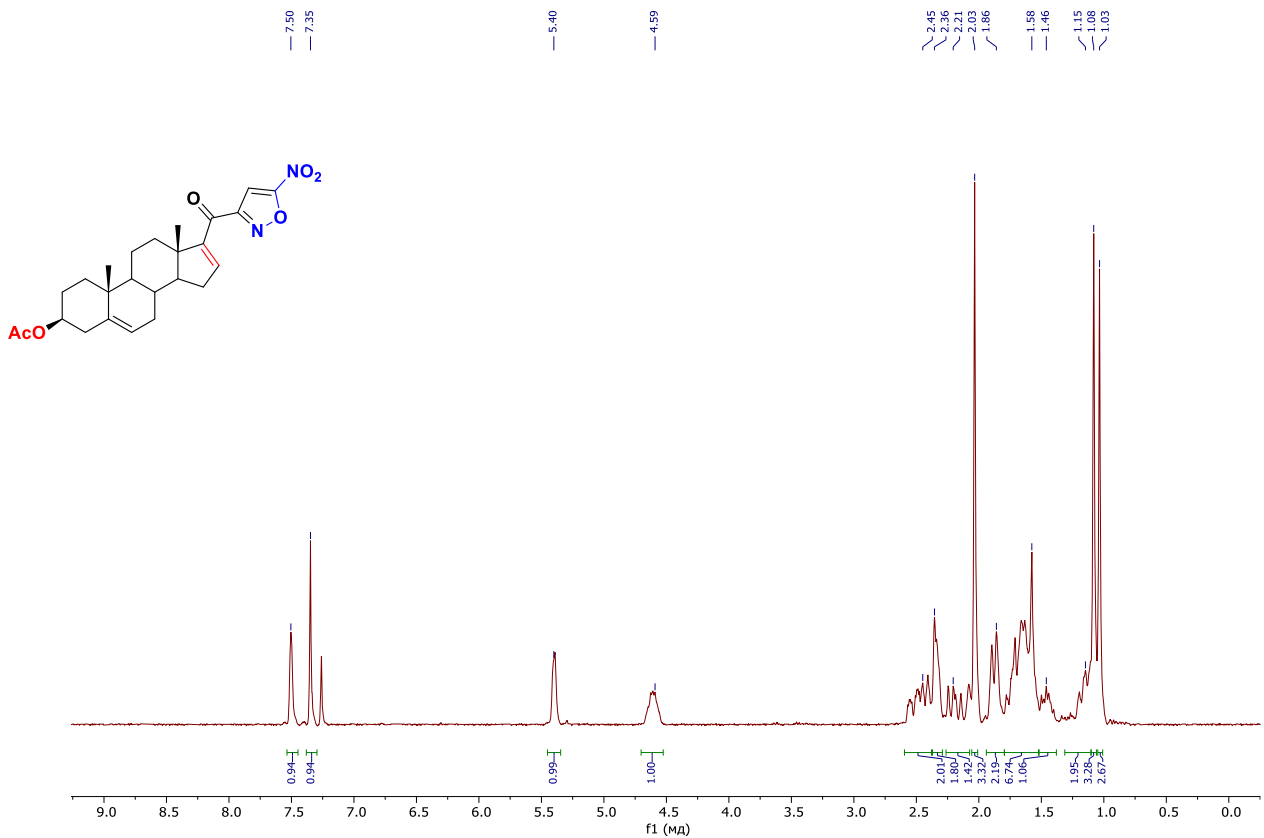

<sup>1</sup>H NMR (CDCl<sub>3</sub>, 300 MHz) spectrum of 3-acetate 21-(5-nitroisoxazole)-pregna-5,16-dien-3 $\beta$ -ol-20-one (**2a**)

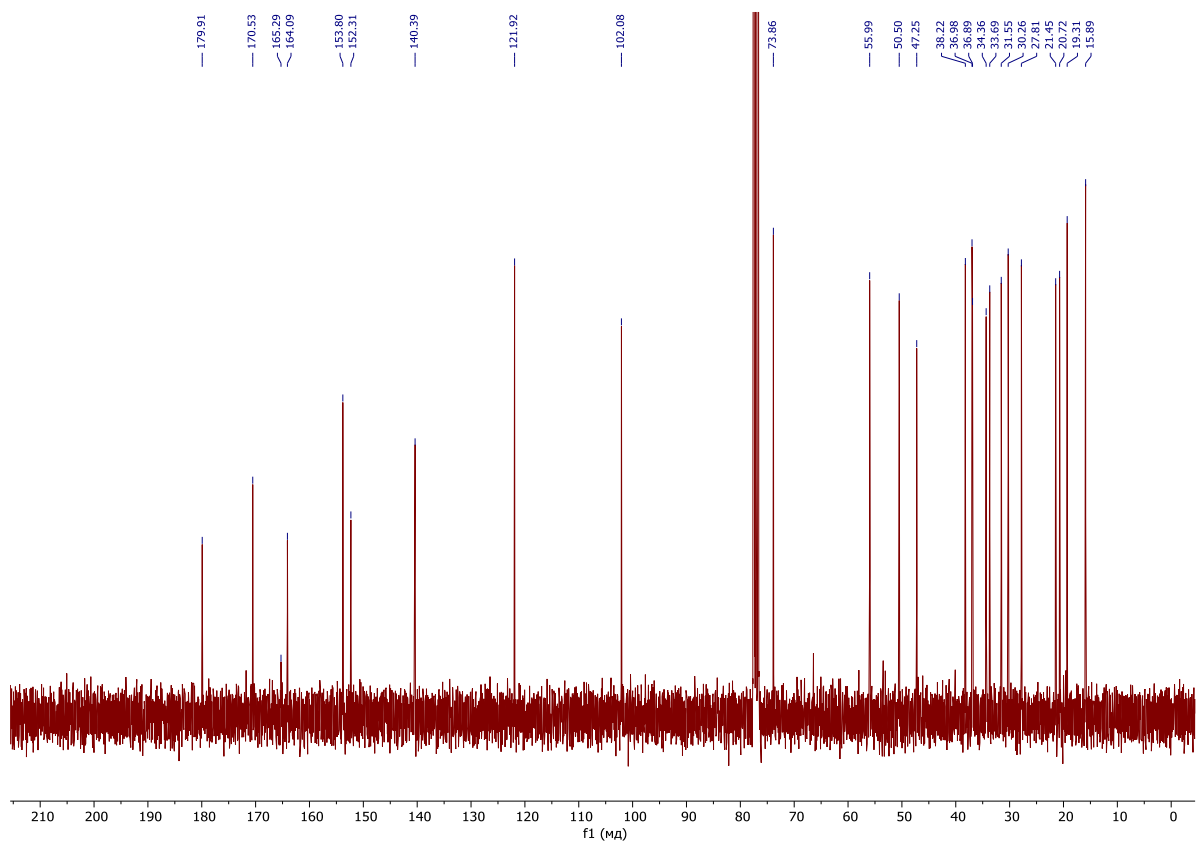

<sup>13</sup>C NMR (CDCl<sub>3</sub>, 75 MHz) spectrum of 3-acetate 21-(5-nitroisoxazole)-pregna-5,16-dien-3 $\beta$ -ol-20-one (**2a**)

**Analysis Info**

Analysis Name D:\Data\Kolotyrkina\2022\Malahova\0216028.d  
Method tune\_50-1600\_pos\_15\_12.m  
Sample Name /YUVA MaVi-024f1  
Comment C25H30N2O6 mH 455.2176 clb added CH3OH

Acquisition Date 16.02.2022 15:59:29

Operator BDAL@DE  
Instrument / Ser# micrOTOF 10248

**Acquisition Parameter**

|             |            |                      |          |                  |           |
|-------------|------------|----------------------|----------|------------------|-----------|
| Source Type | ESI        | Ion Polarity         | Positive | Set Nebulizer    | 0.4 Bar   |
| Focus       | Not active |                      |          | Set Dry Heater   | 180 °C    |
| Scan Begin  | 50 m/z     | Set Capillary        | 4500 V   | Set Dry Gas      | 4.0 l/min |
| Scan End    | 1600 m/z   | Set End Plate Offset | -500 V   | Set Divert Valve | Waste     |

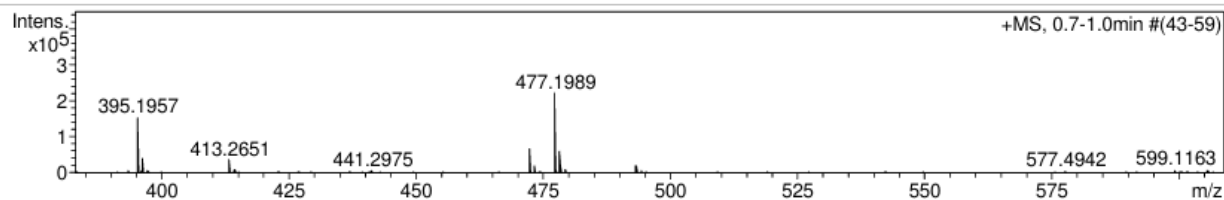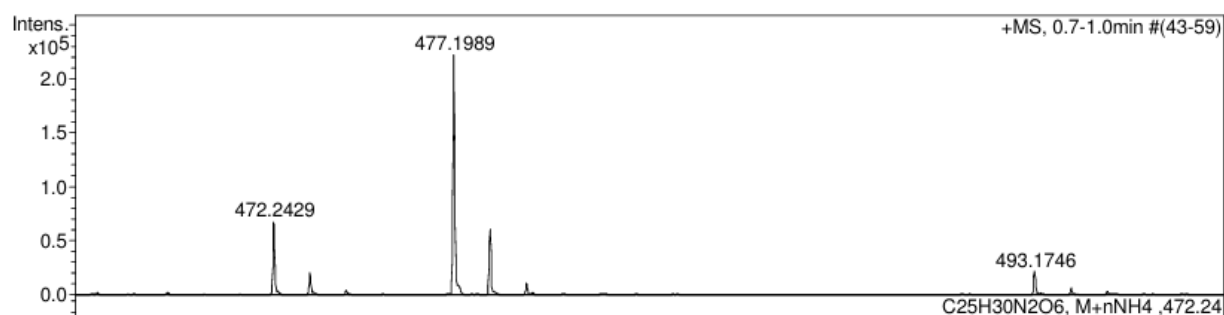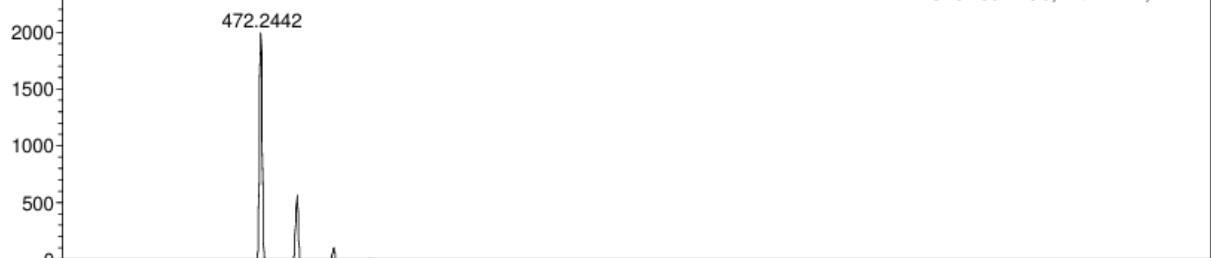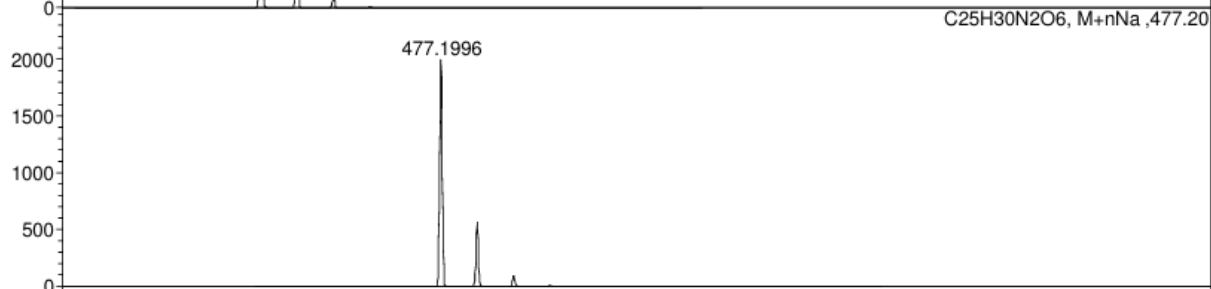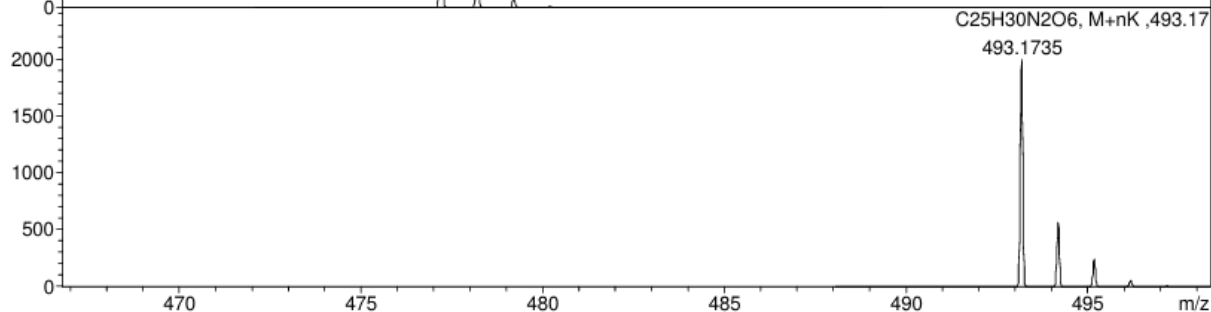

HRMS (ESI/Q-TOF) of 3-acetate 21-(5-nitroisoxazole)-pregna-5,16-dien-3 $\beta$ -ol-20-one (**2a**)

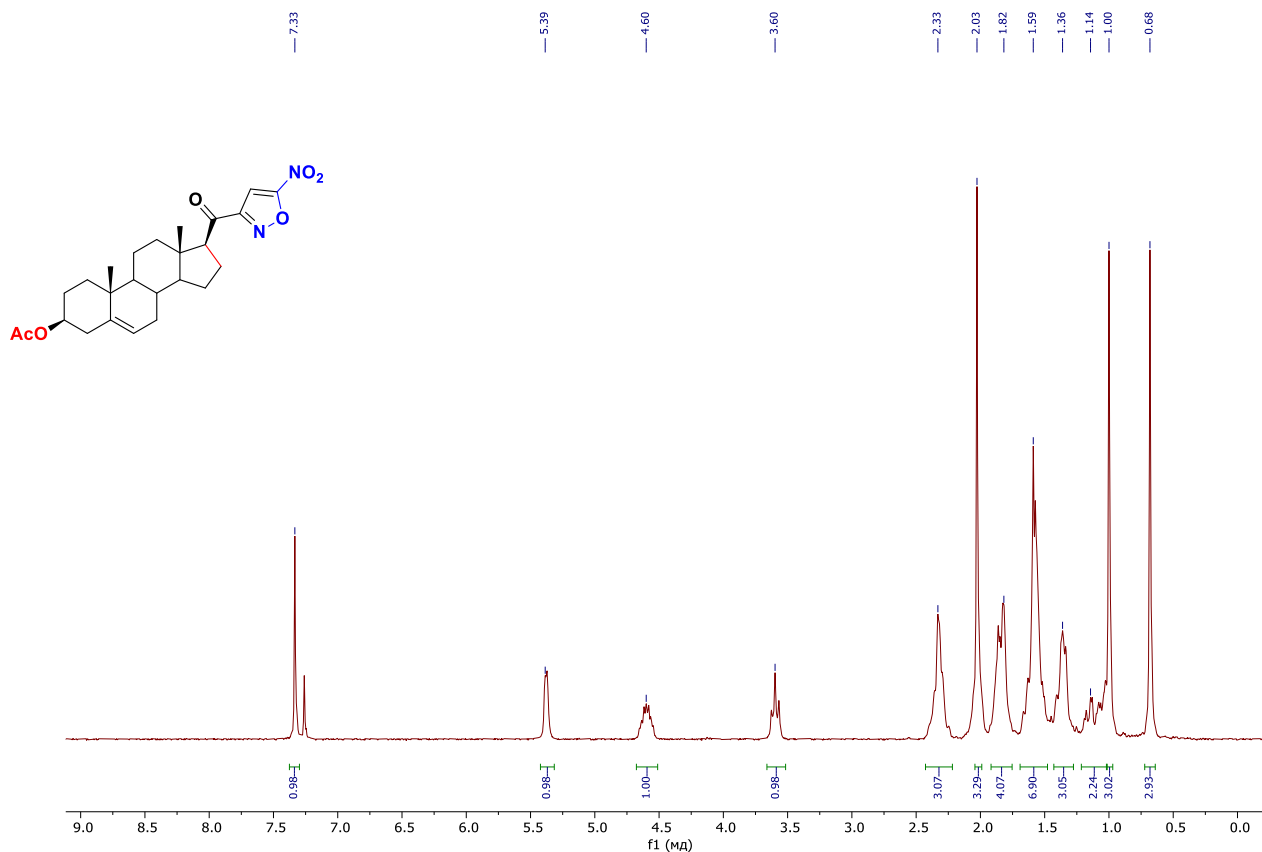

<sup>1</sup>H NMR (CDCl<sub>3</sub>, 300 MHz) spectrum of 3-acetate 21-(5-nitroisoxazole)-pregna-5-en-3β-ol-20-one (**2b**)

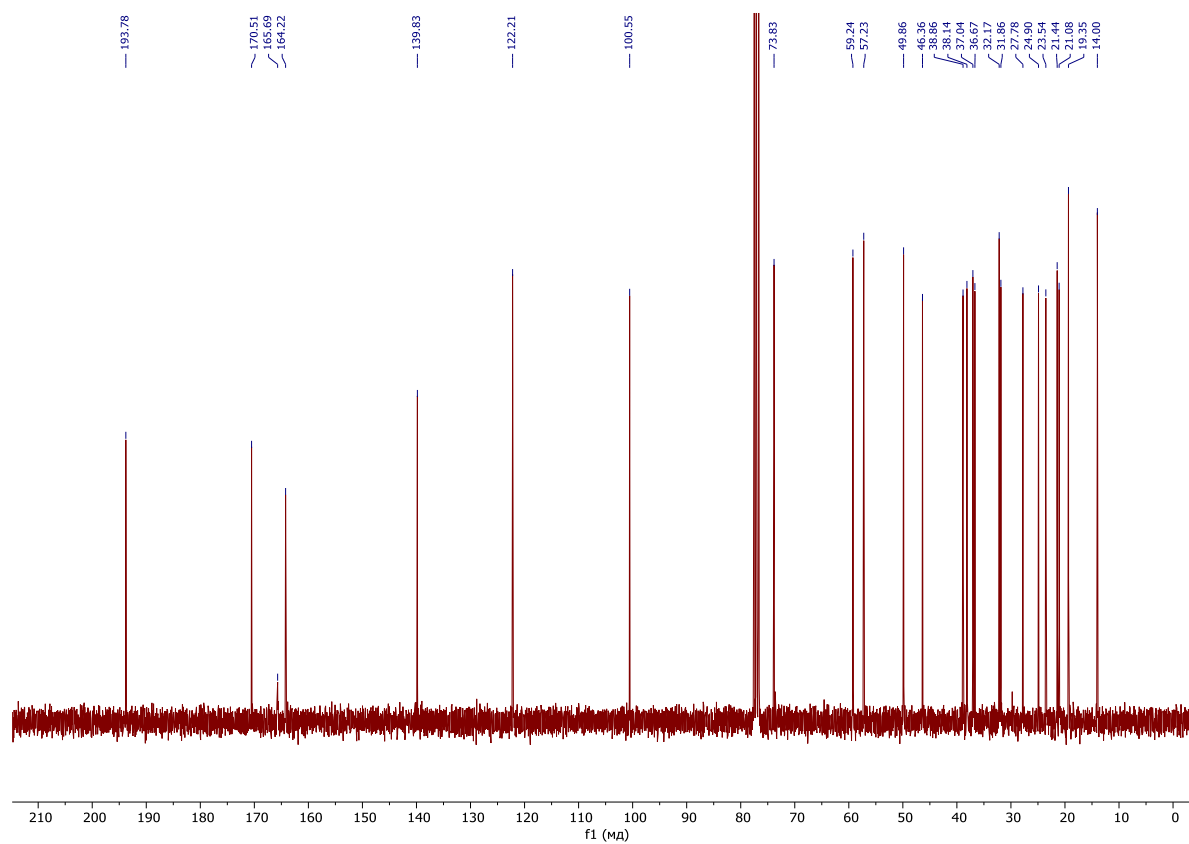

<sup>13</sup>C NMR (CDCl<sub>3</sub>, 75 MHz) spectrum of 3-acetate 21-(5-nitroisoxazole)-pregna-5-en-3β-ol-20-one (**2b**)

**Analysis Info**

Analysis Name D:\Data\Kolotyrkina\2021\Malahova\1202019.d  
Method tune\_50-1600.m  
Sample Name /YUVA MaVi-014f1  
Comment C25H32N2O6 mH 457.2333 clb added CH3CN

Acquisition Date 02.12.2021 17:17:46

Operator BDAL@DE  
Instrument / Ser# micrOTOF 10248

**Acquisition Parameter**

|             |            |                      |          |                  |           |
|-------------|------------|----------------------|----------|------------------|-----------|
| Source Type | ESI        | Ion Polarity         | Positive | Set Nebulizer    | 1.0 Bar   |
| Focus       | Not active |                      |          | Set Dry Heater   | 200 °C    |
| Scan Begin  | 50 m/z     | Set Capillary        | 4500 V   | Set Dry Gas      | 4.0 l/min |
| Scan End    | 1600 m/z   | Set End Plate Offset | -500 V   | Set Divert Valve | Waste     |

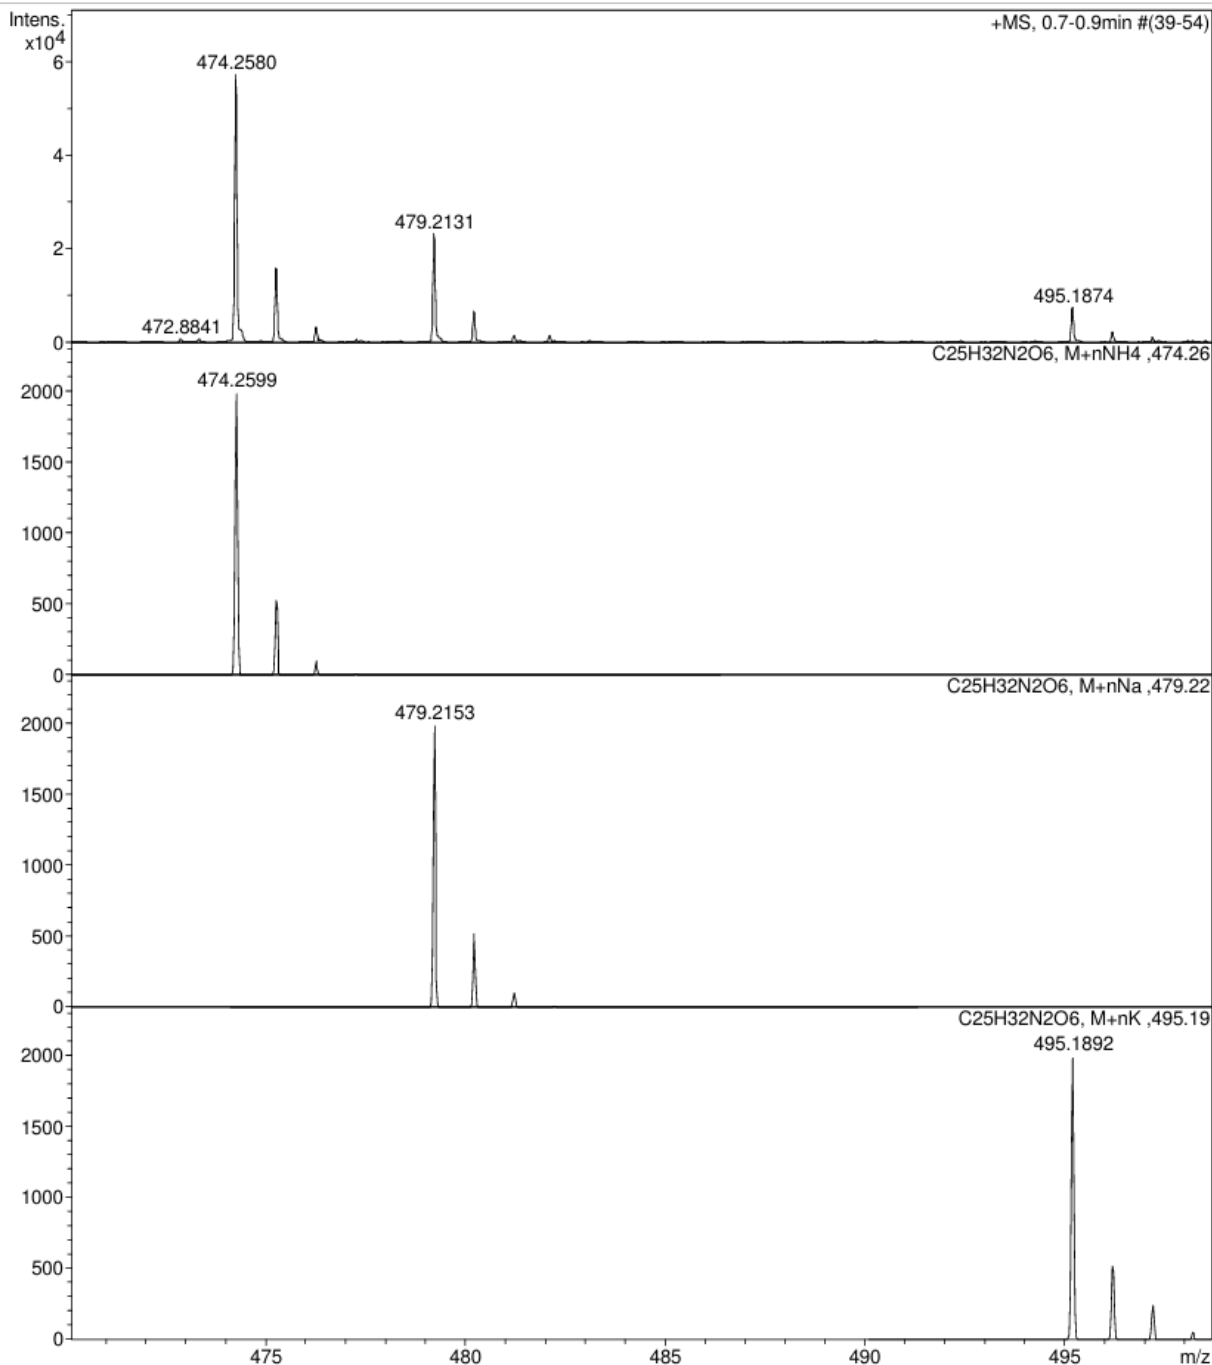

HRMS (ESI/Q-TOF) of 3-acetate 21-(5-nitroisoxazole)-pregna-5-en-3 $\beta$ -ol-20-one (**2b**)

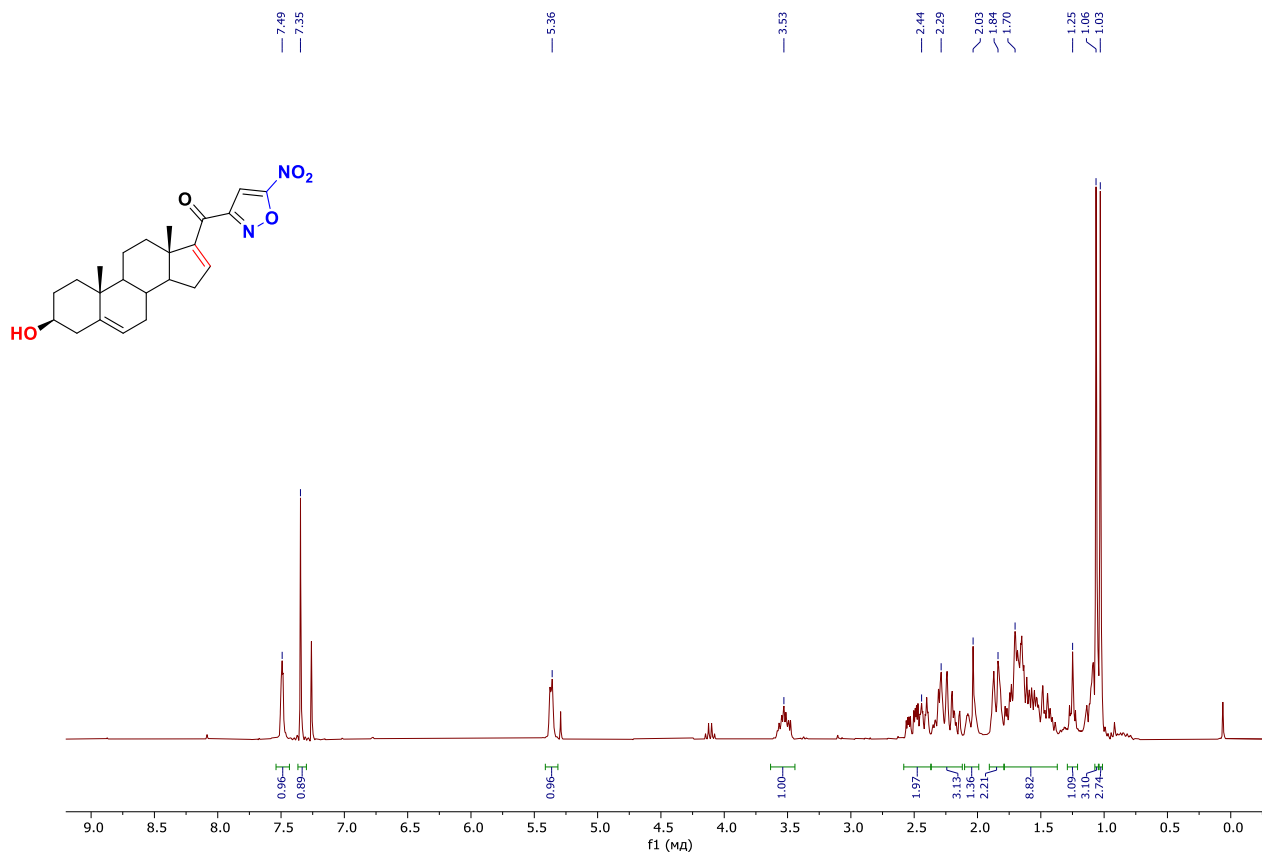

<sup>1</sup>H NMR (CDCl<sub>3</sub>, 300 MHz) spectrum of 21-(5-nitroisoxazole)-pregna-5,16-dien-3β-ol-20-one (2c)

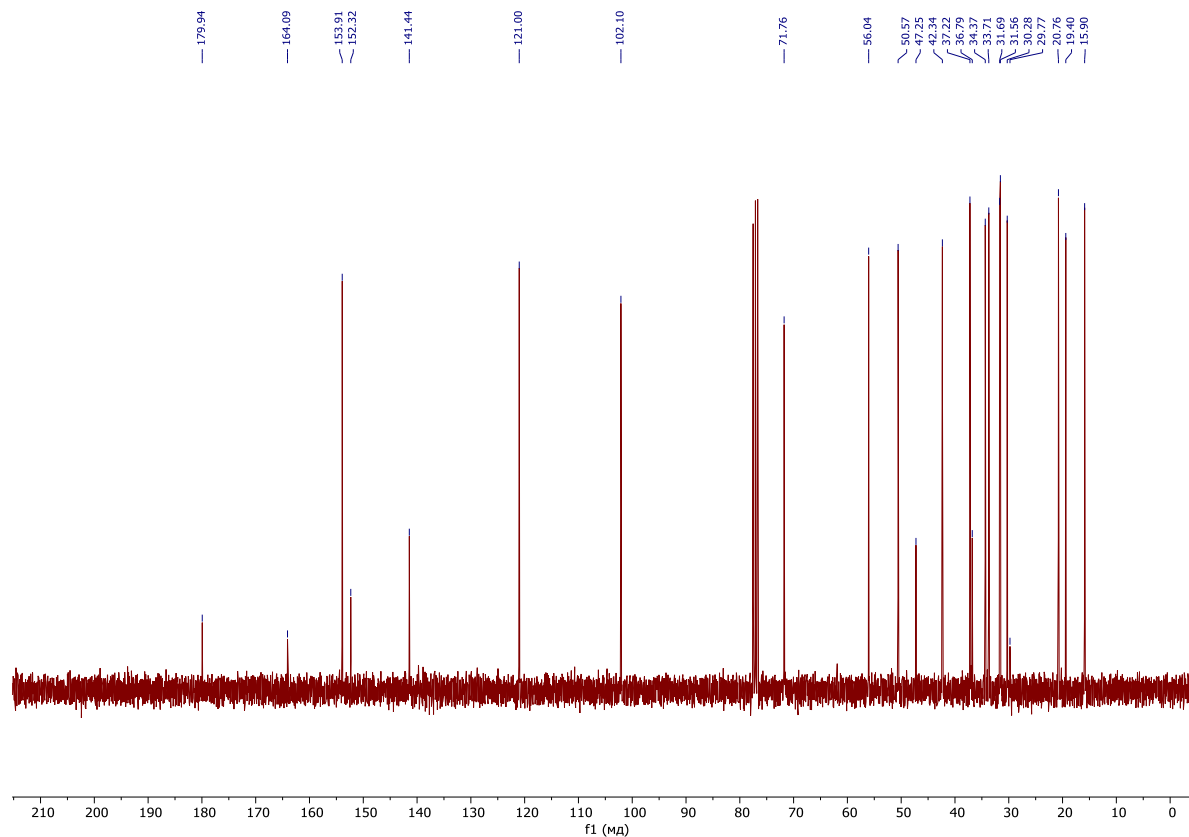

<sup>13</sup>C NMR (CDCl<sub>3</sub>, 75 MHz) spectrum of 21-(5-nitroisoxazole)-pregna-5,16-dien-3β-ol-20-one (2c)

**Analysis Info**

Analysis Name D:\Data\Kolotyrkina\2023\Malahova\0112014.d  
Method tune\_low.m  
Sample Name /YUVA MaVi101f2  
Comment C23H28N2O5 mH 413.2070 calibrant added CH3OH

Acquisition Date 12.01.2023 12:06:47

Operator BDAL@DE  
Instrument / Ser# micrOTOF 10248

**Acquisition Parameter**

|             |            |                      |          |                  |           |
|-------------|------------|----------------------|----------|------------------|-----------|
| Source Type | ESI        | Ion Polarity         | Positive | Set Nebulizer    | 0.4 Bar   |
| Focus       | Not active |                      |          | Set Dry Heater   | 180 °C    |
| Scan Begin  | 50 m/z     | Set Capillary        | 4500 V   | Set Dry Gas      | 4.0 l/min |
| Scan End    | 2500 m/z   | Set End Plate Offset | -500 V   | Set Divert Valve | Waste     |

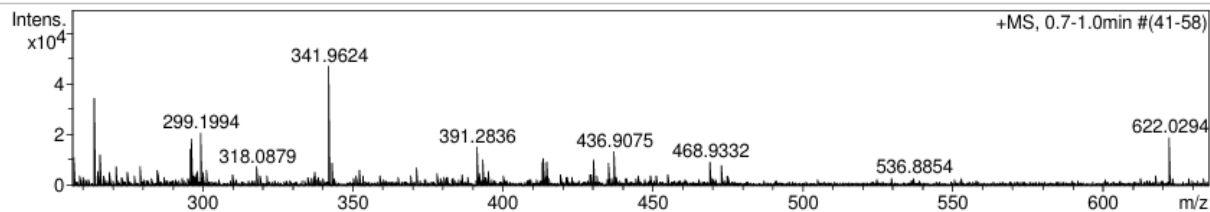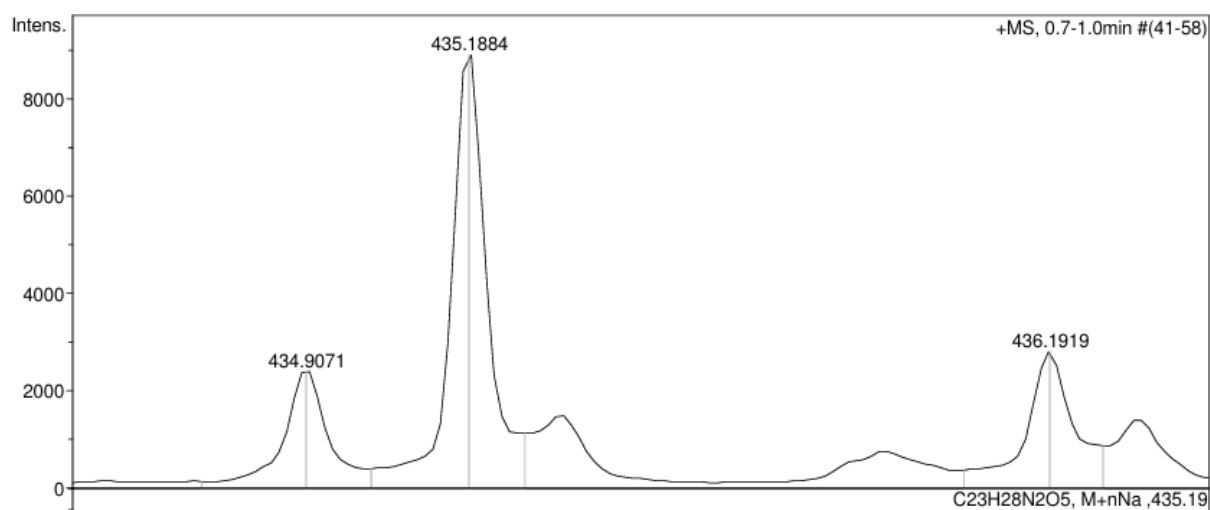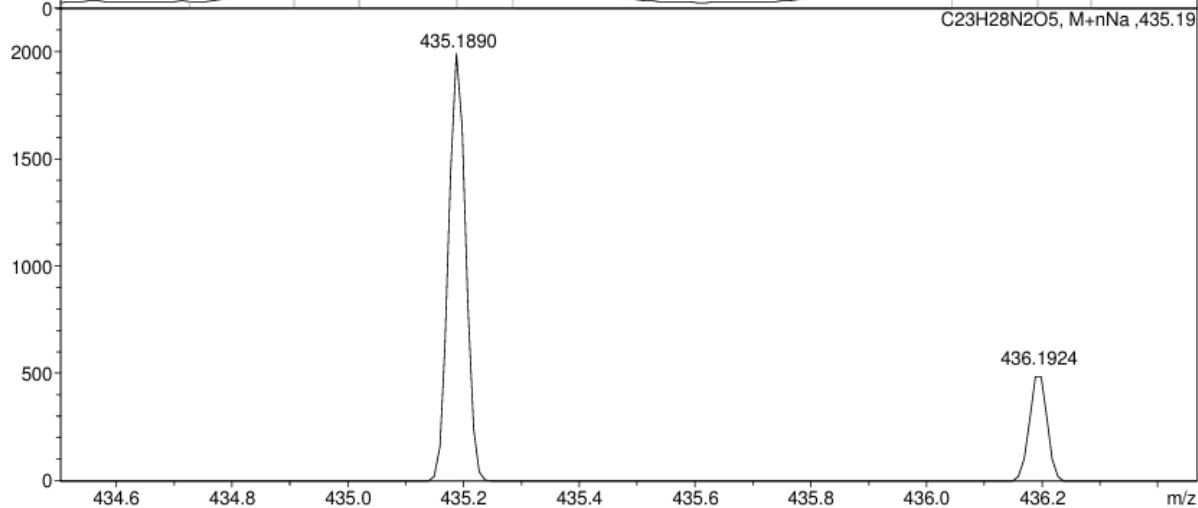

HRMS (ESI/Q-TOF) of 21-(5-nitroisoxazole)-pregna-5,16-dien-3 $\beta$ -ol-20-one (**2c**)

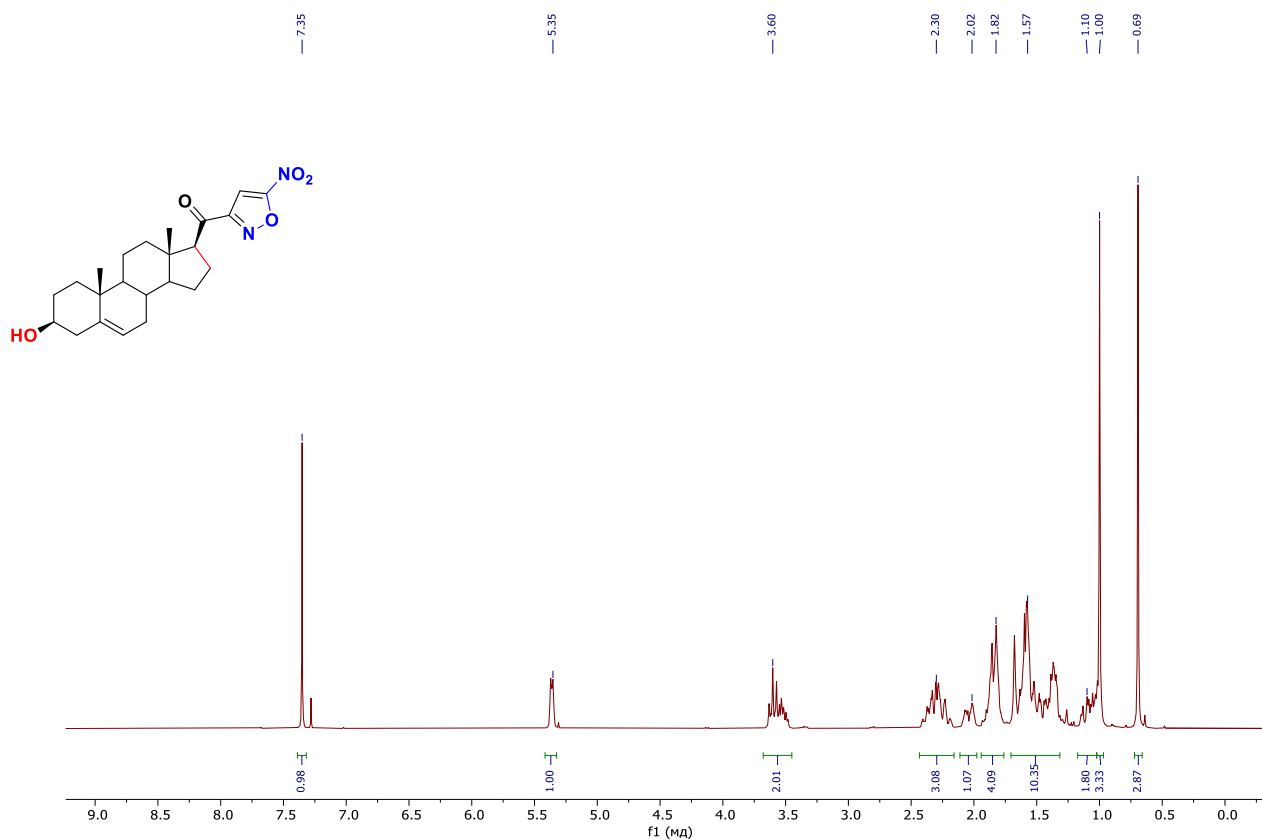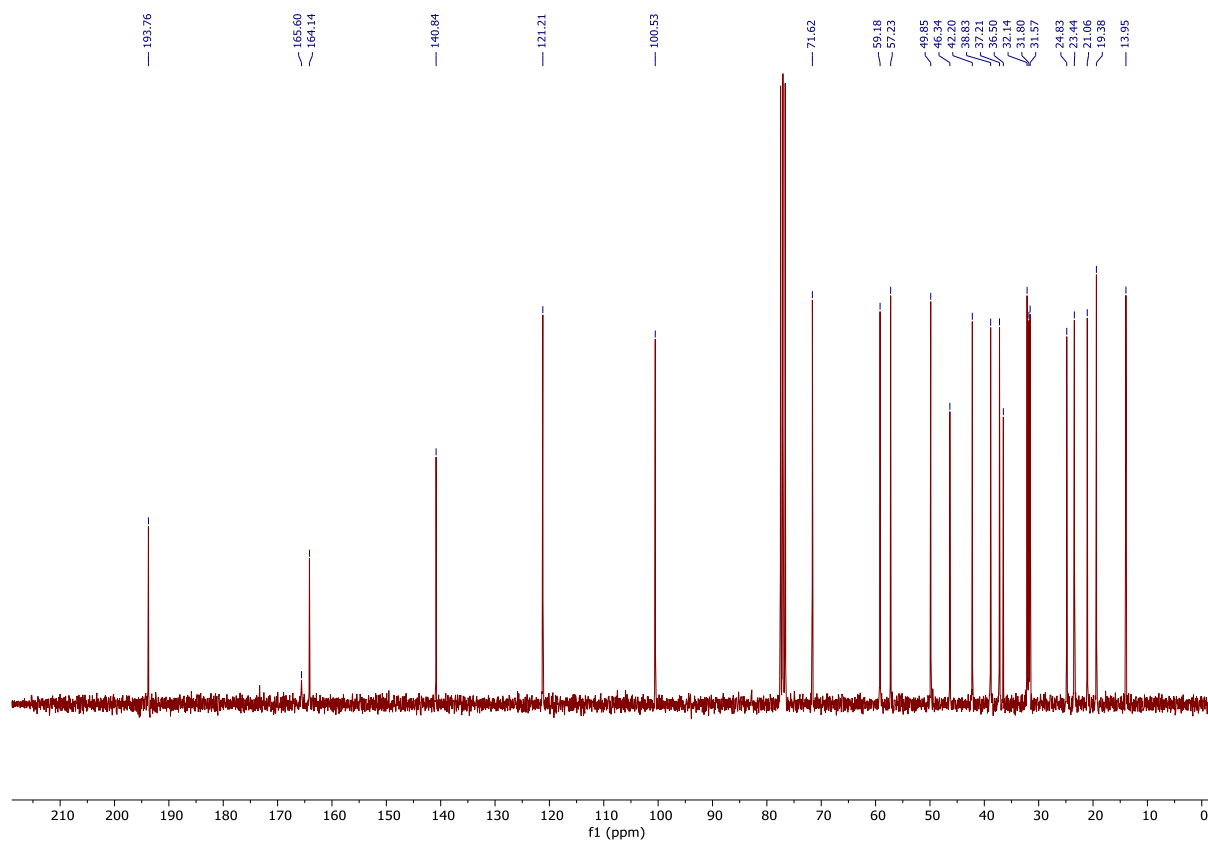

**Analysis Info**

Analysis Name D:\Data\Kolotyrkina\2024\Volkova\0131024.d  
Method tune\_low.m  
Sample Name /YUVA MaVi-184f2  
Comment C23H30N2O5 mH415.2227 calibrant added CH3OH

Acquisition Date 31.01.2024 14:52:53

Operator BDAL@DE  
Instrument / Ser# micrOTOF 10248

**Acquisition Parameter**

|             |            |                      |          |                  |           |
|-------------|------------|----------------------|----------|------------------|-----------|
| Source Type | ESI        | Ion Polarity         | Positive | Set Nebulizer    | 0.4 Bar   |
| Focus       | Not active |                      |          | Set Dry Heater   | 180 °C    |
| Scan Begin  | 50 m/z     | Set Capillary        | 4500 V   | Set Dry Gas      | 4.0 l/min |
| Scan End    | 3000 m/z   | Set End Plate Offset | -500 V   | Set Divert Valve | Waste     |

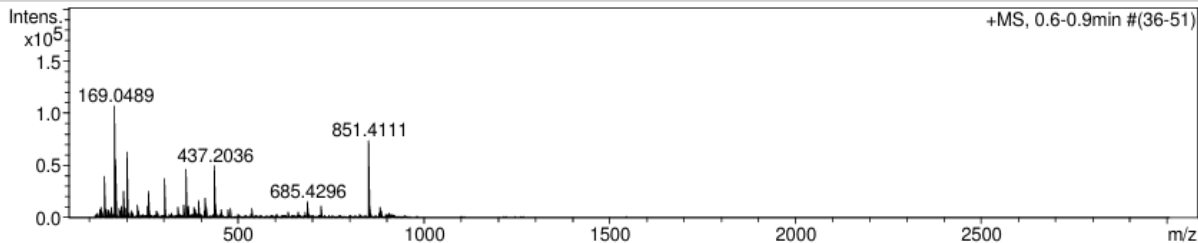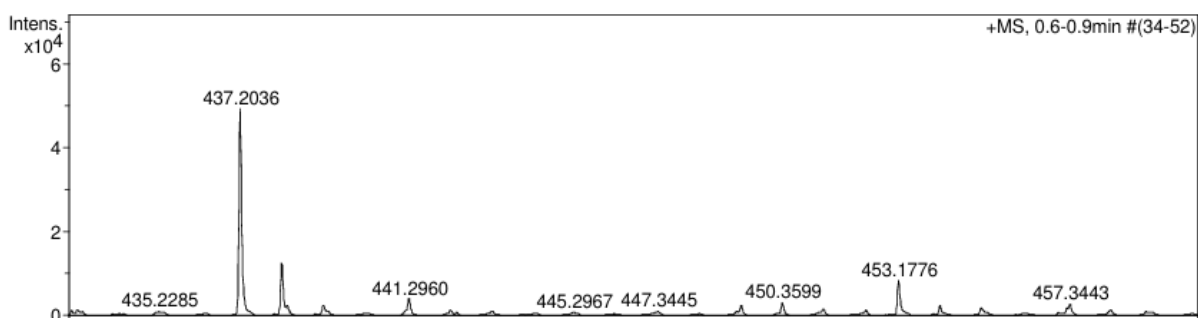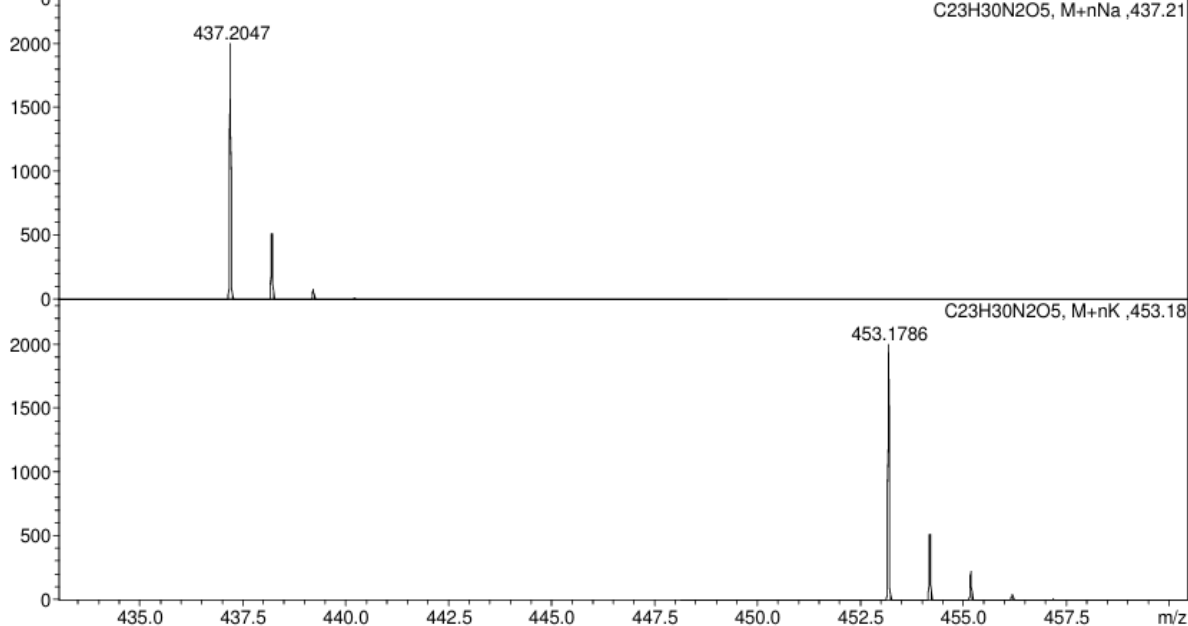

HRMS (ESI/Q-TOF) of 21-(5-nitroisoxazole)-pregna-5-en-3 $\beta$ -ol-20-one (**2d**)

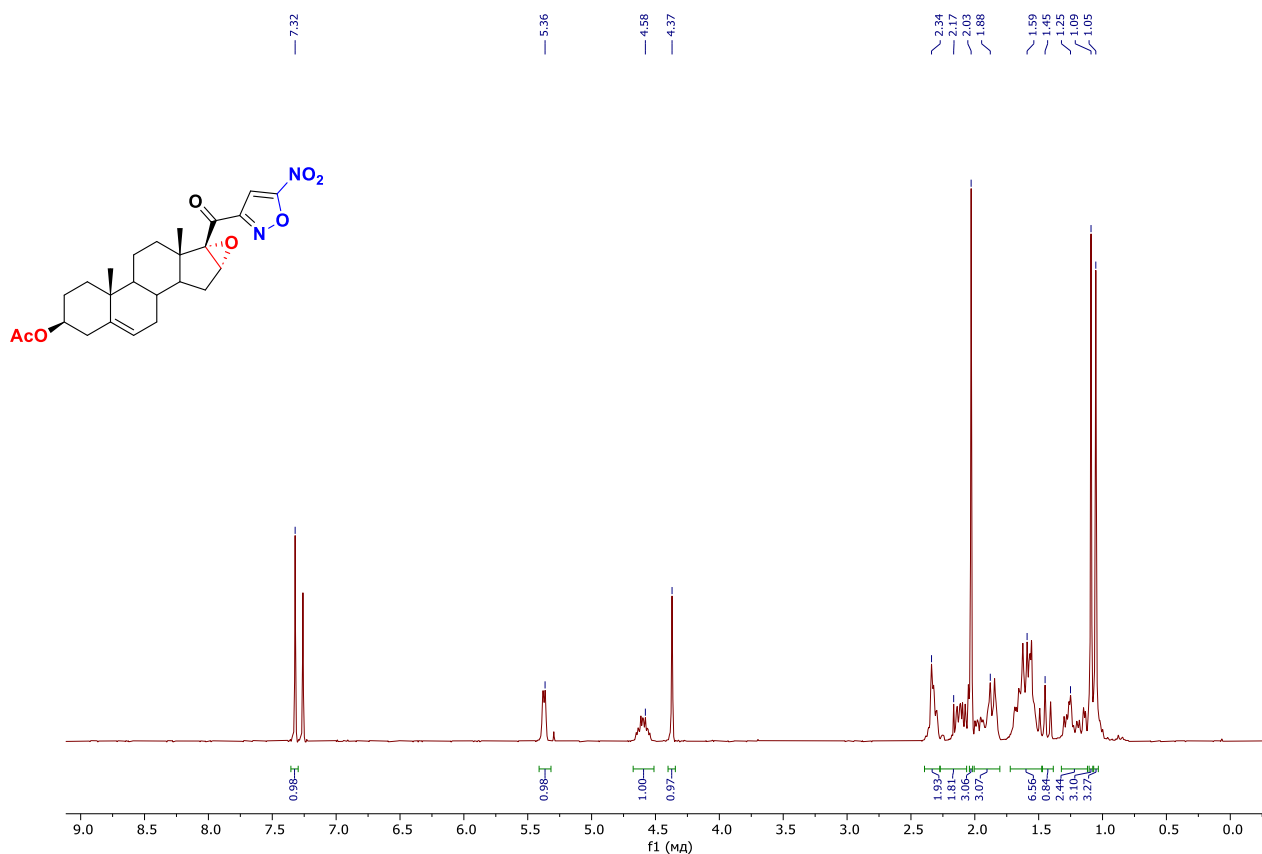

<sup>1</sup>H NMR (CDCl<sub>3</sub>, 300 MHz) spectrum of 3-acetate 16 $\alpha$ ,17 $\alpha$ -epoxy-21-(5-nitroisoxazole)-pregna-5-en-3 $\beta$ -ol-20-one (2e)

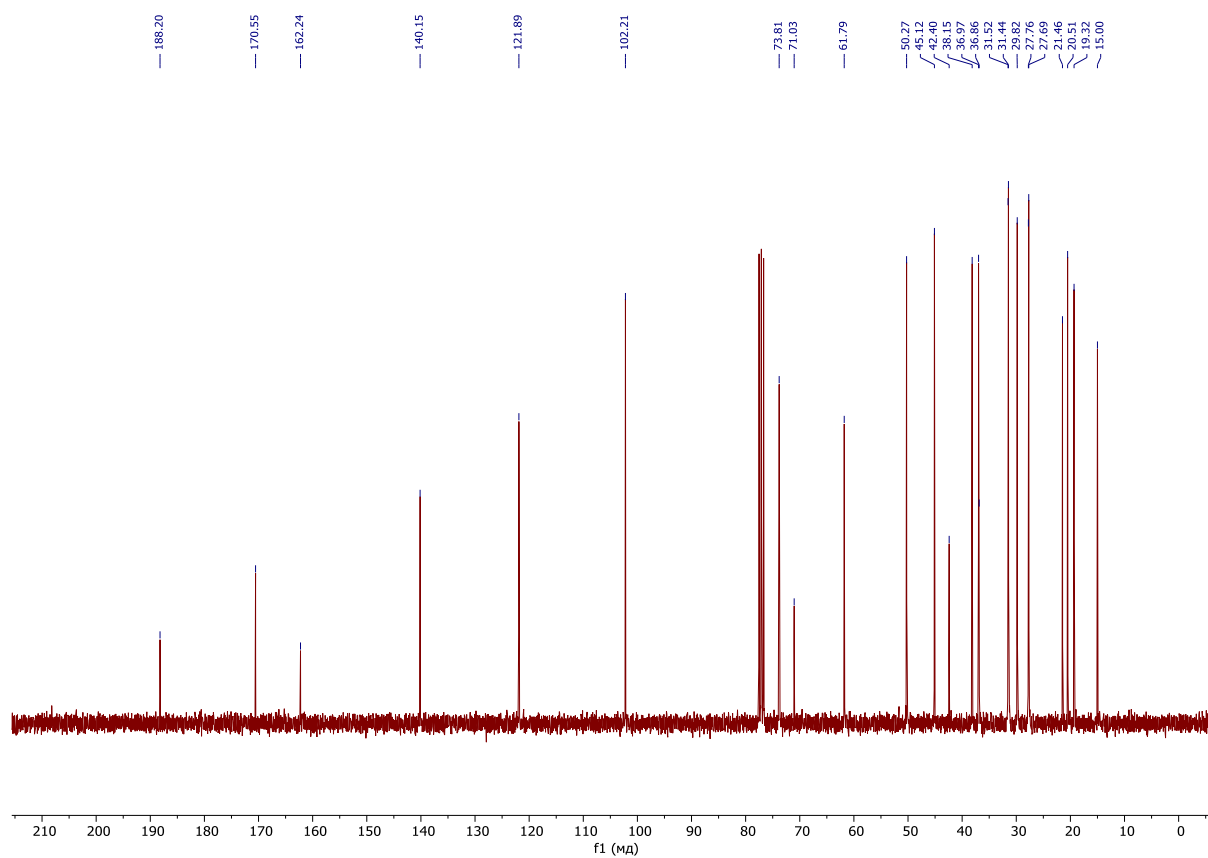

<sup>13</sup>C NMR (CDCl<sub>3</sub>, 75 MHz) spectrum of 3-acetate 16 $\alpha$ ,17 $\alpha$ -epoxy-21-(5-nitroisoxazole)-pregna-5-en-3 $\beta$ -ol-20-one (2e)



**Analysis Info**

Analysis Name D:\Data\Kolotyrkina\2022\Malahova\1101002.d  
Method tune\_wide.m  
Sample Name /YUVA MaVi-087f1  
Comment C25H30N2O7 mH471.2125 calibrant added CH3OH

Acquisition Date 01.12.2022 10:32:32

Operator BDAL@DE  
Instrument / Ser# micrOTOF 10248

**Acquisition Parameter**

|             |            |                      |          |                  |           |
|-------------|------------|----------------------|----------|------------------|-----------|
| Source Type | ESI        | Ion Polarity         | Positive | Set Nebulizer    | 0.4 Bar   |
| Focus       | Not active |                      |          | Set Dry Heater   | 180 °C    |
| Scan Begin  | 50 m/z     | Set Capillary        | 4500 V   | Set Dry Gas      | 4.0 l/min |
| Scan End    | 3000 m/z   | Set End Plate Offset | -500 V   | Set Divert Valve | Waste     |

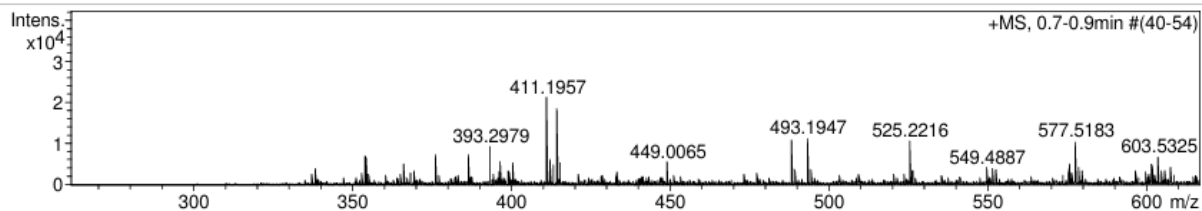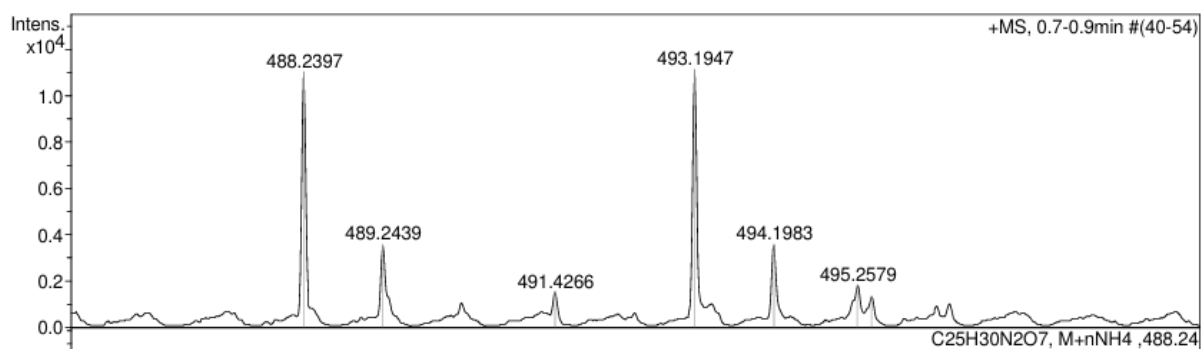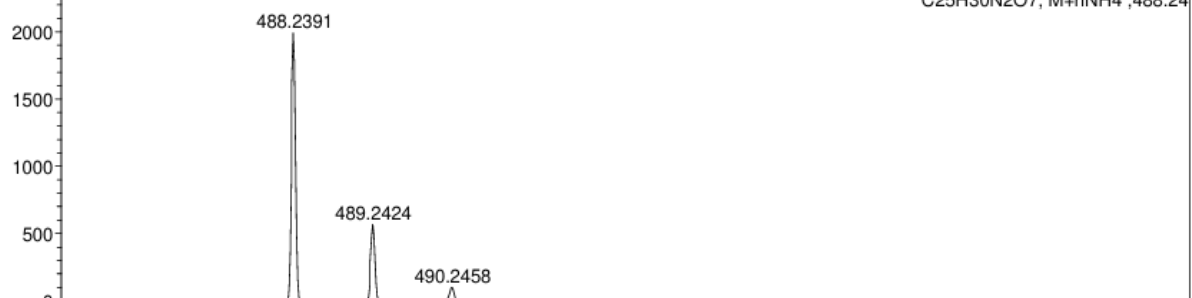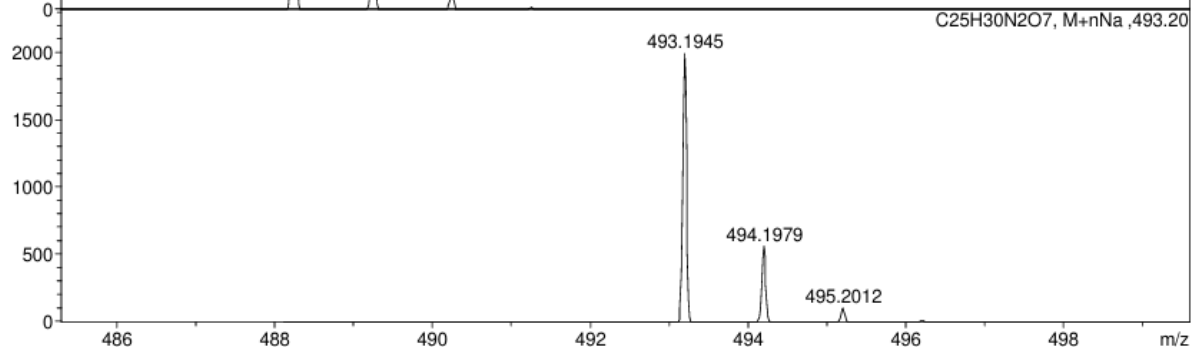

HRMS (ESI/Q-TOF) of 3-acetate 16 $\alpha$ ,17 $\alpha$ -epoxy-21-(5-nitroisoxazole)-pregna-5-en-3 $\beta$ -ol-20-one (**2e**)

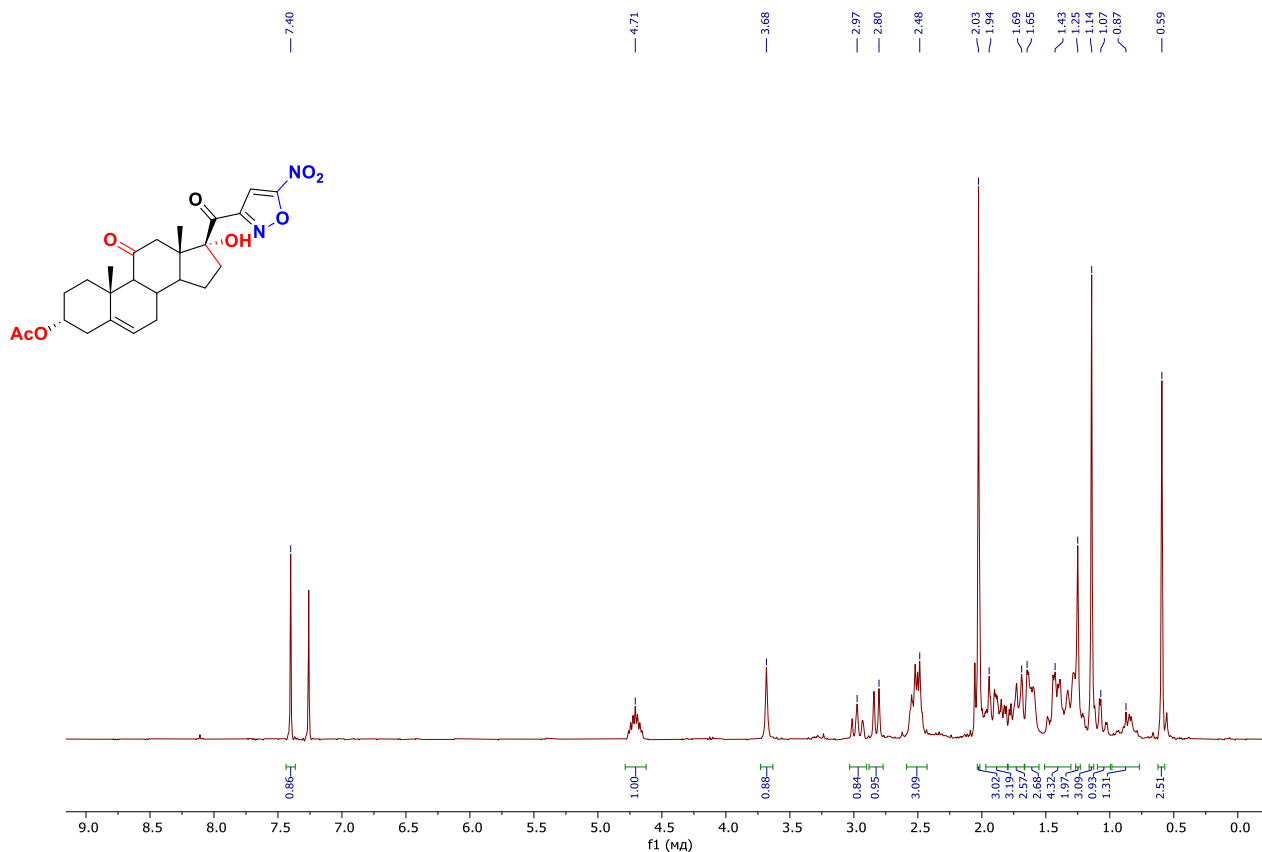

<sup>1</sup>H NMR (CDCl<sub>3</sub>, 300 MHz) spectrum of 3-acetate of 21-(5-nitroisoxazole)-pregna-3β-ol, 17α-hydroxy-11,20-dione, 5β (2f)

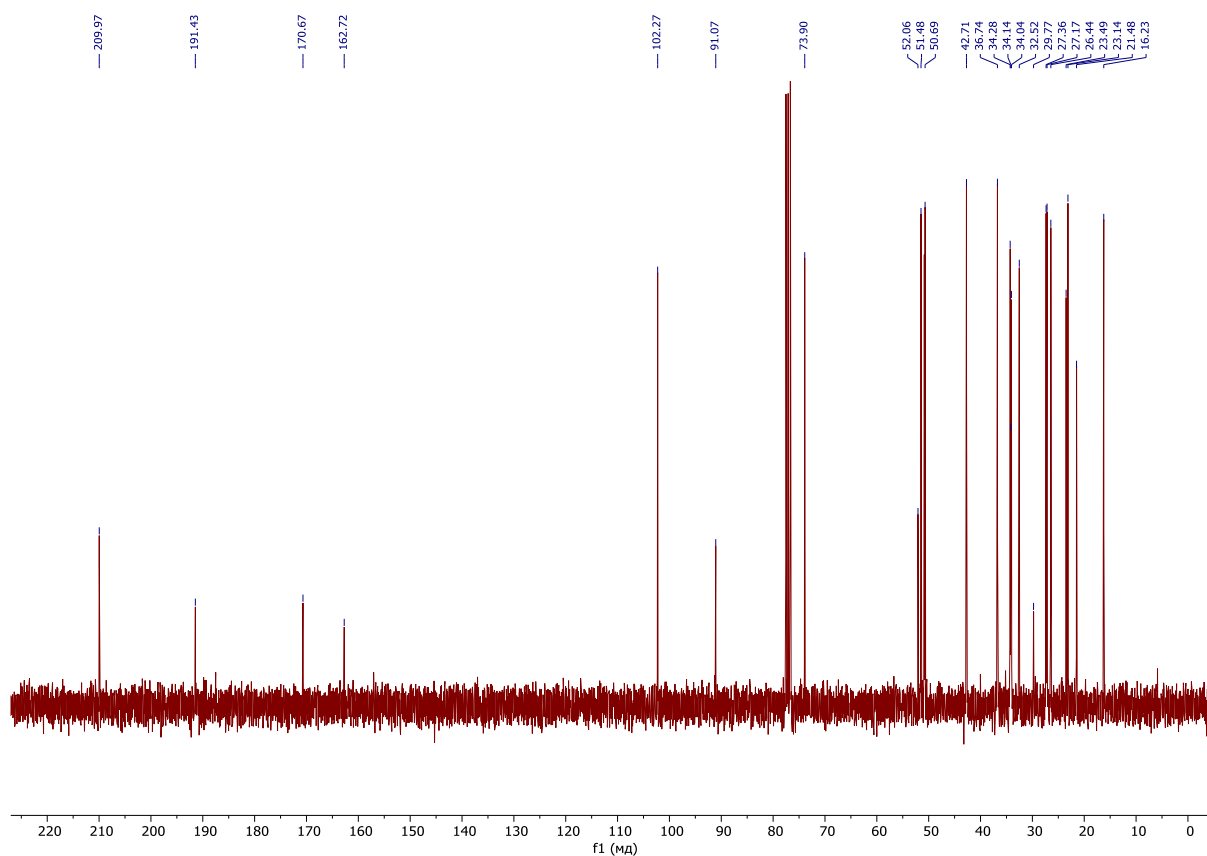

<sup>13</sup>C NMR (CDCl<sub>3</sub>, 75 MHz) spectrum of 3-acetate of 21-(5-nitroisoxazole)-pregna-3β-ol, 17α-hydroxy-11,20-dione, 5β (2f)



**Analysis Info**

Analysis Name D:\Data\Kolotyrykina\2023\Malahova\0124013.d  
Method tune\_low.m  
Sample Name /YUVA MaVi-103f3.3  
Comment C25H32N2O8 mH 489.2231 calibrant added CH3OH

Acquisition Date 24.01.2023 12:05:42

Operator BDAL@DE  
Instrument / Ser# micrOTOF 10248

**Acquisition Parameter**

|             |            |                      |          |                  |           |
|-------------|------------|----------------------|----------|------------------|-----------|
| Source Type | ESI        | Ion Polarity         | Positive | Set Nebulizer    | 0.4 Bar   |
| Focus       | Not active |                      |          | Set Dry Heater   | 180 °C    |
| Scan Begin  | 50 m/z     | Set Capillary        | 4500 V   | Set Dry Gas      | 4.0 l/min |
| Scan End    | 2500 m/z   | Set End Plate Offset | -500 V   | Set Divert Valve | Waste     |

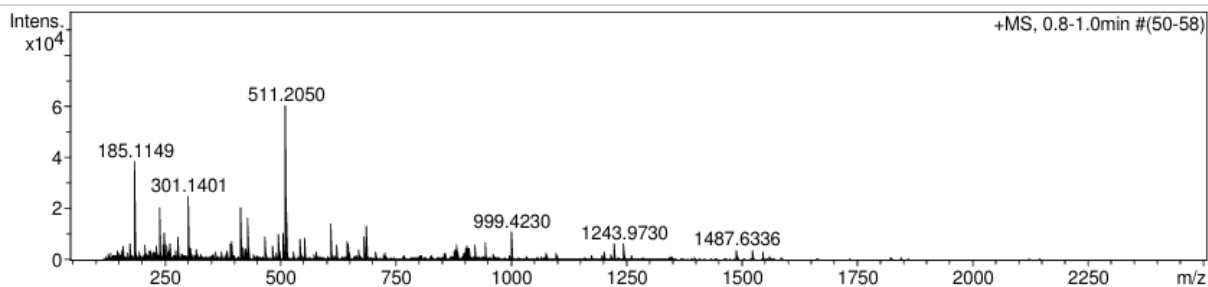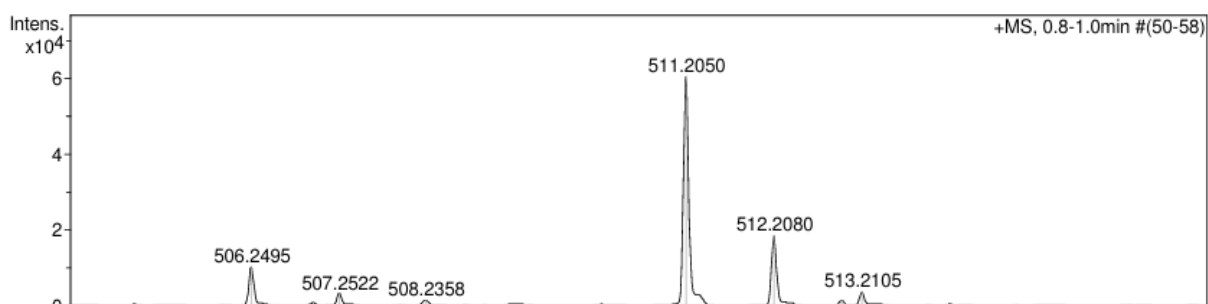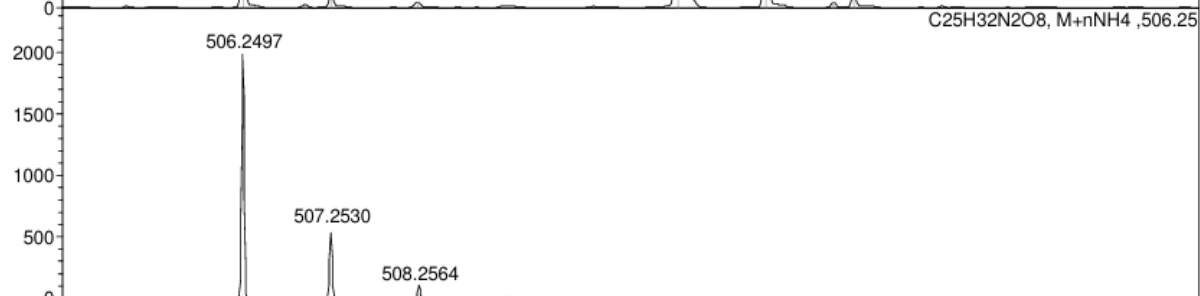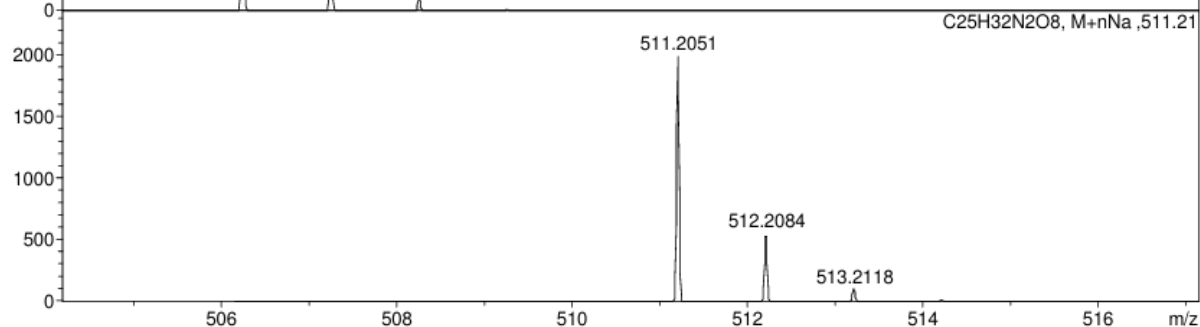

HRMS (ESI/Q-TOF) of 3-acetate of 21-(5-nitroisoxazole)-pregna-3 $\beta$ -ol, 17 $\alpha$ -hydroxy-11,20-dione, 5 $\beta$  (**2f**)

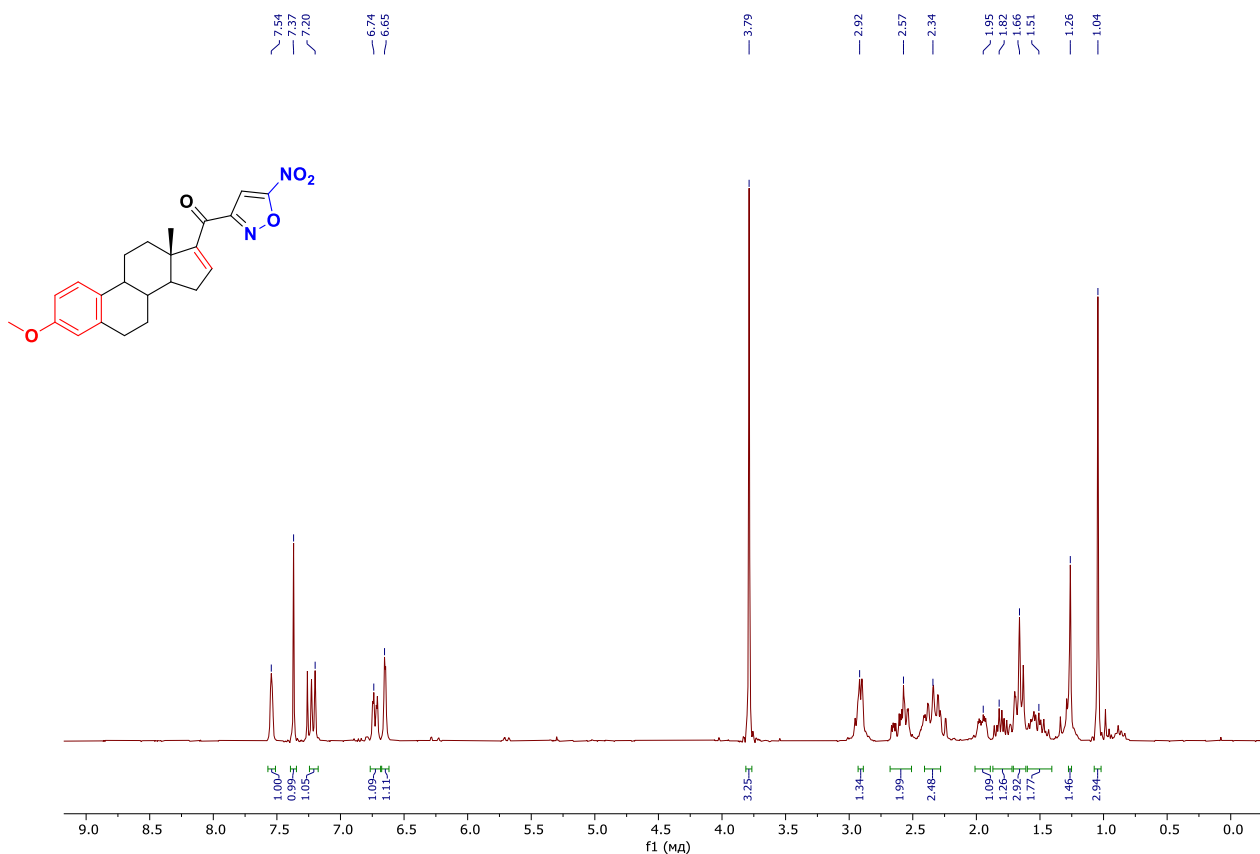

<sup>1</sup>H NMR (CDCl<sub>3</sub>, 300 MHz) spectrum of 21-(5-nitroisoxazole)-3-methoxy-19-nor-pregna-1,3,5(10),16,21-pentaen-20-one (2g)

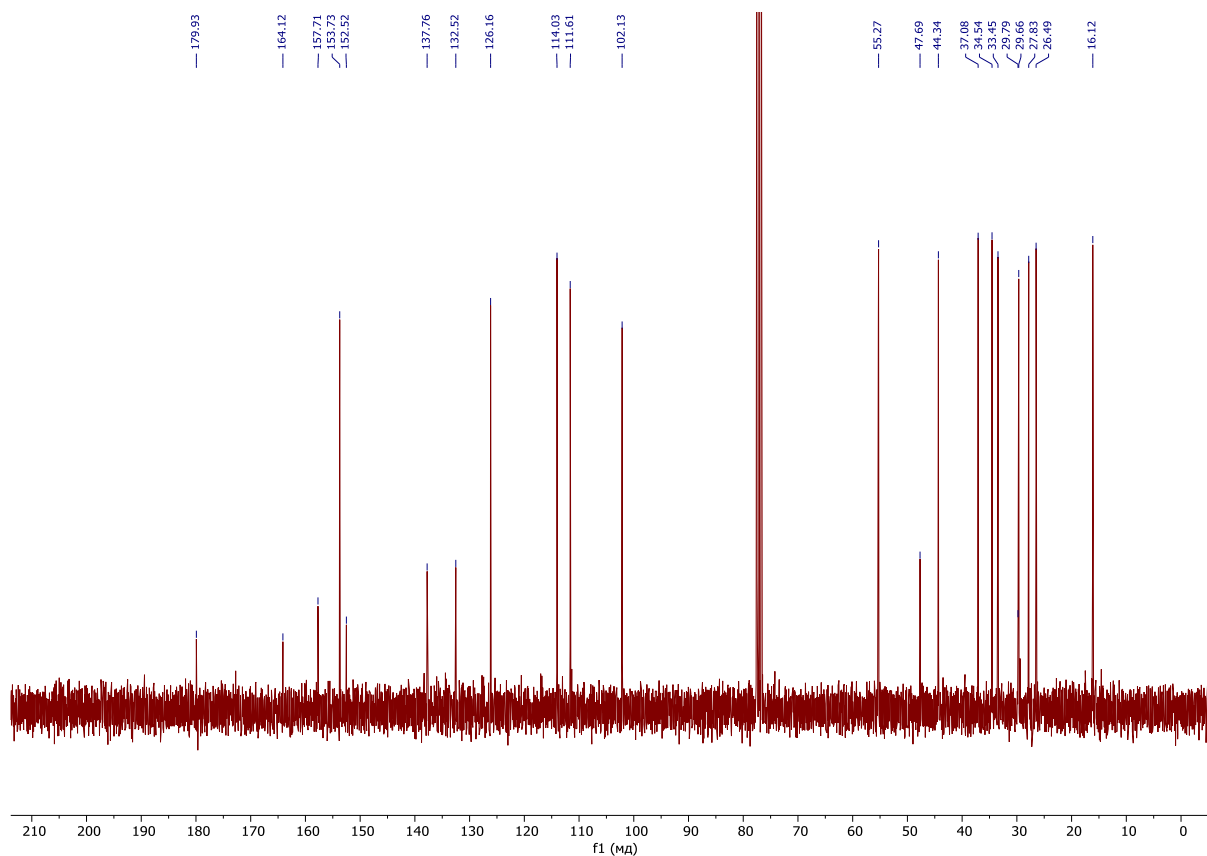

<sup>13</sup>C NMR (CDCl<sub>3</sub>, 75 MHz) spectrum of 21-(5-nitroisoxazole)-3-methoxy-19-nor-pregna-1,3,5(10),16,21-pentaen-20-one (2g)



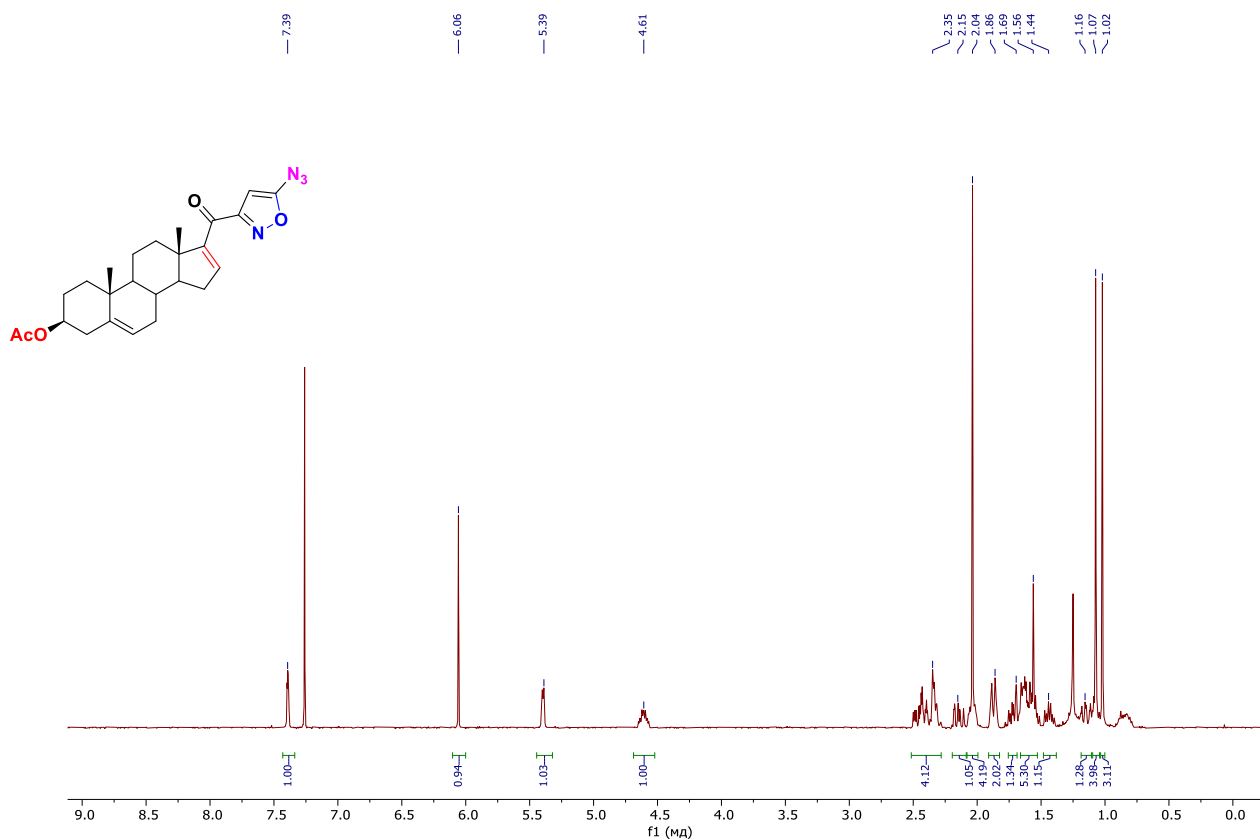

$^1\text{H}$  NMR (400 MHz,  $\text{CDCl}_3$ ) spectrum of 3-acetate 20-[3'-(5''-azide)isoxazole]-pregn-5,16-dien-3 $\beta$ -ol-20-one (3a)

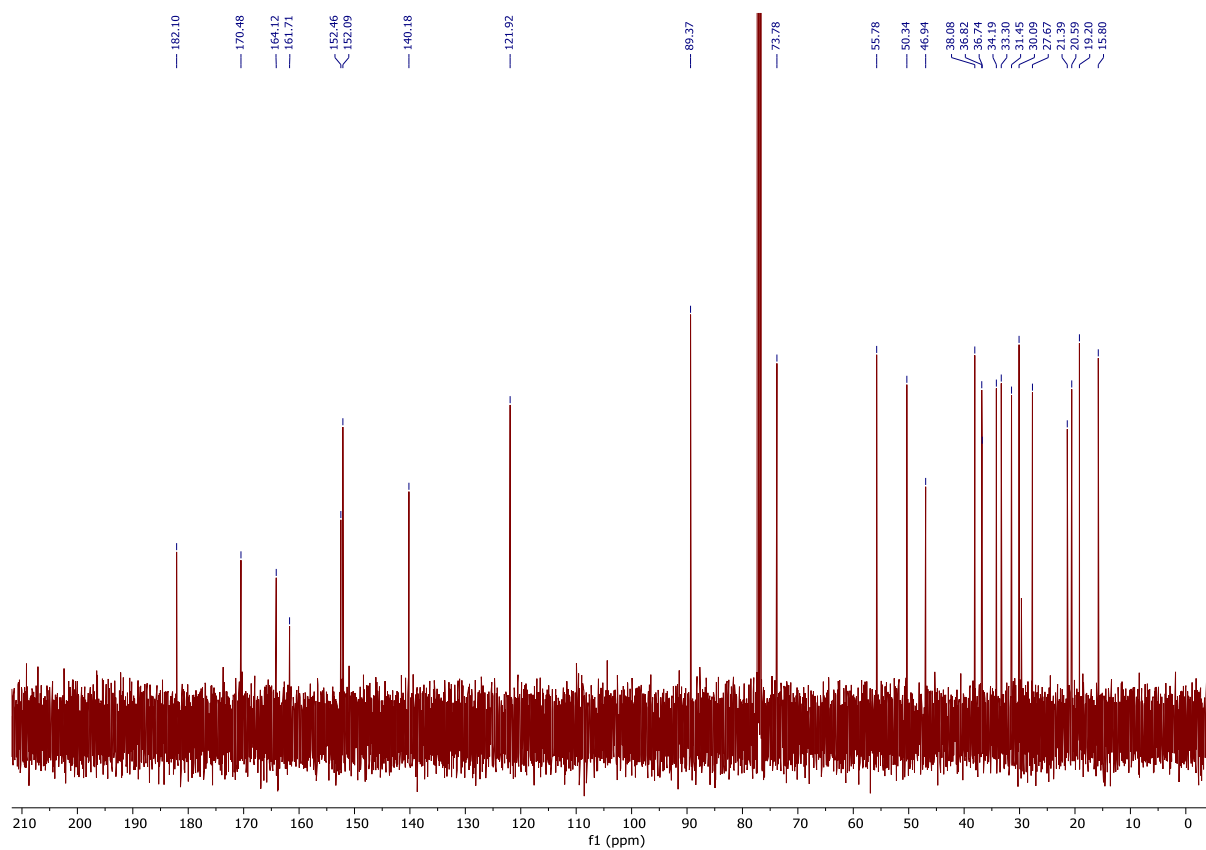

$^{13}\text{C}$  NMR (126 MHz,  $\text{CDCl}_3$ ) spectrum of 3-acetate 20-[3'-(5''-azide)isoxazole]-pregn-5,16-dien-3 $\beta$ -ol-20-one (3a)

**Analysis Info**

Analysis Name D:\Data\Kolotyrkina\2023\Volkova\1123003.d  
Method tune\_low.m  
Sample Name /YUVA VIKA-011f2  
Comment C25H30N4O4 mH451.2339 clb added CH3OH

Acquisition Date 23.11.2023 10:56:45

Operator BDAL@DE  
Instrument / Ser# micrOTOF 10248

**Acquisition Parameter**

|             |            |                      |          |                  |           |
|-------------|------------|----------------------|----------|------------------|-----------|
| Source Type | ESI        | Ion Polarity         | Positive | Set Nebulizer    | 0.4 Bar   |
| Focus       | Not active |                      |          | Set Dry Heater   | 180 °C    |
| Scan Begin  | 50 m/z     | Set Capillary        | 4500 V   | Set Dry Gas      | 4.0 l/min |
| Scan End    | 3000 m/z   | Set End Plate Offset | -500 V   | Set Divert Valve | Waste     |

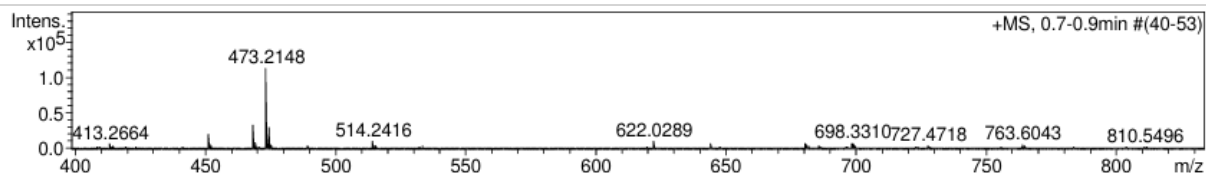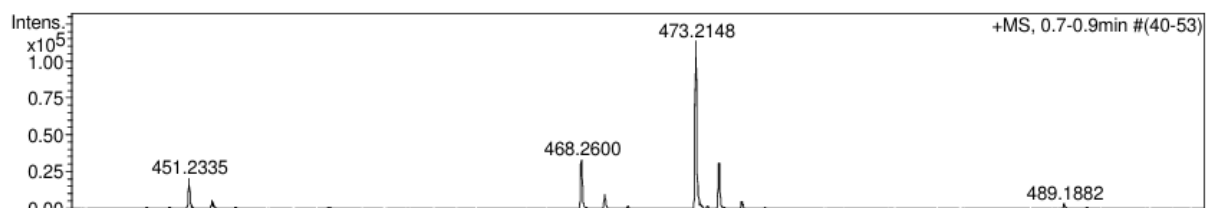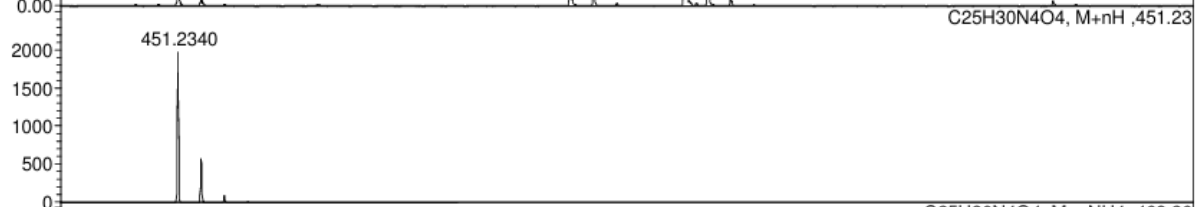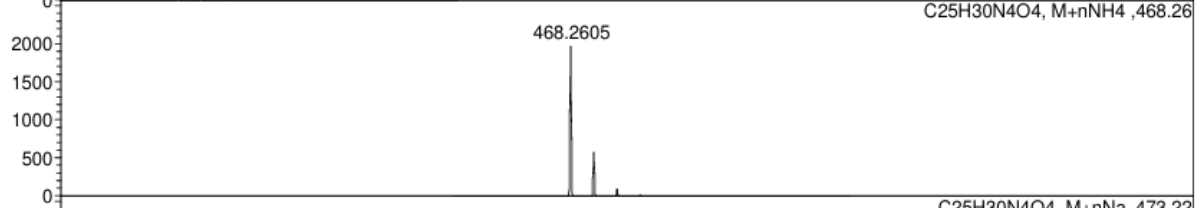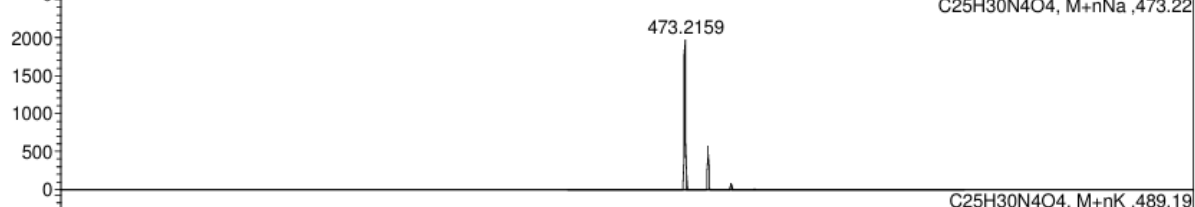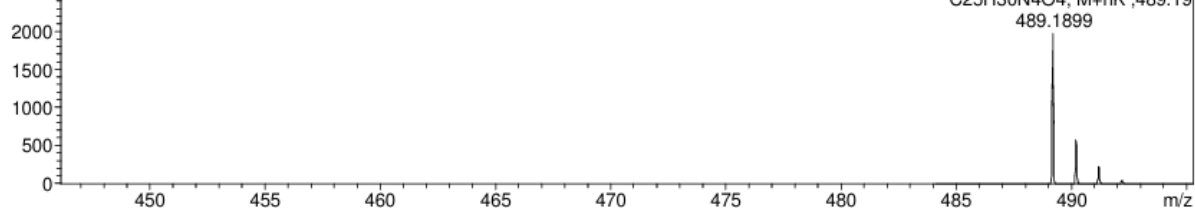

HRMS (ESI/Q-TOF) of 3-acetate 20-[3`-(5``-azide)isoxazole]-pregn-5,16-dien-3β-ol-20-one (**3a**)

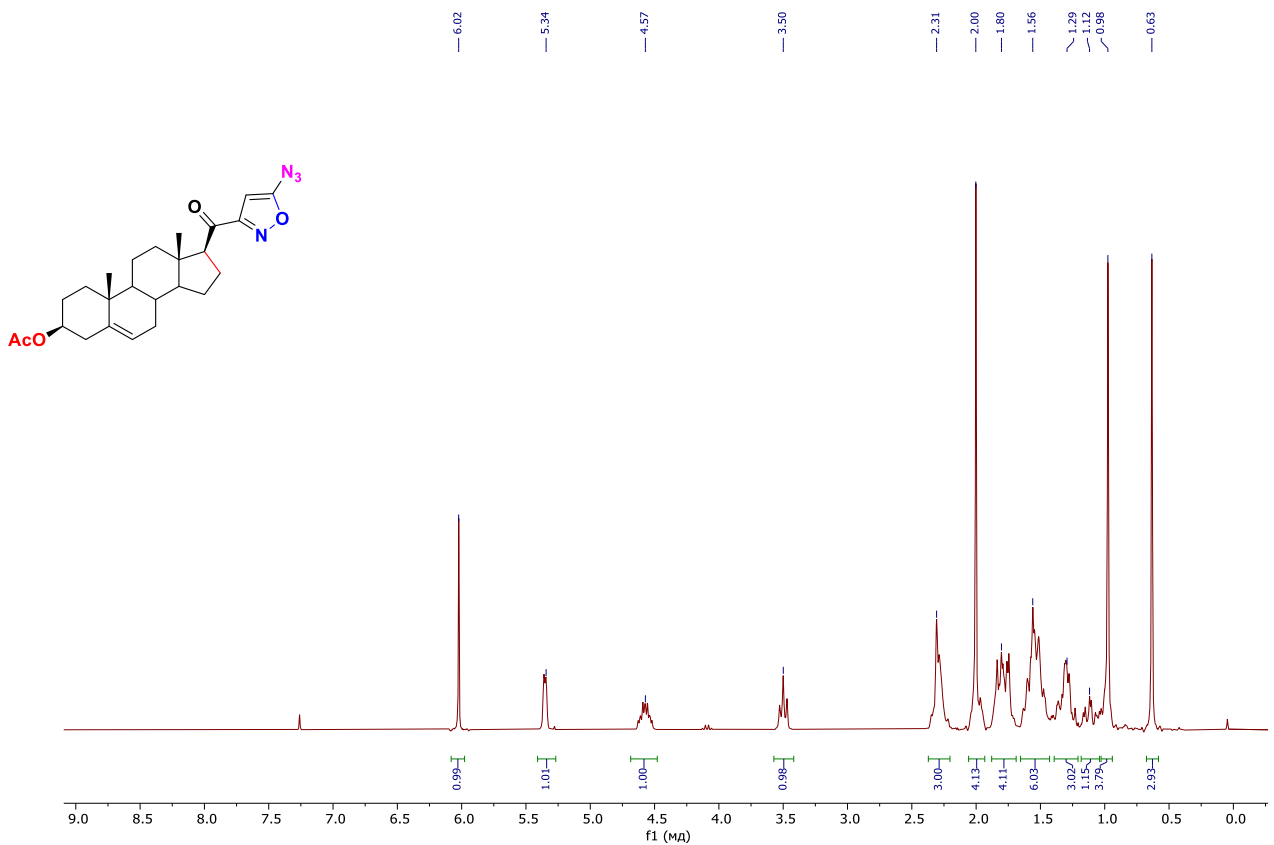

<sup>1</sup>H NMR (CDCl<sub>3</sub>, 300 MHz) spectrum of 3-acetate 20-[3'-(5''-azide)isoxazole]-pregn-5-en-3 $\beta$ -ol-20-one (**3b**)

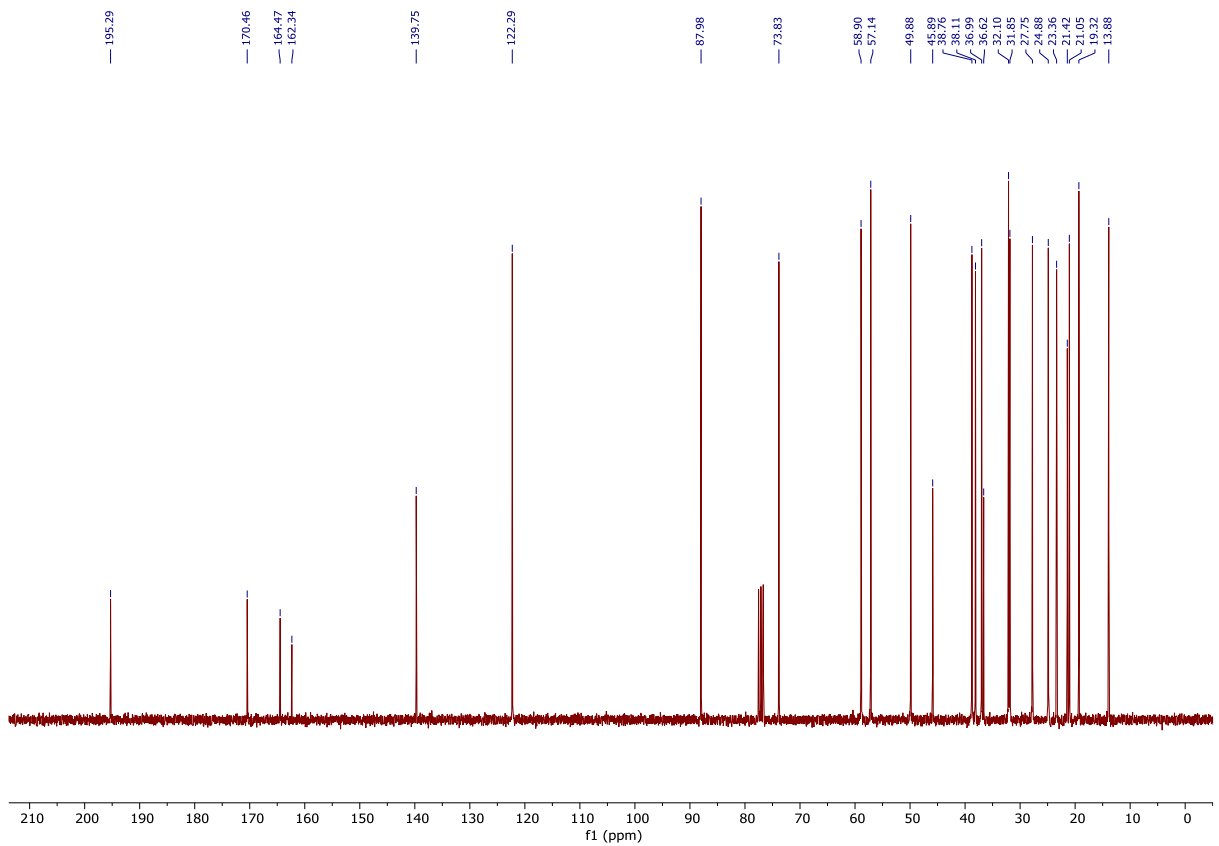

<sup>13</sup>C NMR (CDCl<sub>3</sub>, 75 MHz) spectrum of 3-acetate 20-[3'-(5''-azide)isoxazole]-pregn-5-en-3 $\beta$ -ol-20-one (**3b**)

**Analysis Info**

Analysis Name D:\Data\Kolotyrykina\2024\Volkova\0208042.d  
Method tune\_low.m  
Sample Name /YUVA vika-185f1  
Comment C25H32N4O4 mH453.2496 calibrant added CH3OH

Acquisition Date 08.02.2024 18:02:25

Operator BDAL@DE  
Instrument / Ser# micrOTOF 10248

**Acquisition Parameter**

|             |            |                      |          |                  |           |
|-------------|------------|----------------------|----------|------------------|-----------|
| Source Type | ESI        | Ion Polarity         | Positive | Set Nebulizer    | 0.4 Bar   |
| Focus       | Not active |                      |          | Set Dry Heater   | 180 °C    |
| Scan Begin  | 50 m/z     | Set Capillary        | 4500 V   | Set Dry Gas      | 4.0 l/min |
| Scan End    | 3000 m/z   | Set End Plate Offset | -500 V   | Set Divert Valve | Waste     |

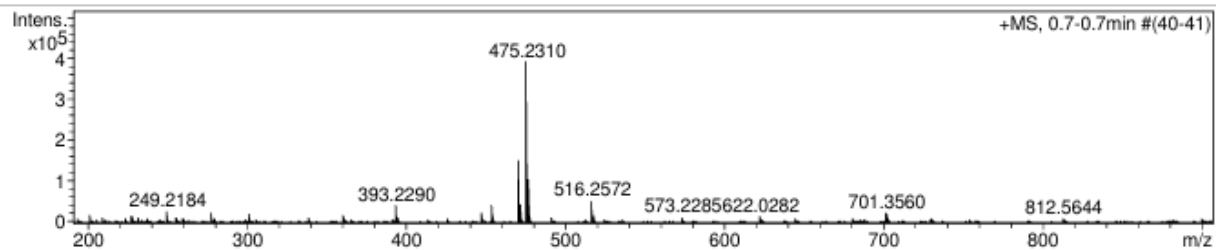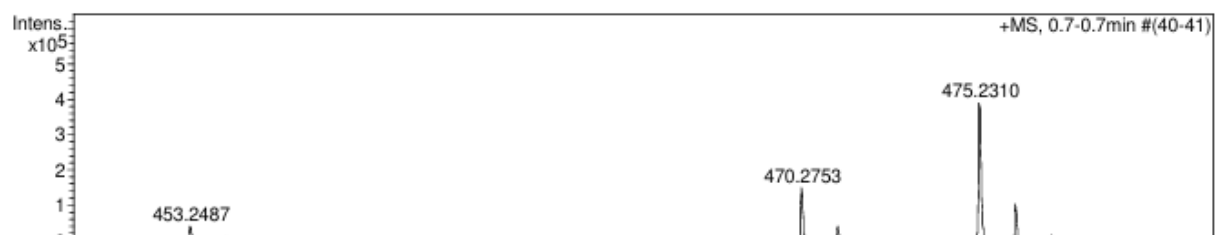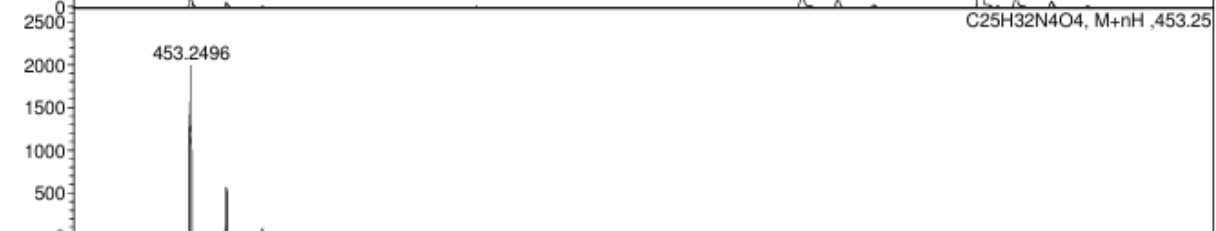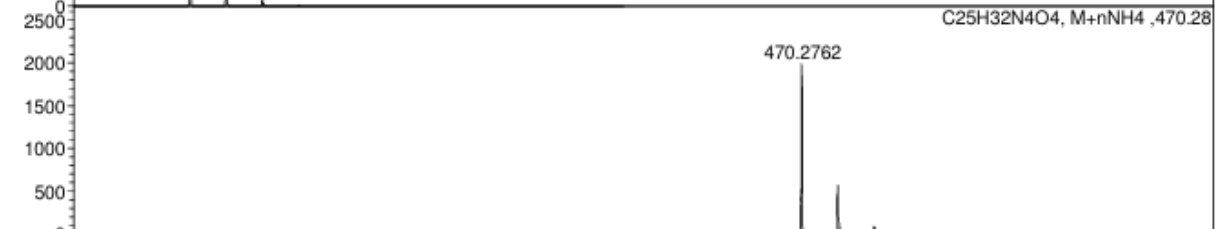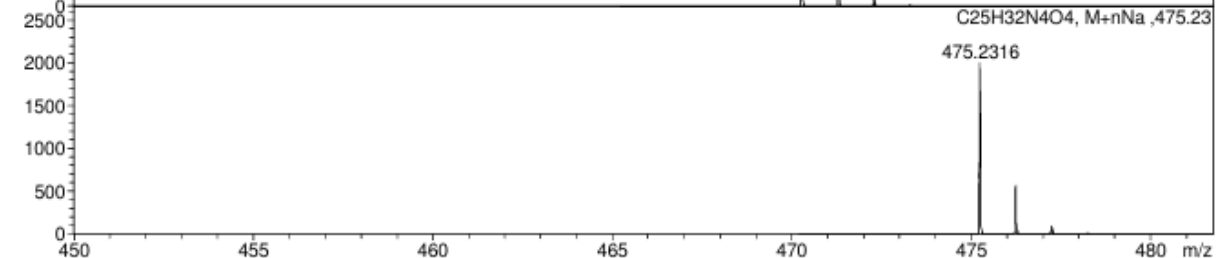

HRMS (ESI/Q-TOF) of 3-acetate 20-[3'-(5''-azide)isoxazole]-pregn-5-en-3 $\beta$ -ol-20-one (**3b**)

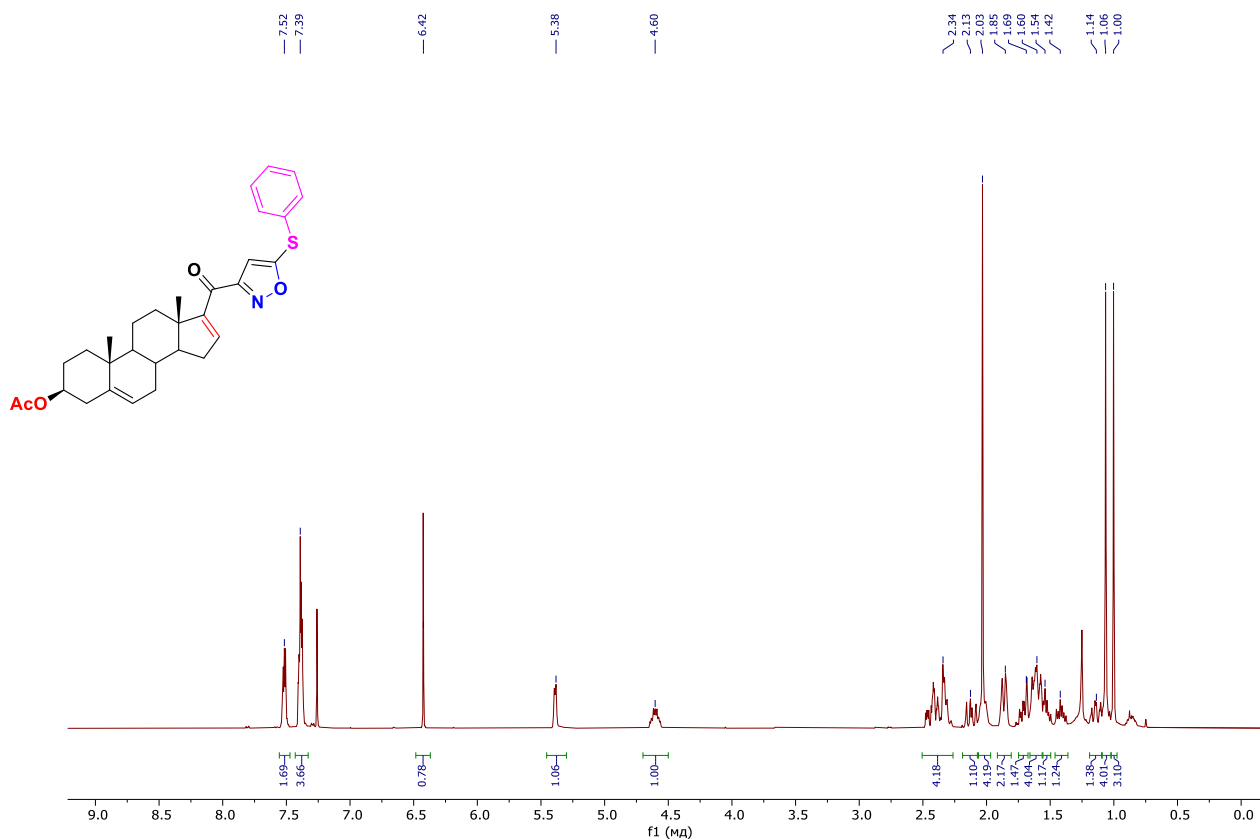

<sup>1</sup>H NMR (400 MHz, CDCl<sub>3</sub>) spectrum of 3-acetate 20-[3'-(5''-tiophenole)isoxazole]-pregn-5,16-dien-3 $\beta$ -ol-20-one (4a)

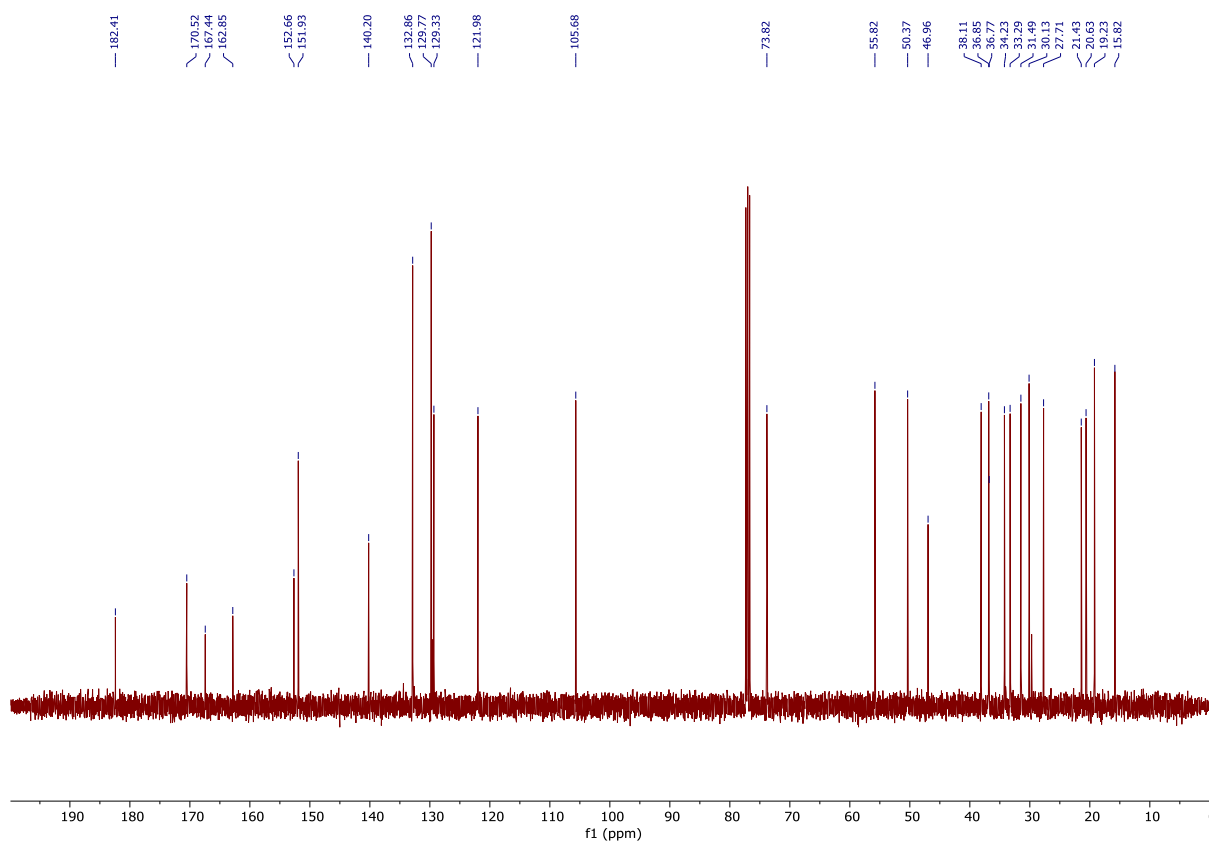

<sup>13</sup>C NMR (101 MHz, CDCl<sub>3</sub>) spectrum of 3-acetate 20-[3'-(5''-tiophenole)isoxazole]-pregn-5,16-dien-3 $\beta$ -ol-20-one (4a)

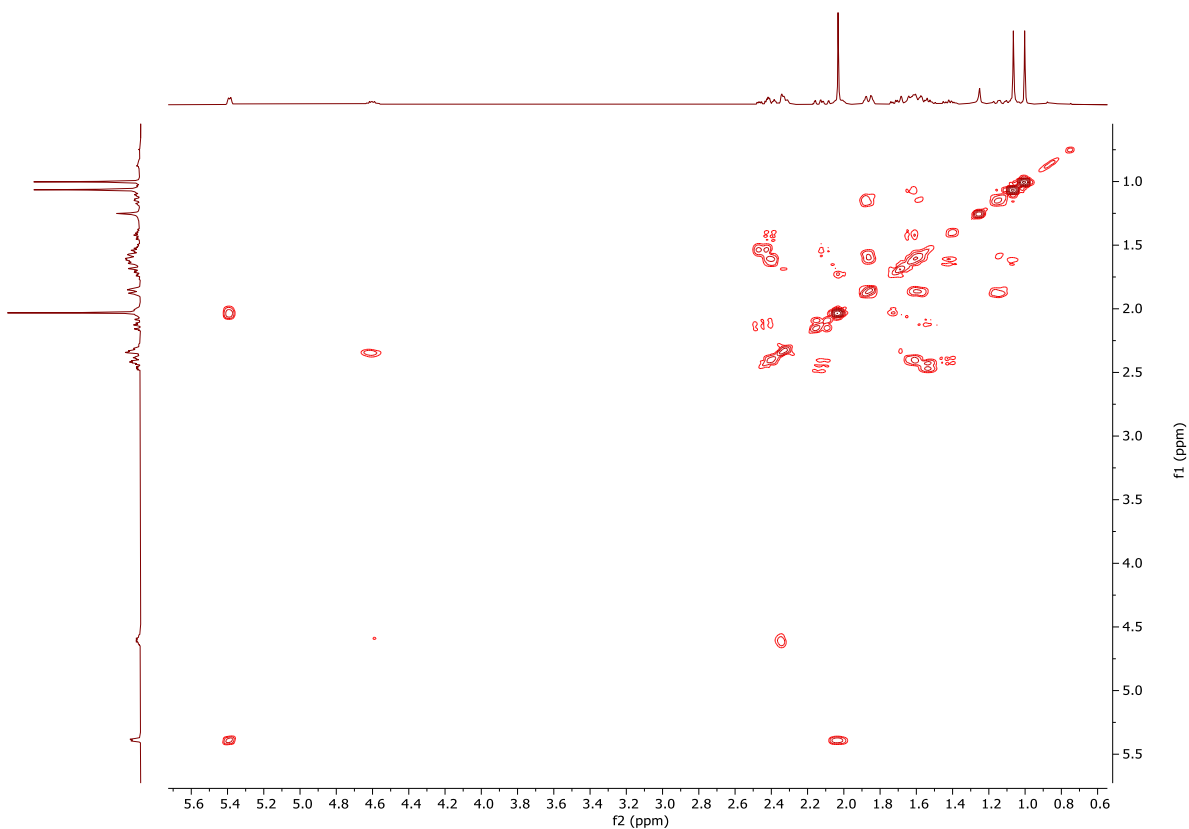

COSY spectrum of 3-acetate 20-[3`-(5``-tiophenole)isoxazole]-pregn-5,16-dien-3 $\beta$ -ol-20-one (**4a**)

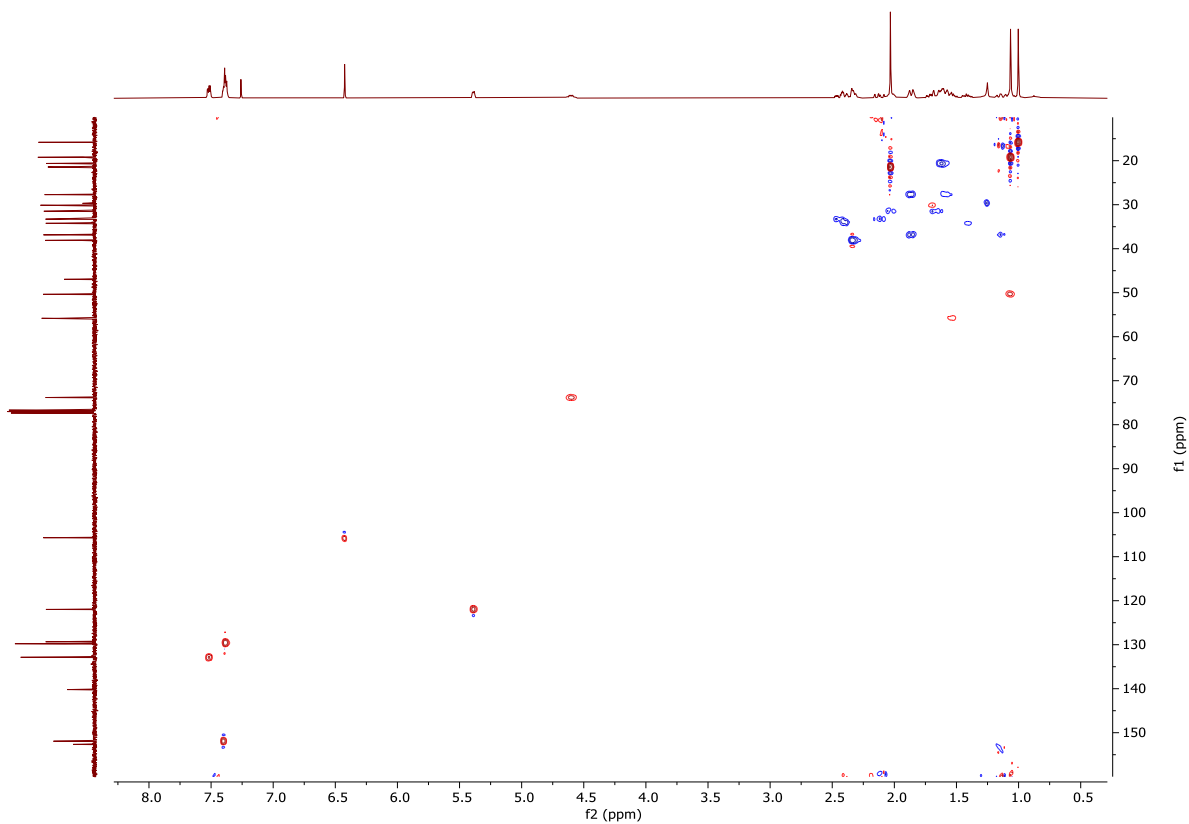

HSQC spectrum of 3-acetate 20-[3`-(5``-tiophenole)isoxazole]-pregn-5,16-dien-3 $\beta$ -ol-20-one (**4a**)

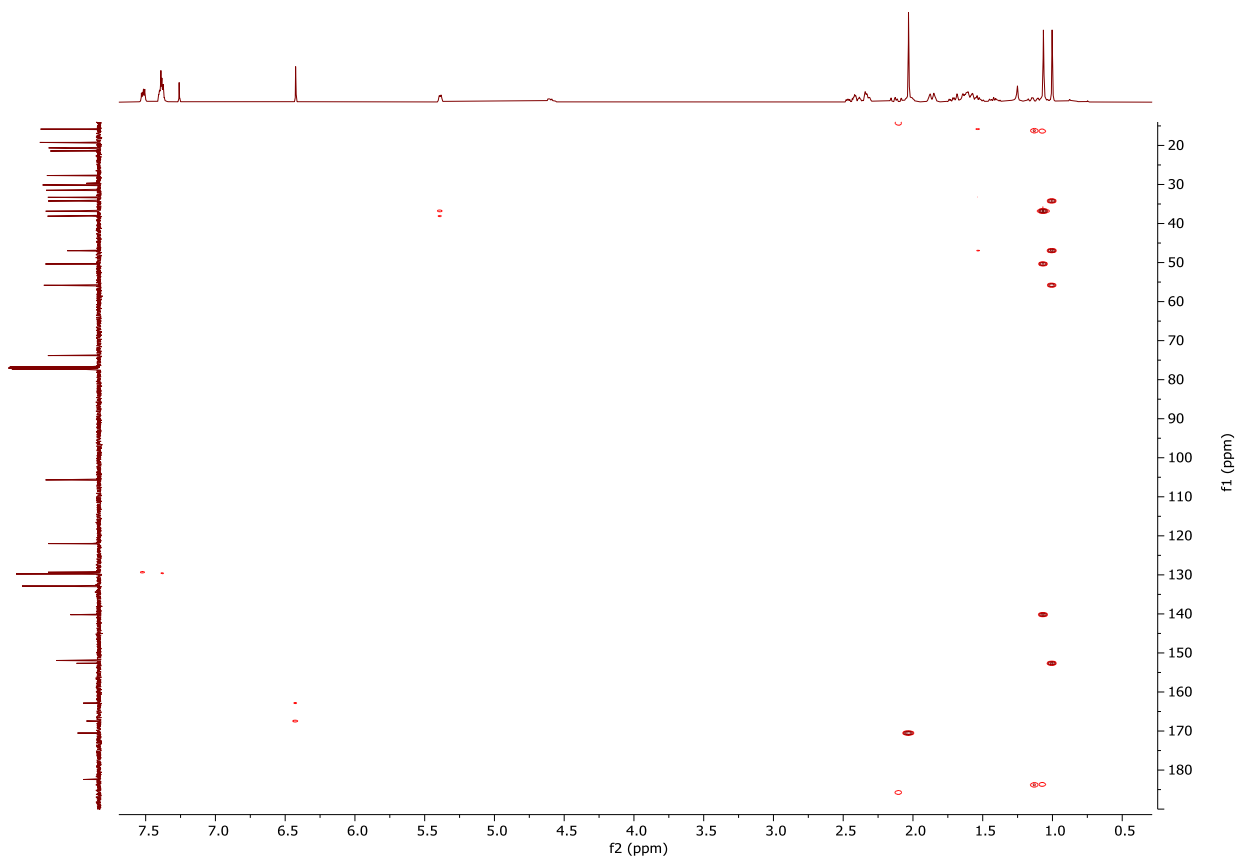

HMBC spectrum of 3-acetate 20-[3`-(5``-tiophenole)isoxazole]-pregn-5,16-dien-3 $\beta$ -ol-20-one (**4a**)

**Analysis Info**

Analysis Name D:\Data\Kolotyrkina\2023\Malahova\1102004.d  
Method tune\_low.m  
Sample Name /YUVA Vika-004f1  
Comment C31H35NO4S mH 518.2358 calibrant added CH3OH

Acquisition Date 02.11.2023 12:54:51  
Operator BDAL@DE  
Instrument / Ser# micrOTOF 10248

**Acquisition Parameter**

|             |            |                      |          |                  |           |
|-------------|------------|----------------------|----------|------------------|-----------|
| Source Type | ESI        | Ion Polarity         | Positive | Set Nebulizer    | 0.4 Bar   |
| Focus       | Not active |                      |          | Set Dry Heater   | 180 °C    |
| Scan Begin  | 50 m/z     | Set Capillary        | 4500 V   | Set Dry Gas      | 4.0 l/min |
| Scan End    | 3000 m/z   | Set End Plate Offset | -500 V   | Set Divert Valve | Waste     |

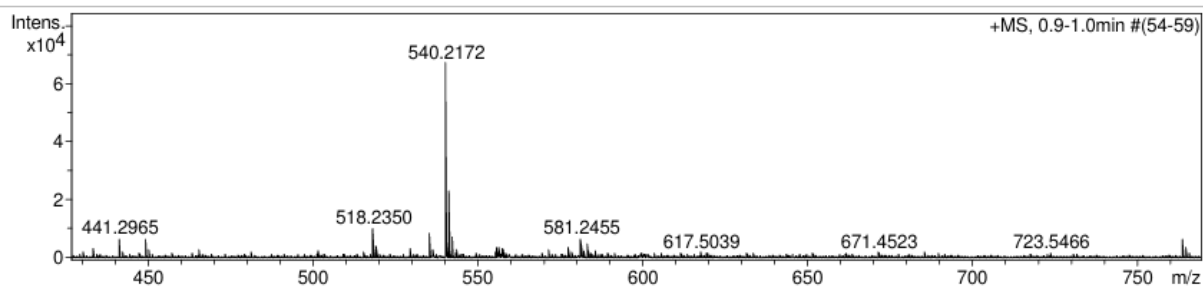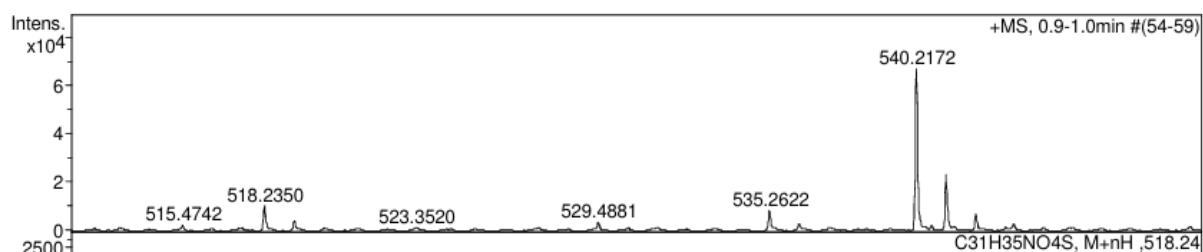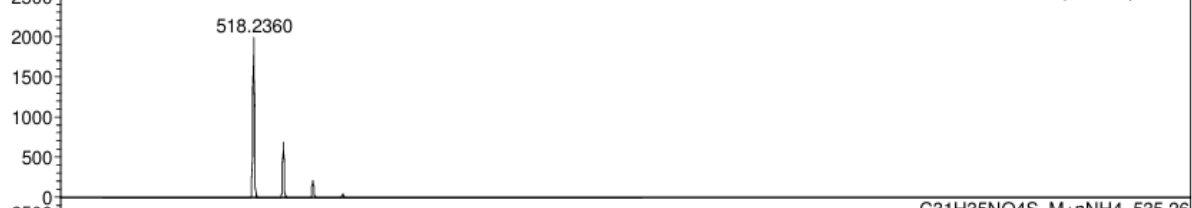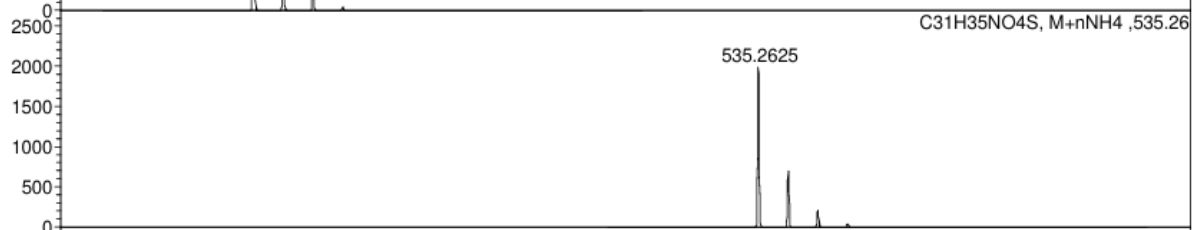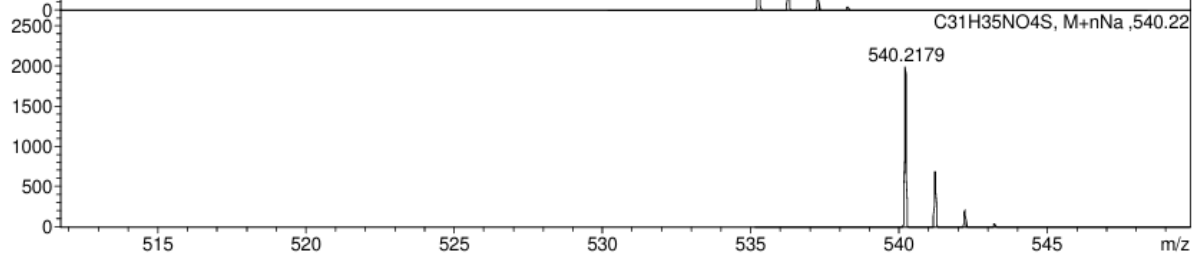

HRMS (ESI/Q-TOF) of 3-acetate 20-[3'-(5''-tiophenole)isoxazole]-pregn-5,16-dien-3 $\beta$ -ol-20-one (**4a**)

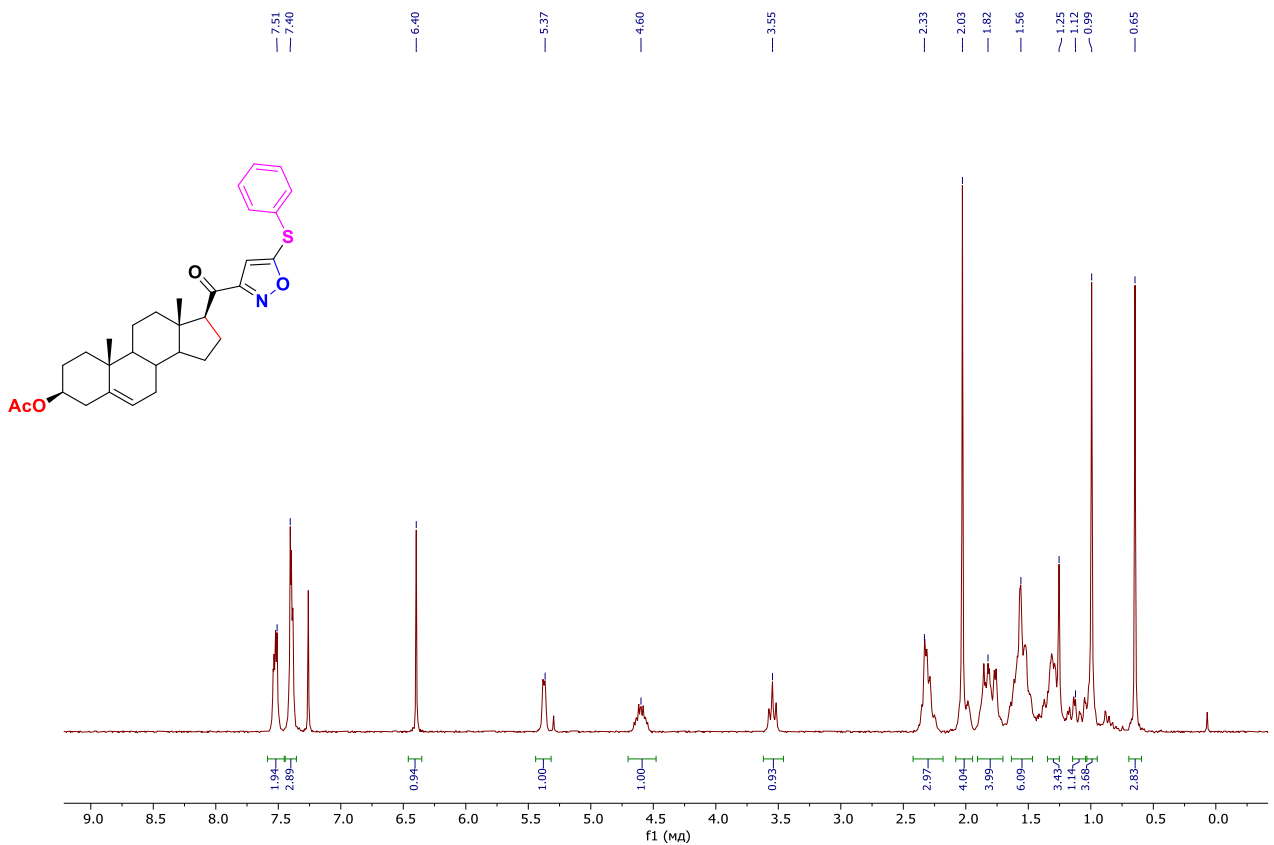

<sup>1</sup>H NMR (CDCl<sub>3</sub>, 300 MHz) spectrum of 3-acetate 20-[3'-(5''-tiophenole)isoxazole]-pregn-5-en-3β-ol-20-one (4b)

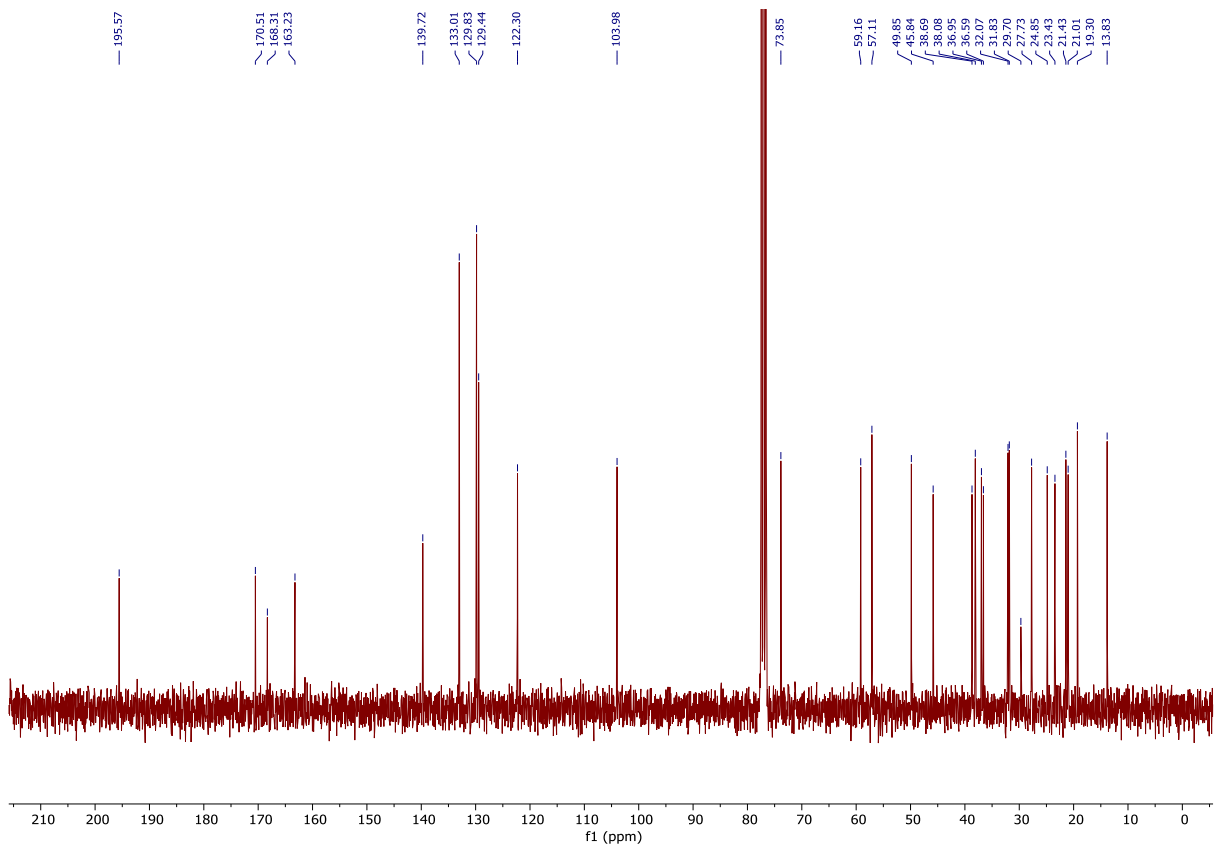

<sup>13</sup>C NMR (CDCl<sub>3</sub>, 75 MHz) spectrum of 3-acetate 20-[3'-(5''-tiophenole)isoxazole]-pregn-5-en-3β-ol-20-one (4b)

**Analysis Info**

Analysis Name D:\Data\Kolotyrkina\2024\Volkova\0221020.d  
Method tune\_low.m  
Sample Name /YUVA Mavi-188f1  
Comment C31H37NO4S mH520.2516 calbrant added CH3CN

Acquisition Date 21.02.2024 15:58:23  
Operator BDAL@DE  
Instrument / Ser# micrOTOF 10248

**Acquisition Parameter**

|             |            |                      |          |                  |           |
|-------------|------------|----------------------|----------|------------------|-----------|
| Source Type | ESI        | Ion Polarity         | Positive | Set Nebulizer    | 0.4 Bar   |
| Focus       | Not active |                      |          | Set Dry Heater   | 180 °C    |
| Scan Begin  | 50 m/z     | Set Capillary        | 4500 V   | Set Dry Gas      | 4.0 l/min |
| Scan End    | 3000 m/z   | Set End Plate Offset | -500 V   | Set Divert Valve | Waste     |

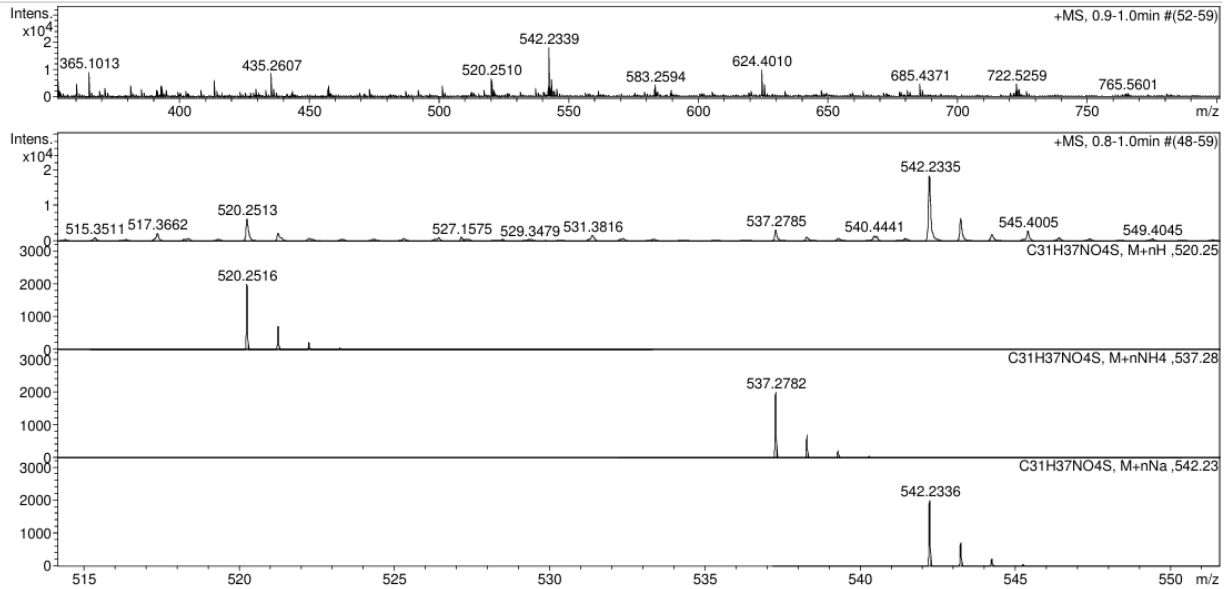

HRMS (ESI/Q-TOF) of 3-acetate 20-[3`-(5``-tiophenole)isoxazole]-pregn-5-en-3β-ol-20-one (**4b**)

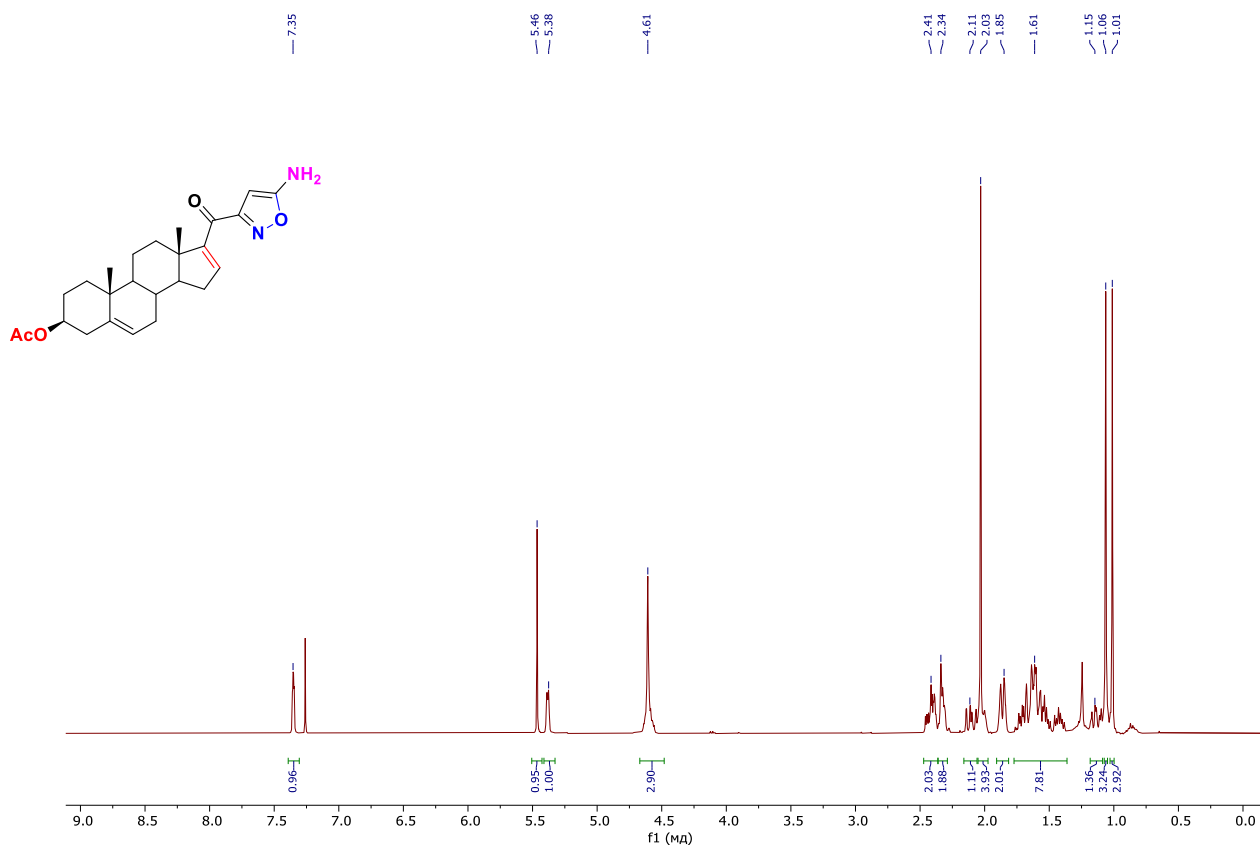

$^1\text{H}$  NMR ( $\text{CDCl}_3$ , 300 MHz) spectrum of 3-acetate 20-[3'-(5''-amine)isoxazole]-pregn-5,16-dien-3 $\beta$ -ol-20-one (5a)

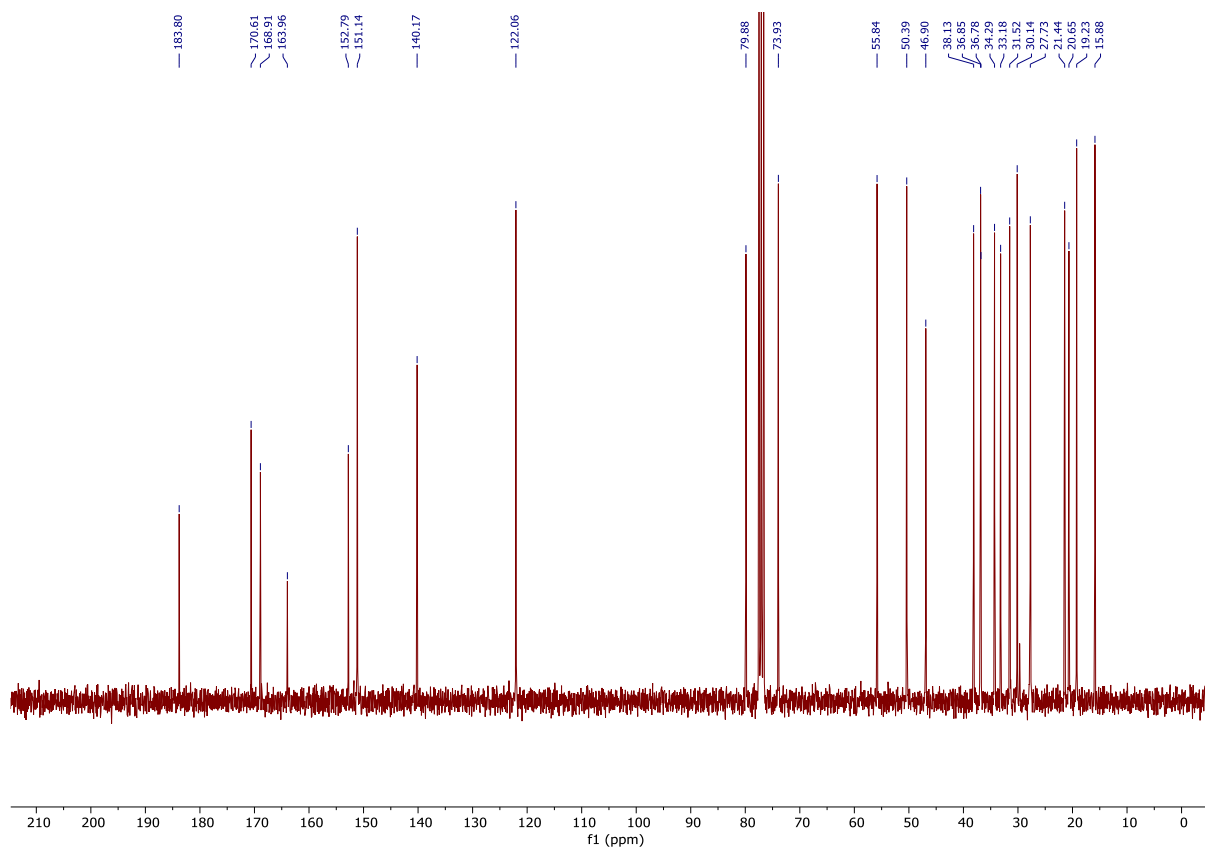

$^{13}\text{C}$  NMR ( $\text{CDCl}_3$ , 75 MHz) spectrum of 3-acetate 20-[3'-(5''-amine)isoxazole]-pregn-5,16-dien-3 $\beta$ -ol-20-one (5a)

**Analysis Info**

Analysis Name D:\Data\Kolotyrkina\2024\Volkova\0208041.d  
Method tune\_low.m  
Sample Name /YUVA vika-19f1  
Comment C25H32N2O4 mH425.2534 calibrant added CH3OH

Acquisition Date 08.02.2024 17:58:18  
Operator BDAL@DE  
Instrument / Ser# micrOTOF 10248

**Acquisition Parameter**

|             |            |                      |          |                  |           |
|-------------|------------|----------------------|----------|------------------|-----------|
| Source Type | ESI        | Ion Polarity         | Positive | Set Nebulizer    | 0.4 Bar   |
| Focus       | Not active |                      |          | Set Dry Heater   | 180 °C    |
| Scan Begin  | 50 m/z     | Set Capillary        | 4500 V   | Set Dry Gas      | 4.0 l/min |
| Scan End    | 3000 m/z   | Set End Plate Offset | -500 V   | Set Divert Valve | Waste     |

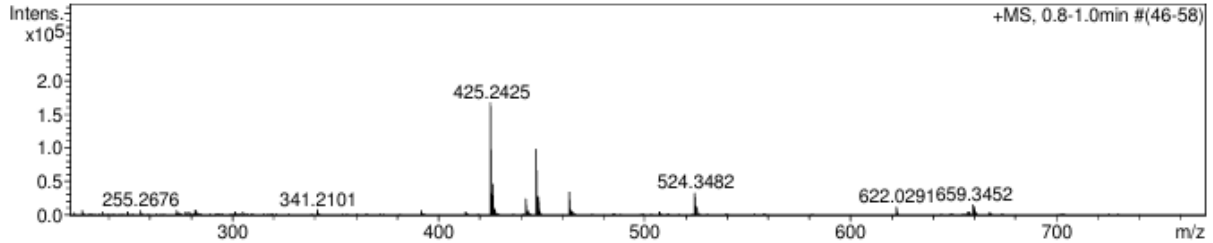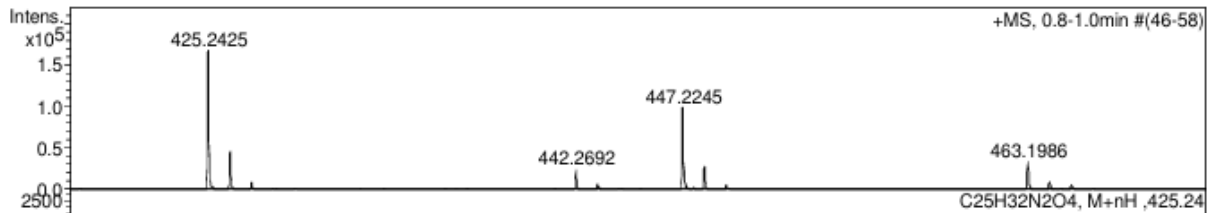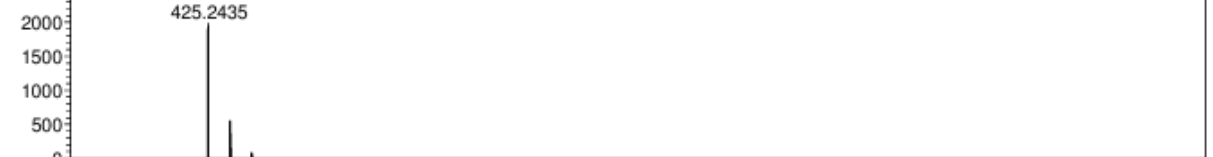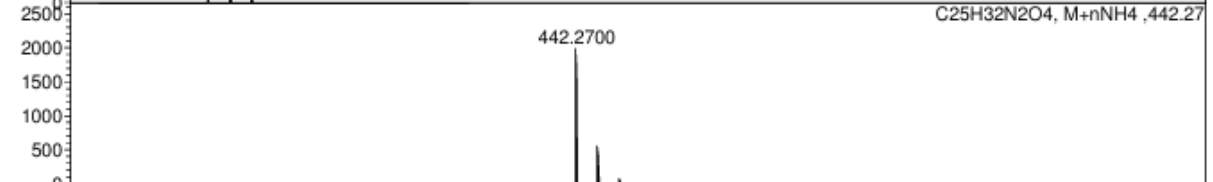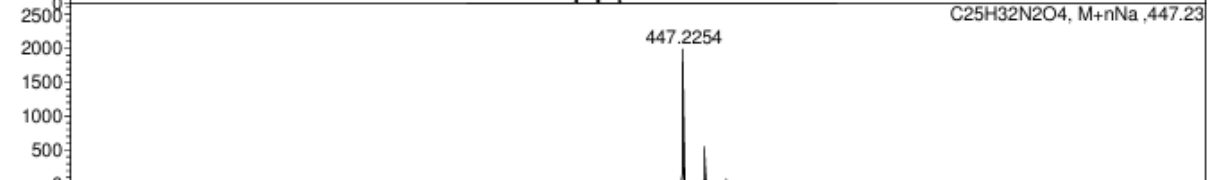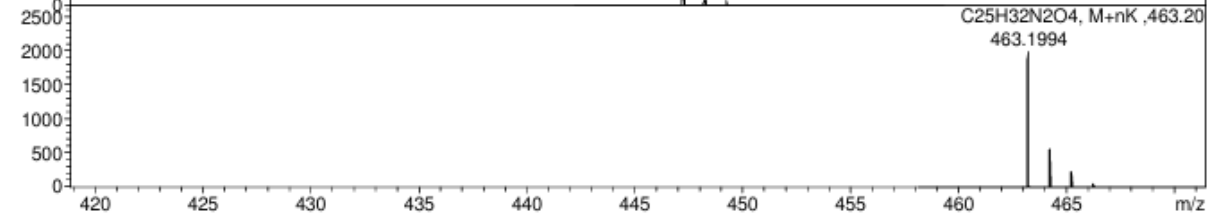

HRMS (ESI/Q-TOF) of 3-acetate 20-[3'-(5''-amine)isoxazole]-pregn-5,16-dien-3β-ol-20-one (5a)

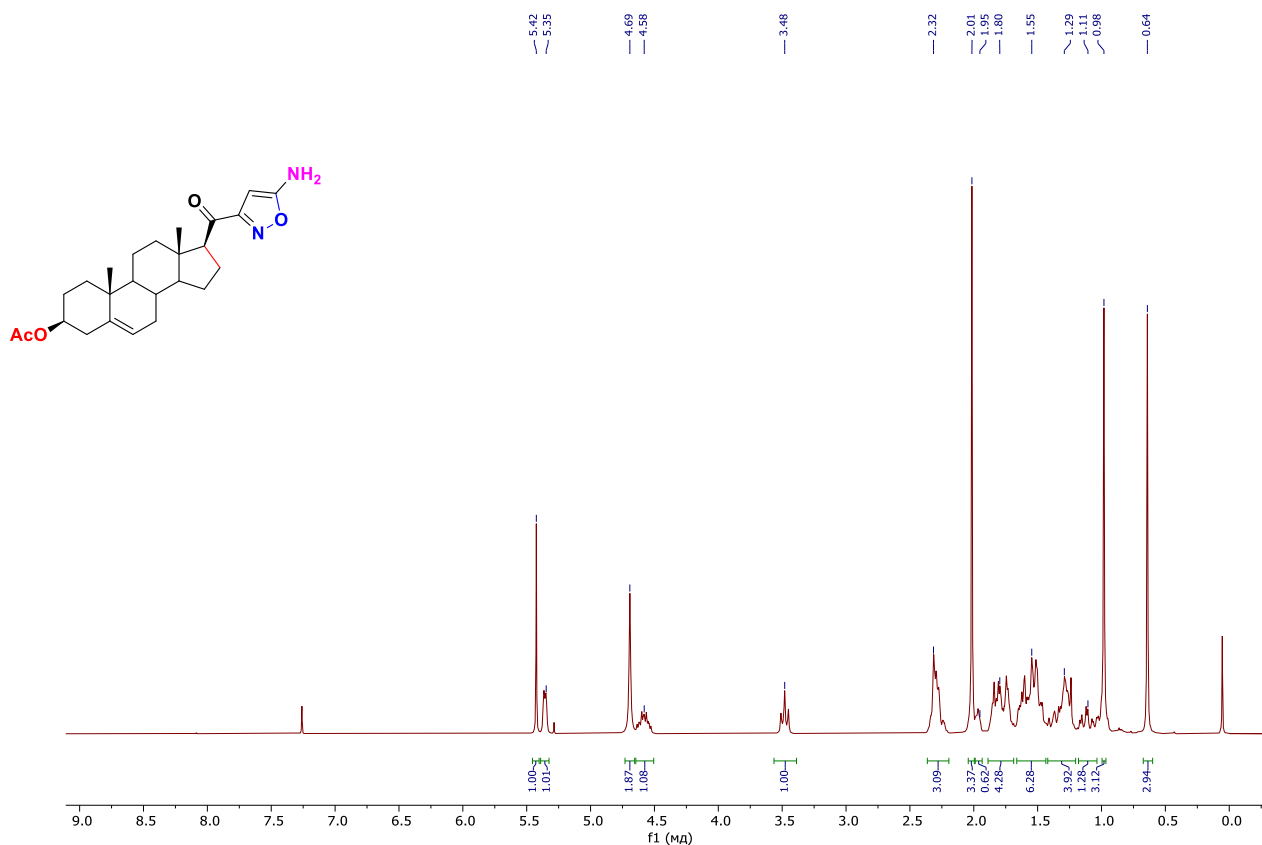

<sup>1</sup>H NMR (CDCl<sub>3</sub>, 300 MHz) spectrum of 3-acetate 20-[3'-(5''-amine)isoxazole]-pregn-5-en-3β-ol-20-one (5b)

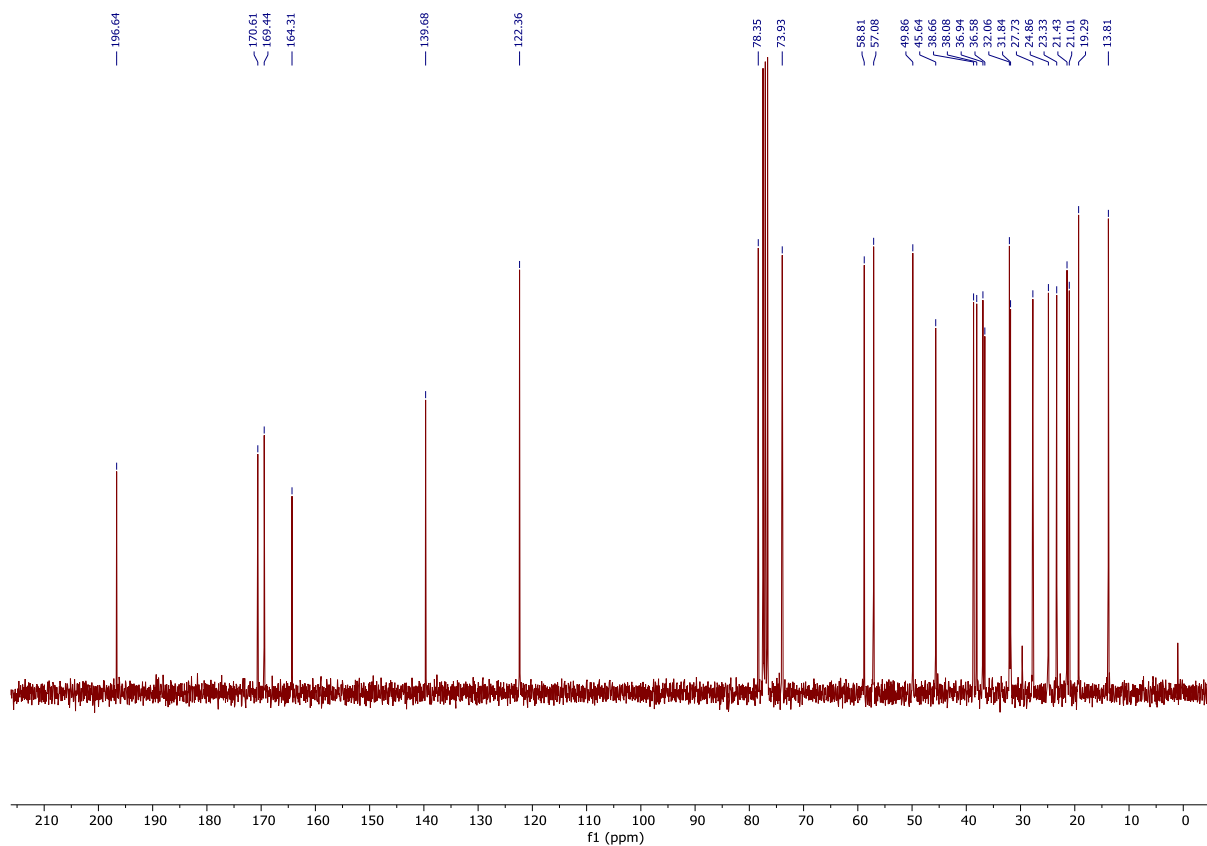

<sup>13</sup>C NMR (CDCl<sub>3</sub>, 75 MHz) spectrum of 3-acetate 20-[3'-(5''-amine)isoxazole]-pregn-5-en-3β-ol-20-one (5b)

**Analysis Info**

Analysis Name D:\Data\Kolotyrkina\2024\Volkova\0228019.d  
Method tune\_low.m  
Sample Name /YUVA MaVi-189f2  
Comment C25H34N2O4 mH427.2591 calibrant added CH3CN

Acquisition Date 28.02.2024 16:26:56

Operator BDAL@DE  
Instrument / Ser# micrOTOF 10248

**Acquisition Parameter**

|             |            |                      |          |                  |           |
|-------------|------------|----------------------|----------|------------------|-----------|
| Source Type | ESI        | Ion Polarity         | Positive | Set Nebulizer    | 0.4 Bar   |
| Focus       | Not active |                      |          | Set Dry Heater   | 180 °C    |
| Scan Begin  | 50 m/z     | Set Capillary        | 4500 V   | Set Dry Gas      | 4.0 l/min |
| Scan End    | 3000 m/z   | Set End Plate Offset | -500 V   | Set Divert Valve | Waste     |

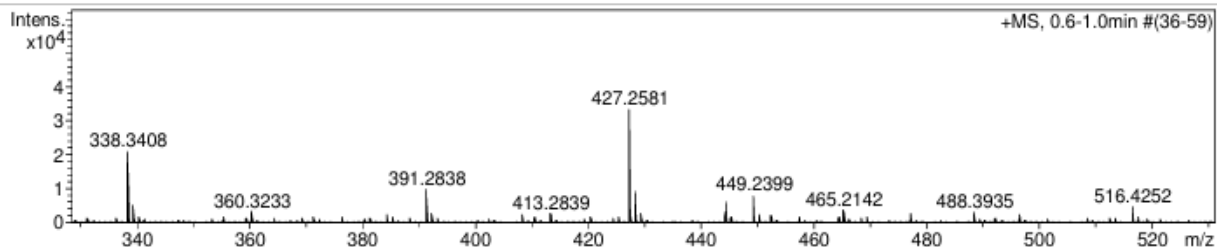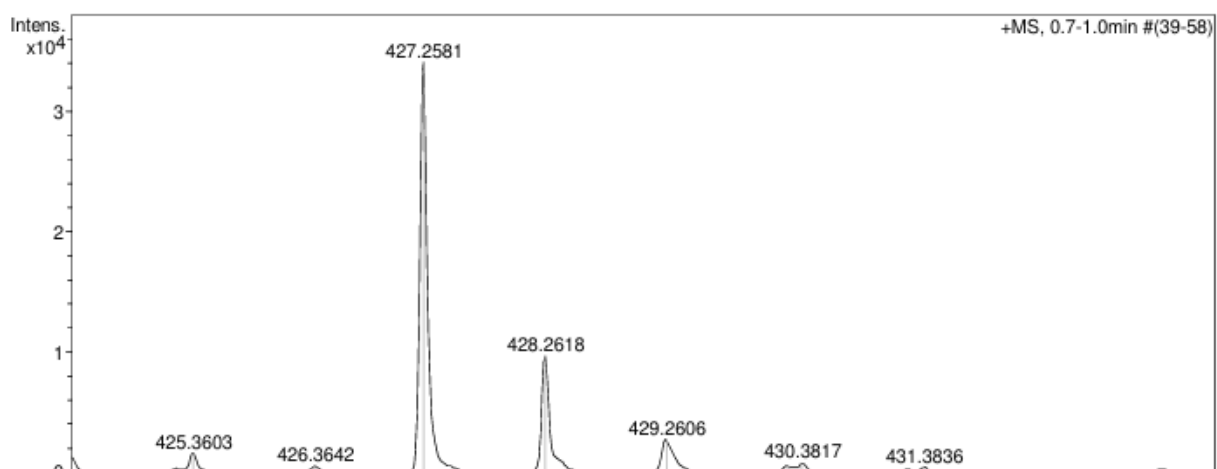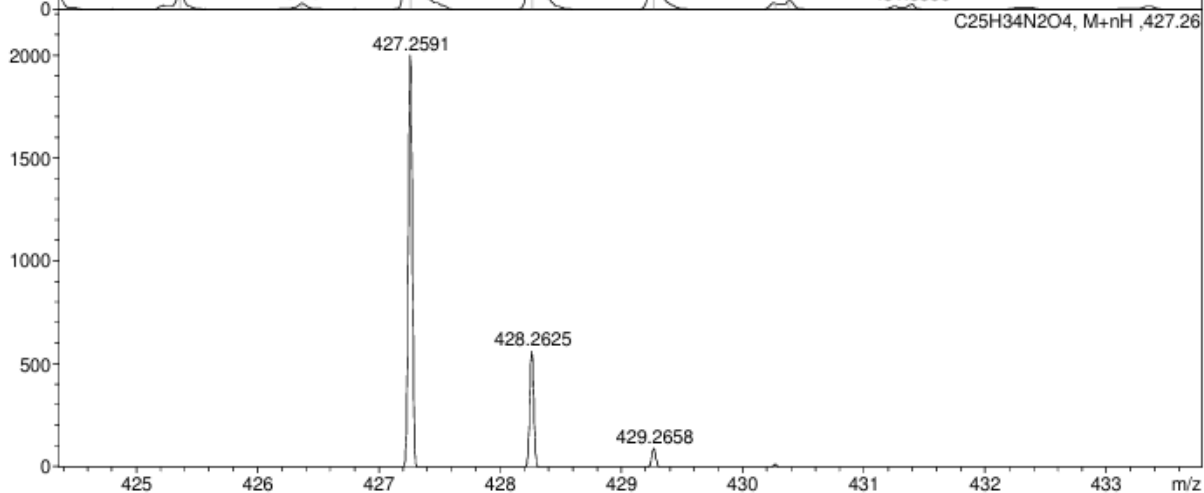

HRMS (ESI/Q-TOF) of 3-acetate 20-[3`-(5``-amine)isoxazole]-pregn-5-en-3β-ol-20-one (5b)

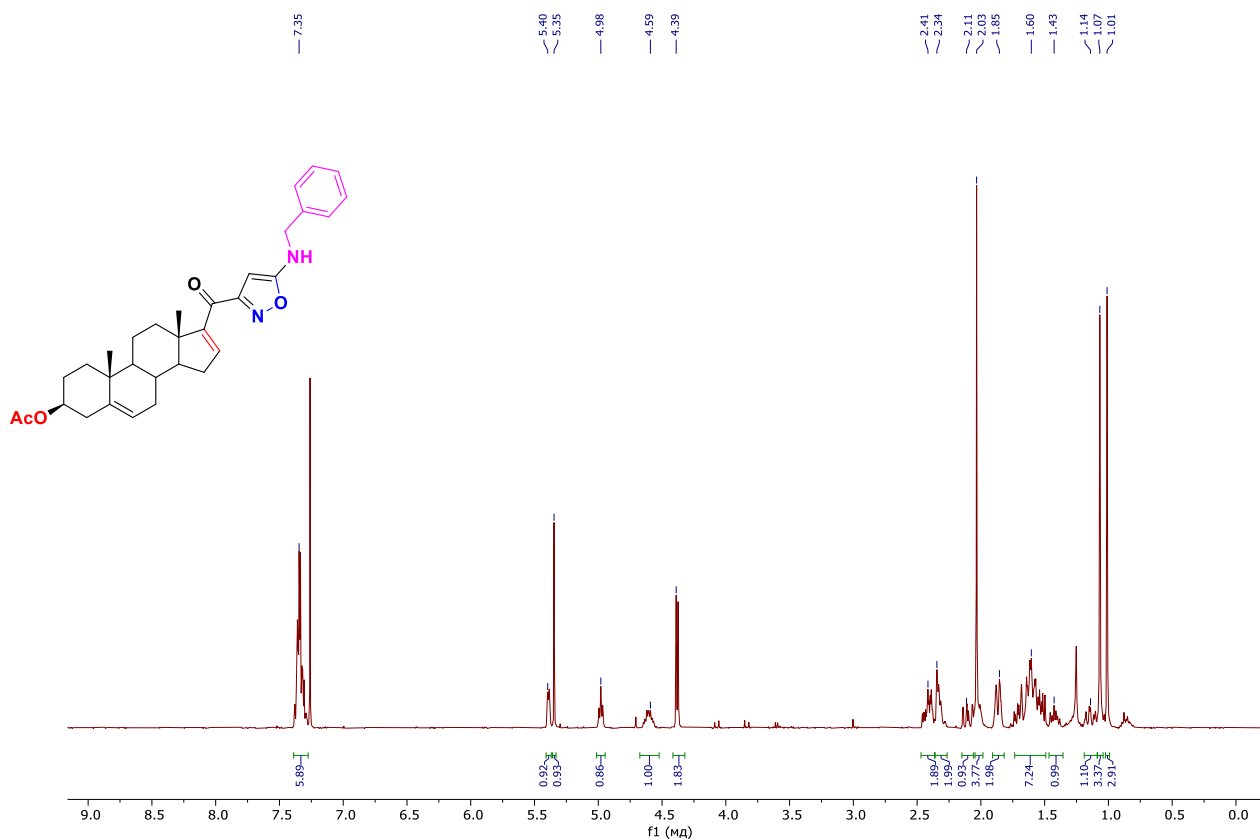

$^1\text{H}$  NMR (300 MHz,  $\text{CDCl}_3$ ) spectrum of 3-acetate 20-[3''-(5'-benzylamine)isoxazole]-pregn-5,16-dien-3 $\beta$ -ol-20-one (7a)

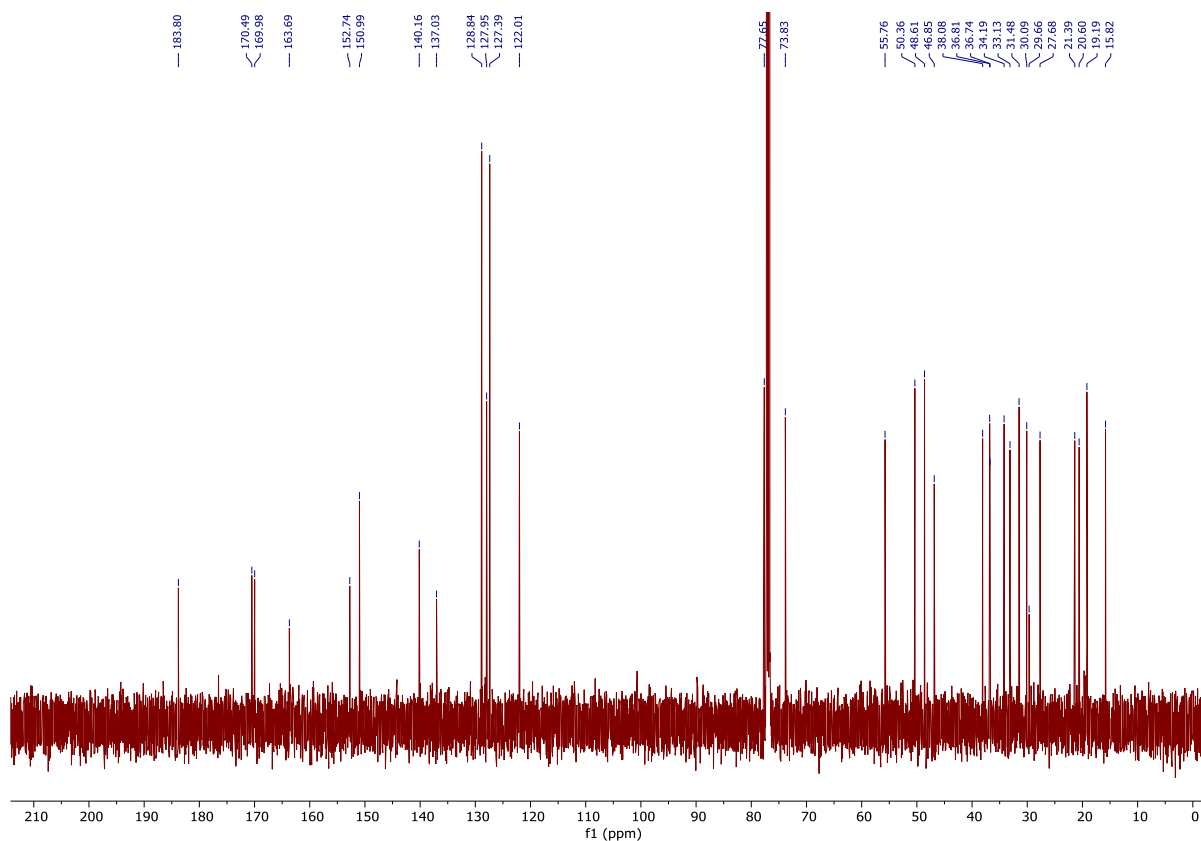

$^{13}\text{C}$  NMR (75 MHz,  $\text{CDCl}_3$ ) spectrum of 3-acetate 20-[3''-(5'-benzylamine)isoxazole]-pregn-5,16-dien-3 $\beta$ -ol-20-one (7a)

**Analysis Info**

Analysis Name D:\Data\Kolotyrkina\2023\Malahova\1130027.d  
Method tune\_low.m  
Sample Name /YUVA vika-008f4  
Comment C32H38N2O4 mH 515.2904 calibrant added CH3OH

Acquisition Date 30.11.2023 15:42:58  
Operator BDAL@DE  
Instrument / Ser# micrOTOF 10248

**Acquisition Parameter**

|             |            |                      |          |                  |           |
|-------------|------------|----------------------|----------|------------------|-----------|
| Source Type | ESI        | Ion Polarity         | Positive | Set Nebulizer    | 0.4 Bar   |
| Focus       | Not active |                      |          | Set Dry Heater   | 180 °C    |
| Scan Begin  | 50 m/z     | Set Capillary        | 4500 V   | Set Dry Gas      | 4.0 l/min |
| Scan End    | 3000 m/z   | Set End Plate Offset | -500 V   | Set Divert Valve | Waste     |

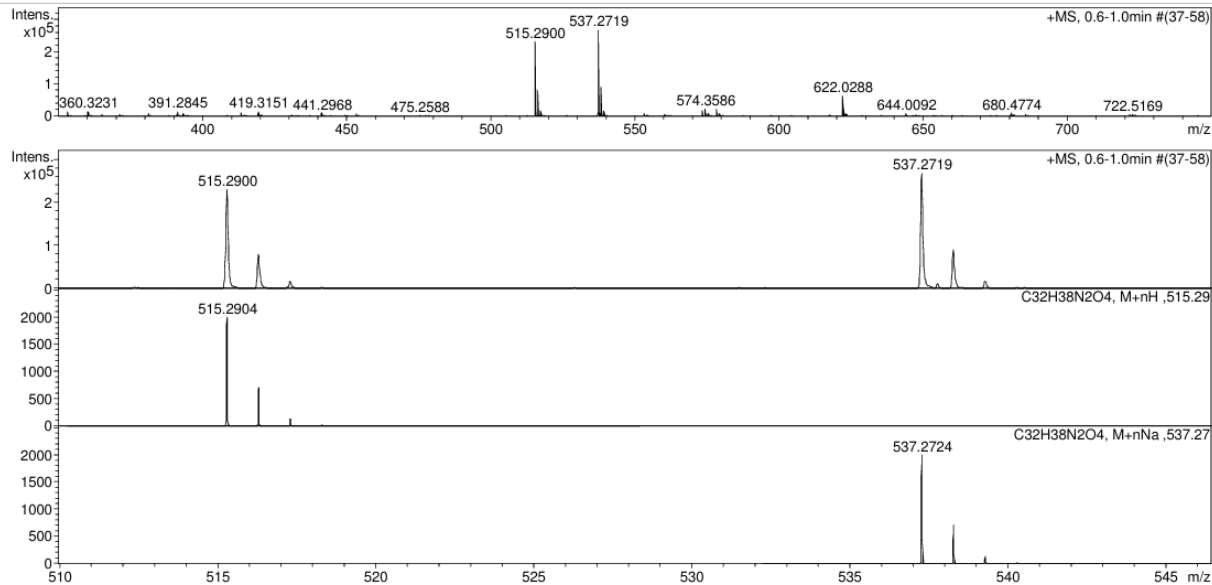

HRMS (ESI/Q-TOF) of 3-acetate 20-[3''-(5'-benzylamine)isoxazole]-pregn-5,16-dien-3 $\beta$ -ol-20-one (**7a**)

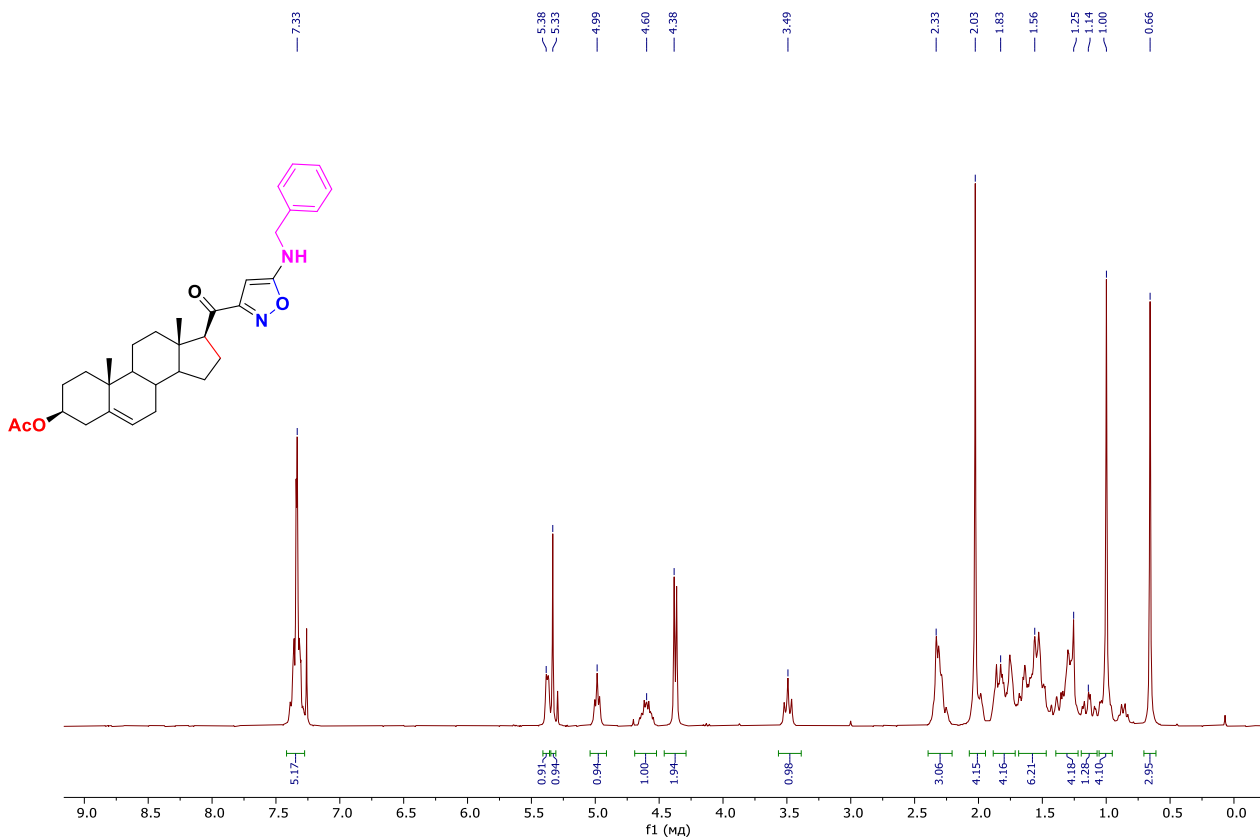

<sup>1</sup>H NMR (CDCl<sub>3</sub>, 300 MHz) spectrum of 3-acetate 20-[3'-(5''-benzylamine)isoxazole]-pregna-5-en-3β-ol-20-one (7b)

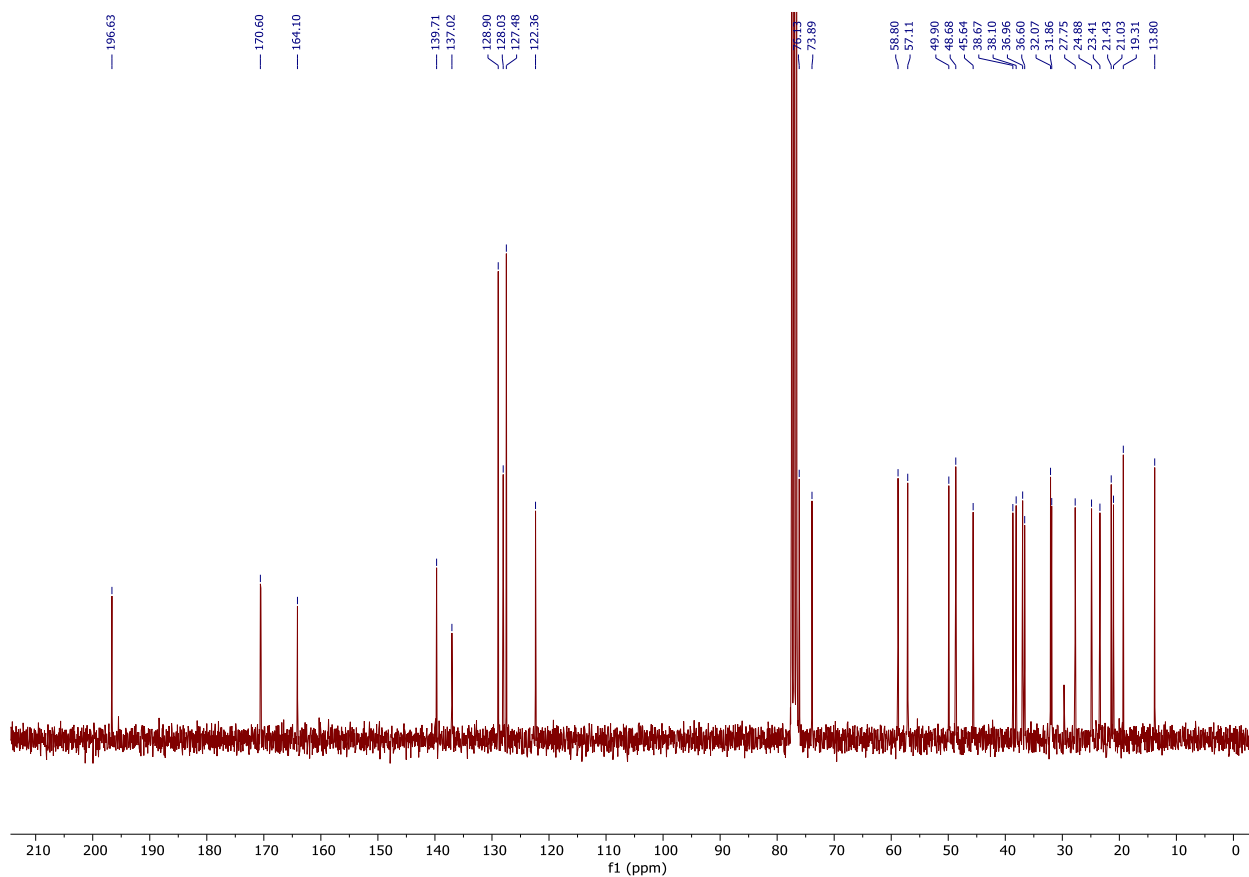

<sup>13</sup>C NMR (CDCl<sub>3</sub>, 75 MHz) spectrum of 3-acetate 20-[3'-(5''-benzylamine)isoxazole]-pregna-5-en-3β-ol-20-one (7b)

**Analysis Info**

Analysis Name D:\Data\Kolotyrkina\2024\Volkova\0221019.d  
Method tune\_low.m  
Sample Name /YUVA Mavi-186f2  
Comment C32H40N2O4 mH517.3060 calibrant added CH3CN

Acquisition Date 21.02.2024 15:52:09  
Operator BDAL@DE  
Instrument / Ser# micrOTOF 10248

**Acquisition Parameter**

|             |            |                      |          |                  |           |
|-------------|------------|----------------------|----------|------------------|-----------|
| Source Type | ESI        | Ion Polarity         | Positive | Set Nebulizer    | 0.4 Bar   |
| Focus       | Not active |                      |          | Set Dry Heater   | 180 °C    |
| Scan Begin  | 50 m/z     | Set Capillary        | 4500 V   | Set Dry Gas      | 4.0 l/min |
| Scan End    | 3000 m/z   | Set End Plate Offset | -500 V   | Set Divert Valve | Waste     |

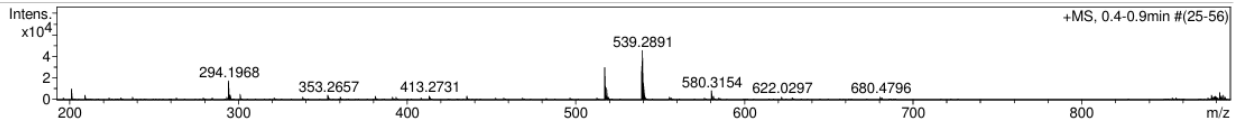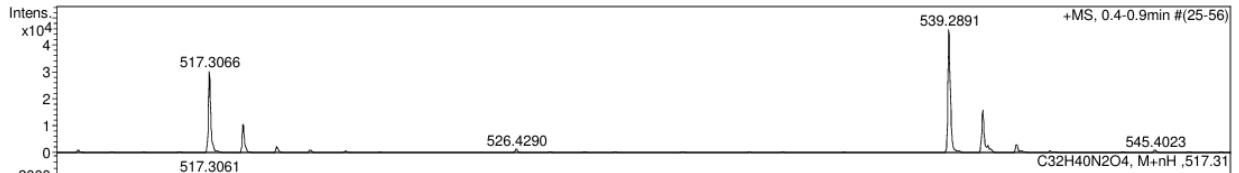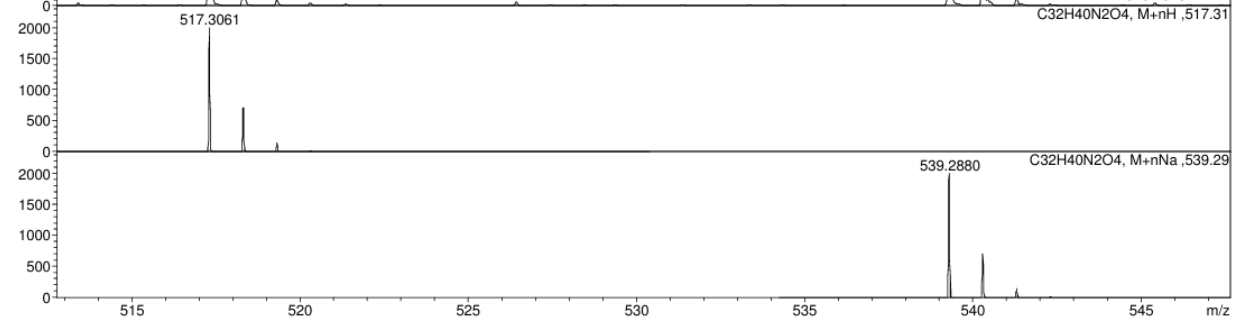

HRMS (ESI/Q-TOF) of 3-acetate 20-[3'-(5''-benzylamine)isoxazole]-pregna-5-en-3 $\beta$ -ol-20-one (**7b**)

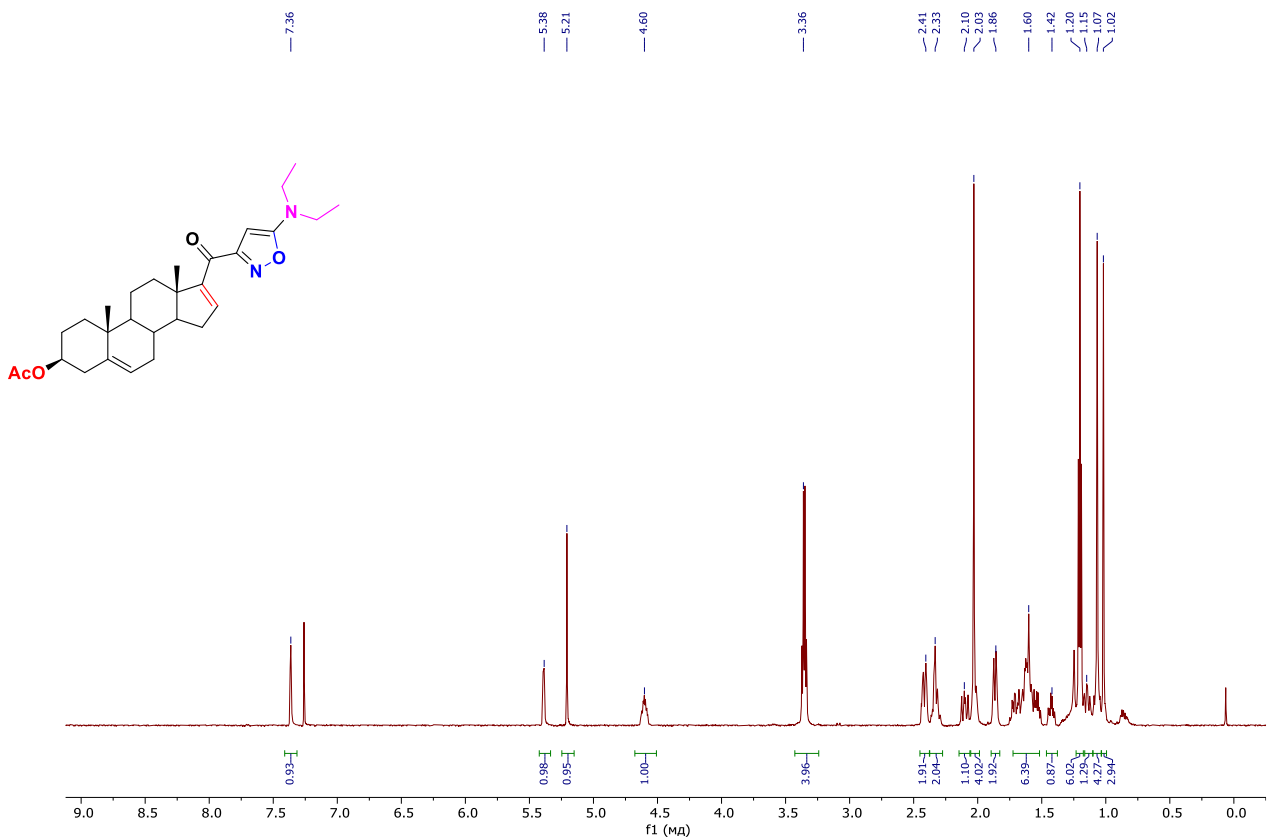

<sup>1</sup>H NMR (600 MHz, CDCl<sub>3</sub>) spectrum of 3-acetate 20-[3'-(5''-diethylamine)isoxazole]-pregn-5,16-dien-3β-ol-20-one (7c)

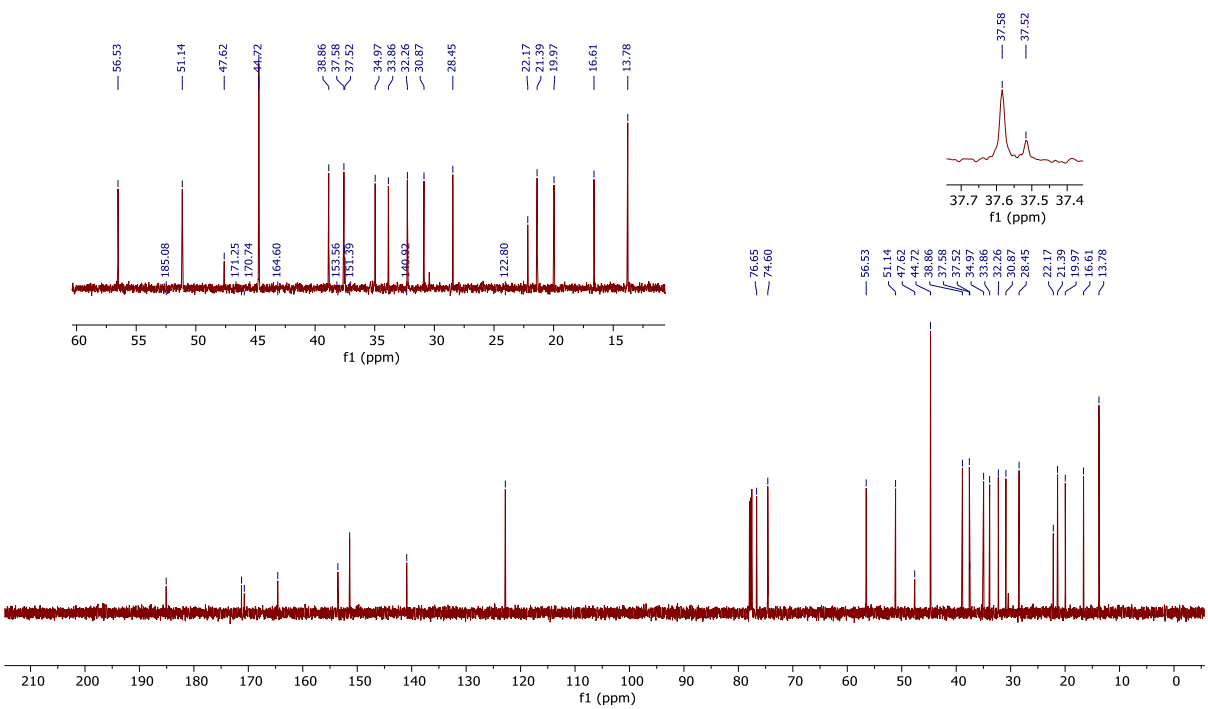

<sup>13</sup>C NMR (151 MHz, CDCl<sub>3</sub>) spectrum of 3-acetate 20-[3'-(5''-diethylamine)isoxazole]-pregn-5,16-dien-3β-ol-20-one (7c)

**Analysis Info**

Analysis Name D:\Data\Kolotyrkina\2023\Malahova\1130028.d  
Method tune\_low.m  
Sample Name /YUVA vika-10f1  
Comment C29H40N2O4 mH 481.3060 calibrant added CH3OH

Acquisition Date 30.11.2023 15:48:47  
Operator BDAL@DE  
Instrument / Ser# micrOTOF 10248

**Acquisition Parameter**

|             |            |                      |          |                  |           |
|-------------|------------|----------------------|----------|------------------|-----------|
| Source Type | ESI        | Ion Polarity         | Positive | Set Nebulizer    | 0.4 Bar   |
| Focus       | Not active |                      |          | Set Dry Heater   | 180 °C    |
| Scan Begin  | 50 m/z     | Set Capillary        | 4500 V   | Set Dry Gas      | 4.0 l/min |
| Scan End    | 3000 m/z   | Set End Plate Offset | -500 V   | Set Divert Valve | Waste     |

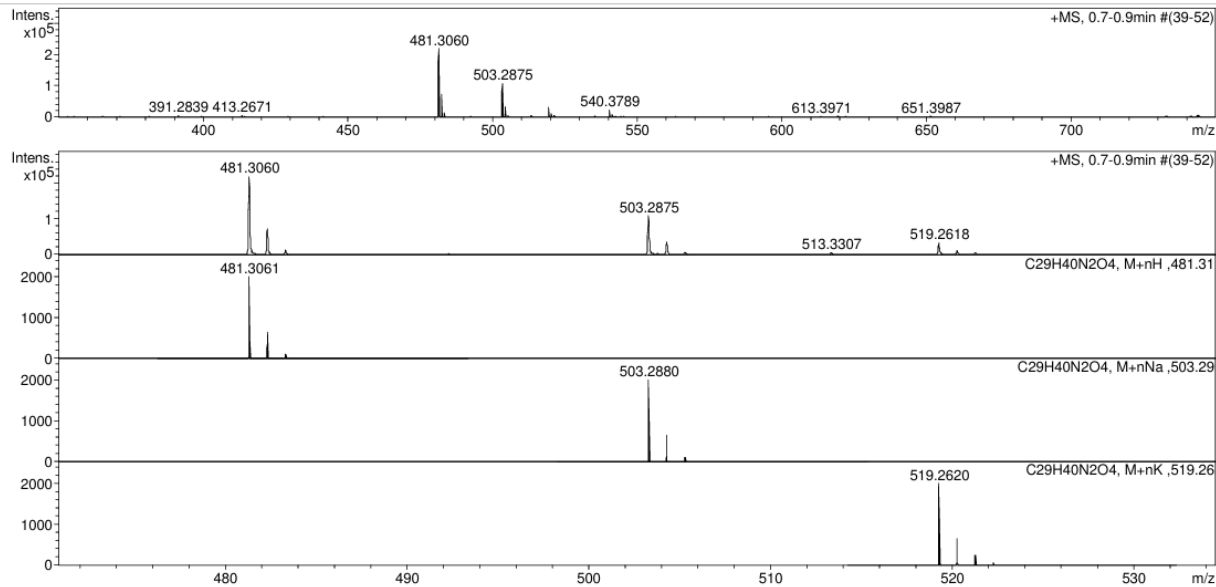

HRMS (ESI/Q-TOF) of 3-acetate 20-[3`-(5``-diethylamine)isoxazole]-pregn-5,16-dien-3 $\beta$ -ol-20-one (**7c**)

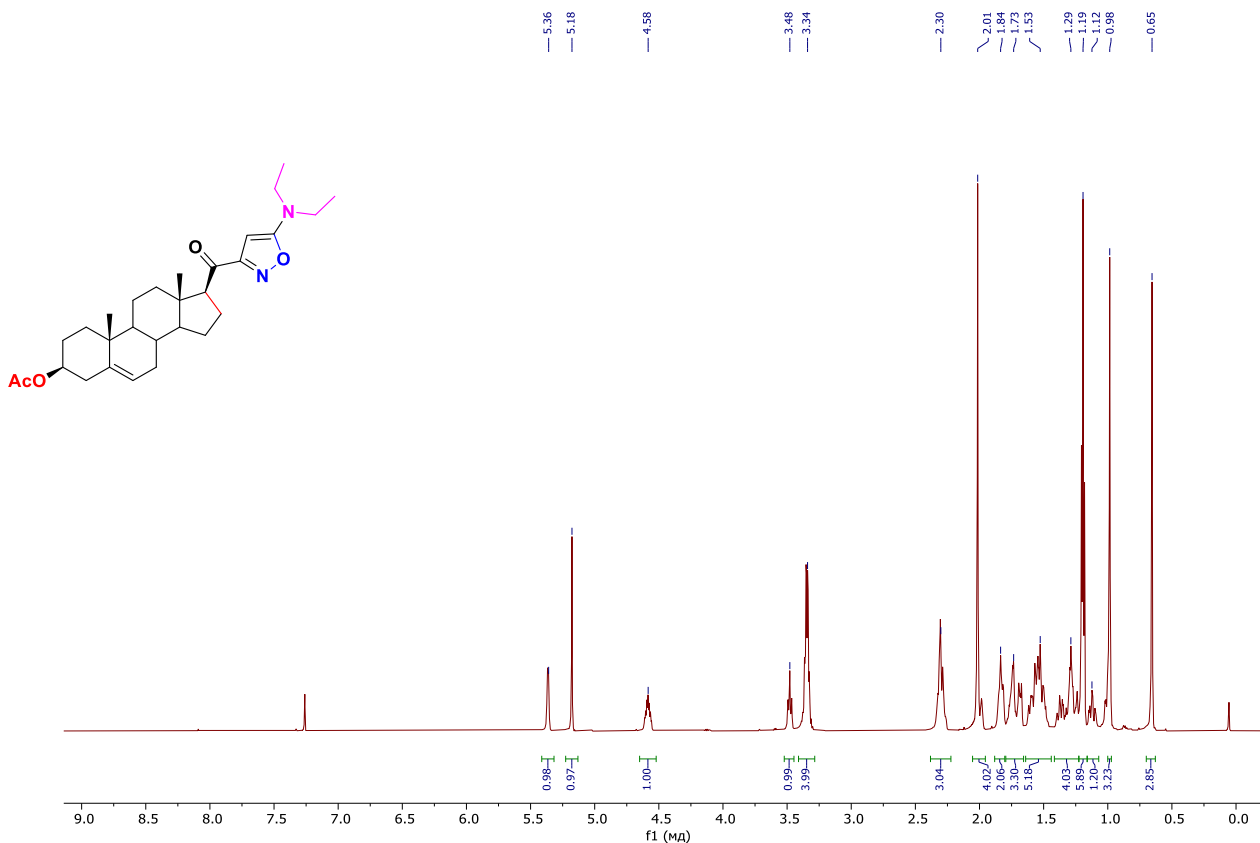

<sup>1</sup>H NMR (CDCl<sub>3</sub>, 600 MHz) spectrum of 3-acetate 20-(5'-diethylamineisoxazole)-pregna-5-en-3β-ol-20-one (7d)

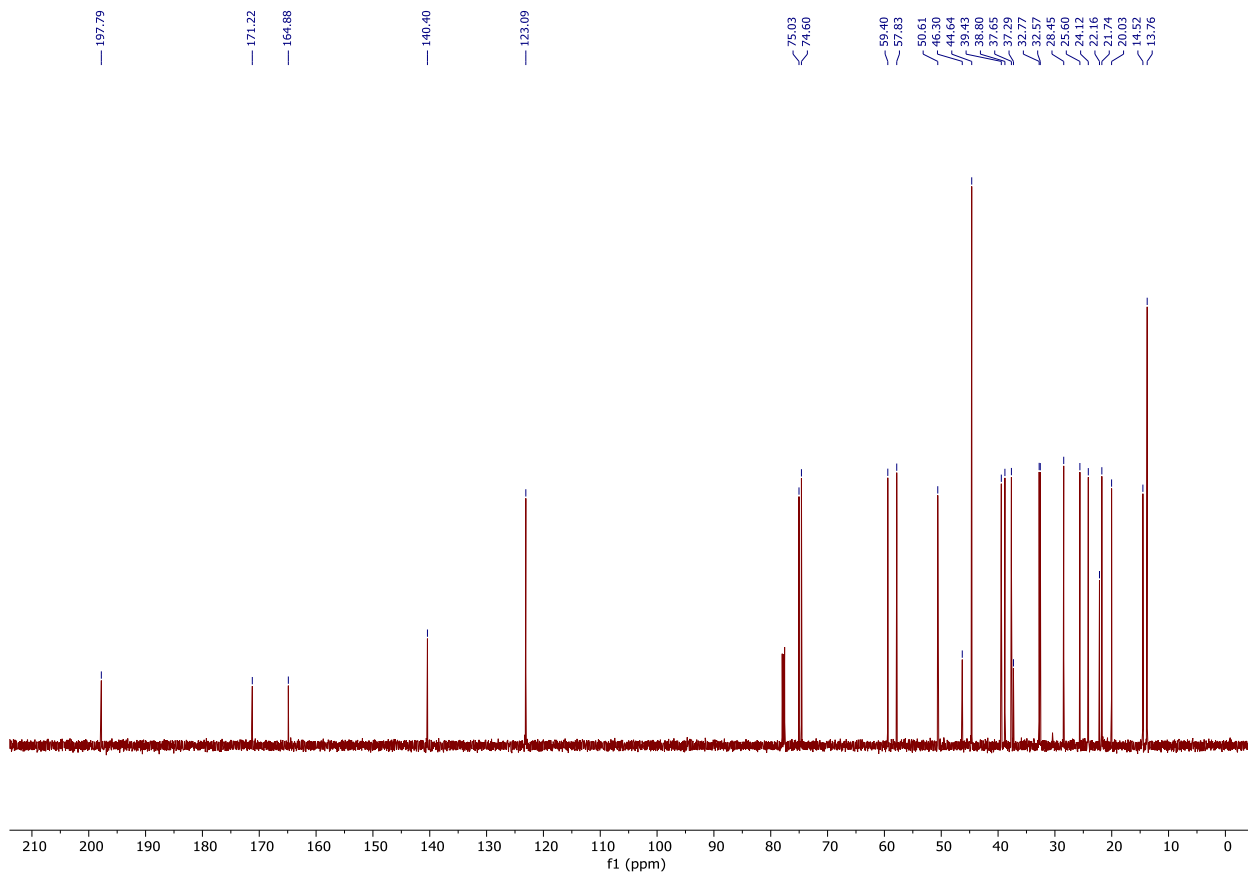

<sup>13</sup>C NMR (CDCl<sub>3</sub>, 151 MHz) spectrum of 3-acetate 20-(5'-diethylamineisoxazole)-pregna-5-en-3β-ol-20-one (7d)

**Analysis Info**

Analysis Name D:\Data\Kolotyrkina\2023\Malahova\1130030.d  
Method tune\_low.m  
Sample Name /YUVA MaVi-176f1  
Comment C29H42N2O4 mH 483.3217 calibrant added CH3OH

Acquisition Date 30.11.2023 15:59:01  
Operator BDAL@DE  
Instrument / Ser# micrOTOF 10248

**Acquisition Parameter**

|             |            |                      |          |                  |           |
|-------------|------------|----------------------|----------|------------------|-----------|
| Source Type | ESI        | Ion Polarity         | Positive | Set Nebulizer    | 0.4 Bar   |
| Focus       | Not active |                      |          | Set Dry Heater   | 180 °C    |
| Scan Begin  | 50 m/z     | Set Capillary        | 4500 V   | Set Dry Gas      | 4.0 l/min |
| Scan End    | 3000 m/z   | Set End Plate Offset | -500 V   | Set Divert Valve | Waste     |

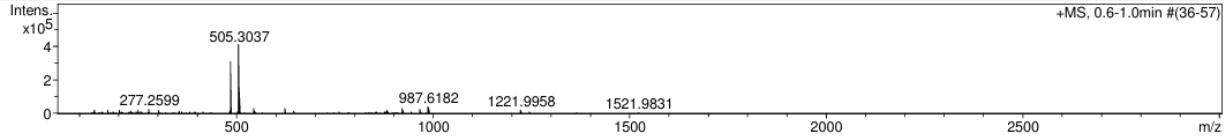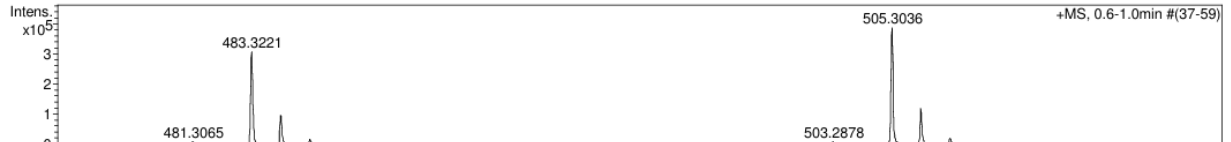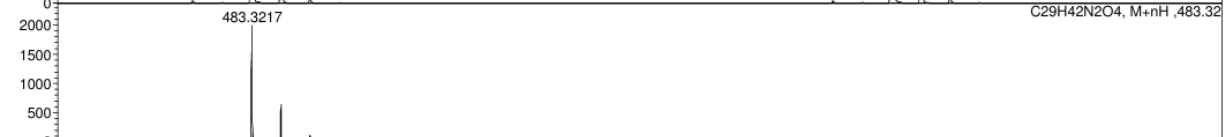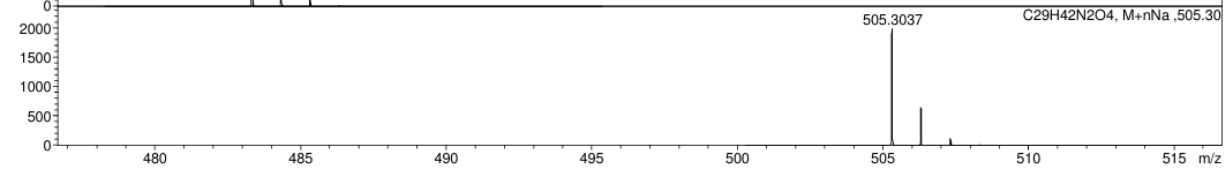

HRMS (ESI/Q-TOF) of 3-acetate 20-(5`-diethylamineisoxazole)-pregna-5-en-3β-ol-20-one (**7d**)

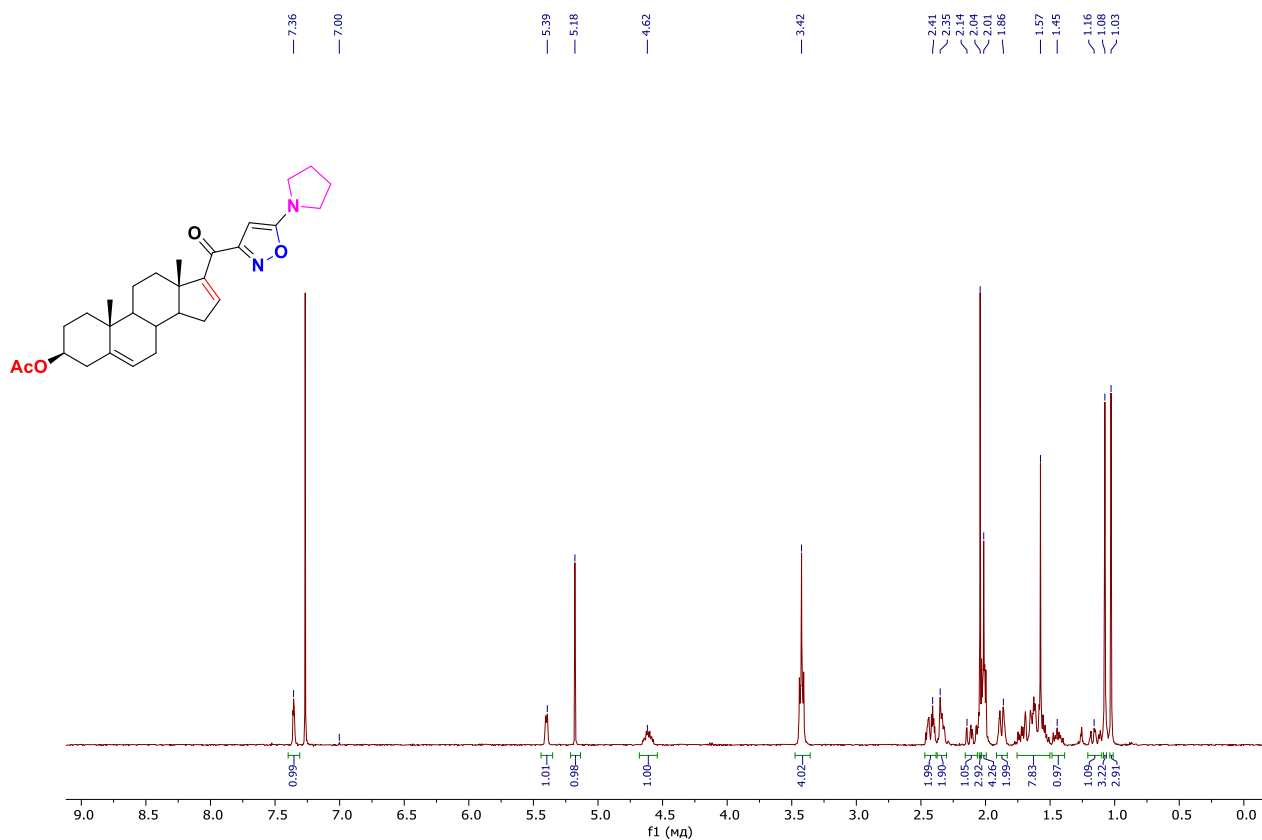

<sup>1</sup>H NMR (CDCl<sub>3</sub>, 300 MHz) spectrum of 3-acetate 20-(5-pyrrolidineisoxazole)-pregna-5,16-diene-3β-ol-20-one (7e)

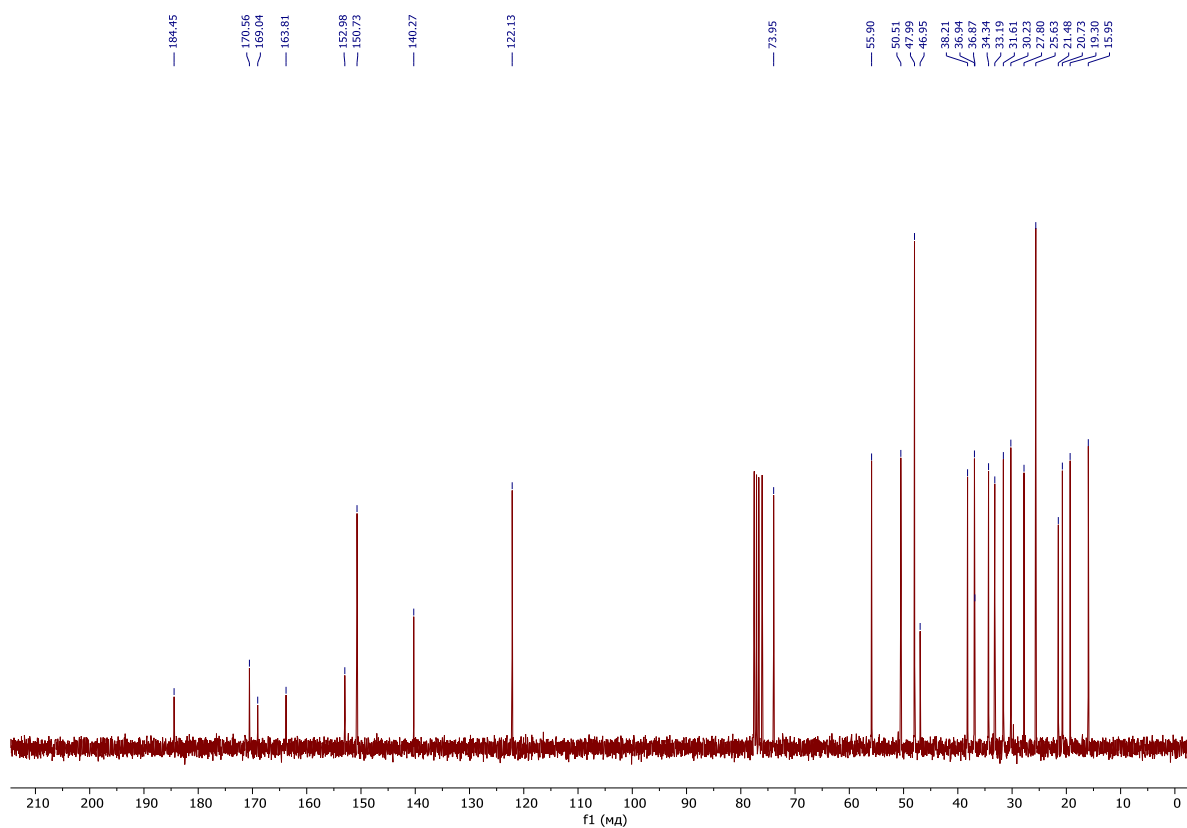

<sup>13</sup>C NMR (CDCl<sub>3</sub>, 75 MHz) spectrum of 3-acetate 20-(5-pyrrolidineisoxazole)-pregna-5,16-diene-3β-ol-20-one (7e)

**Analysis Info**

Analysis Name D:\Data\Kolotyrkina\2023\Malahova\1102005.d  
Method tune\_low.m  
Sample Name /YUVA Vika-006f1  
Comment C29H38N2O4 mH 467.2904 calibrant added CH3OH

Acquisition Date 02.11.2023 13:05:42

Operator BDAL@DE  
Instrument / Ser# micrOTOF 10248

**Acquisition Parameter**

|             |            |                      |          |                  |           |
|-------------|------------|----------------------|----------|------------------|-----------|
| Source Type | ESI        | Ion Polarity         | Positive | Set Nebulizer    | 0.4 Bar   |
| Focus       | Not active |                      |          | Set Dry Heater   | 180 °C    |
| Scan Begin  | 50 m/z     | Set Capillary        | 4500 V   | Set Dry Gas      | 4.0 l/min |
| Scan End    | 3000 m/z   | Set End Plate Offset | -500 V   | Set Divert Valve | Waste     |

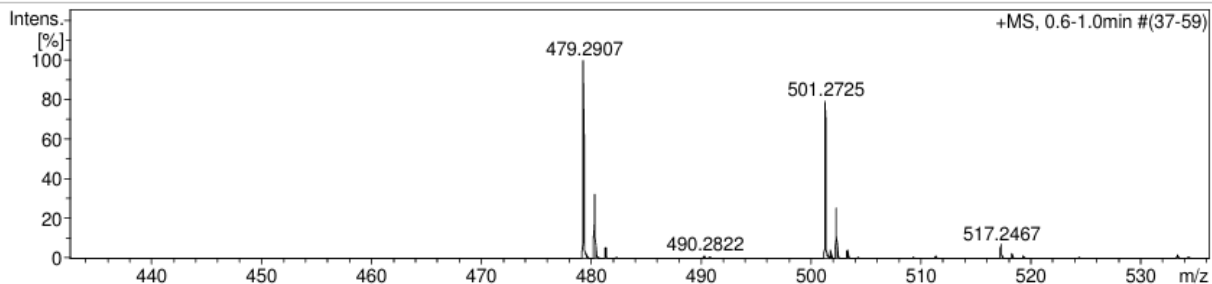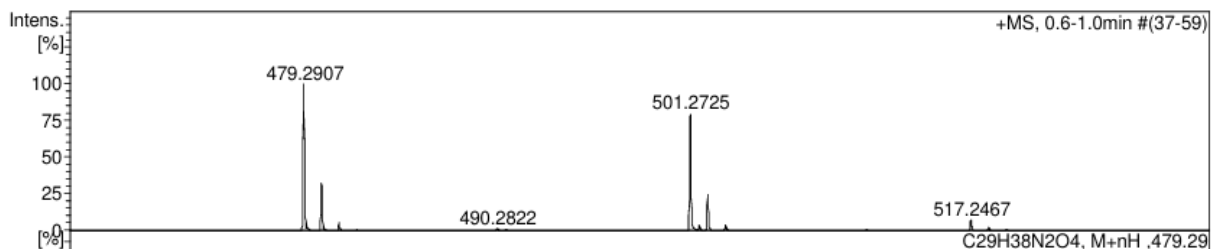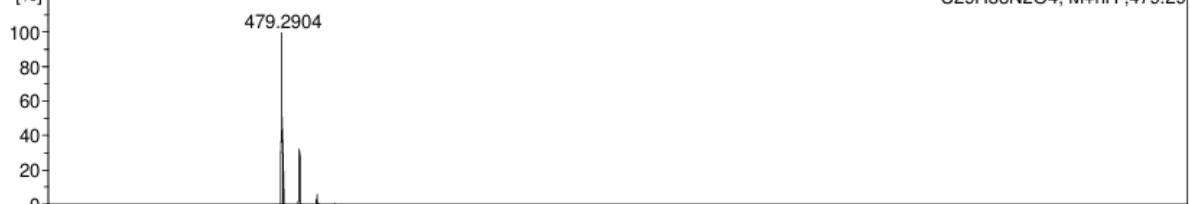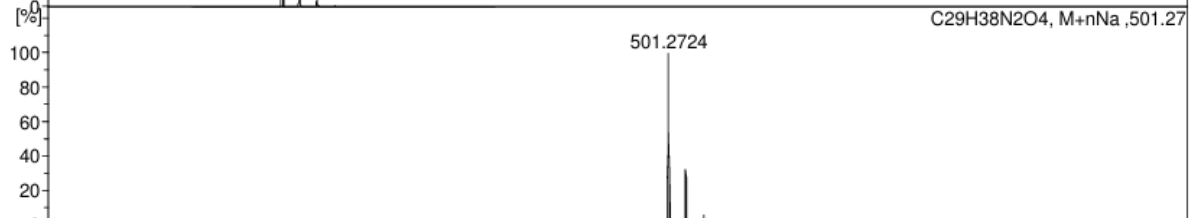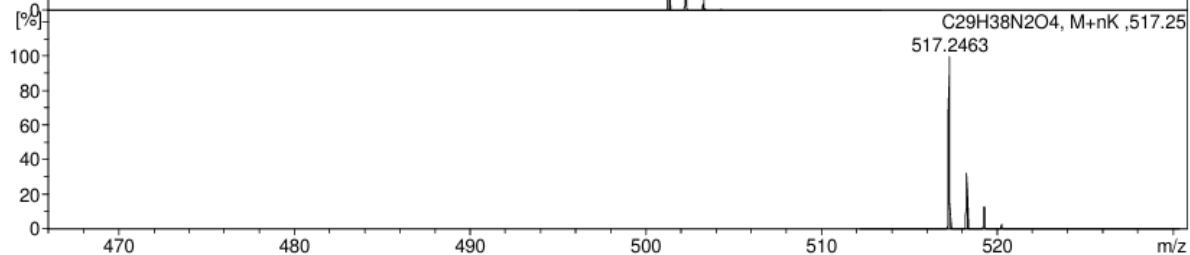

HRMS (ESI/Q-TOF) of 3-acetate 20-(5-pyrrolidineisoxazole)-pregna-5,16-diene-3 $\beta$ -ol-20-one (**7e**)

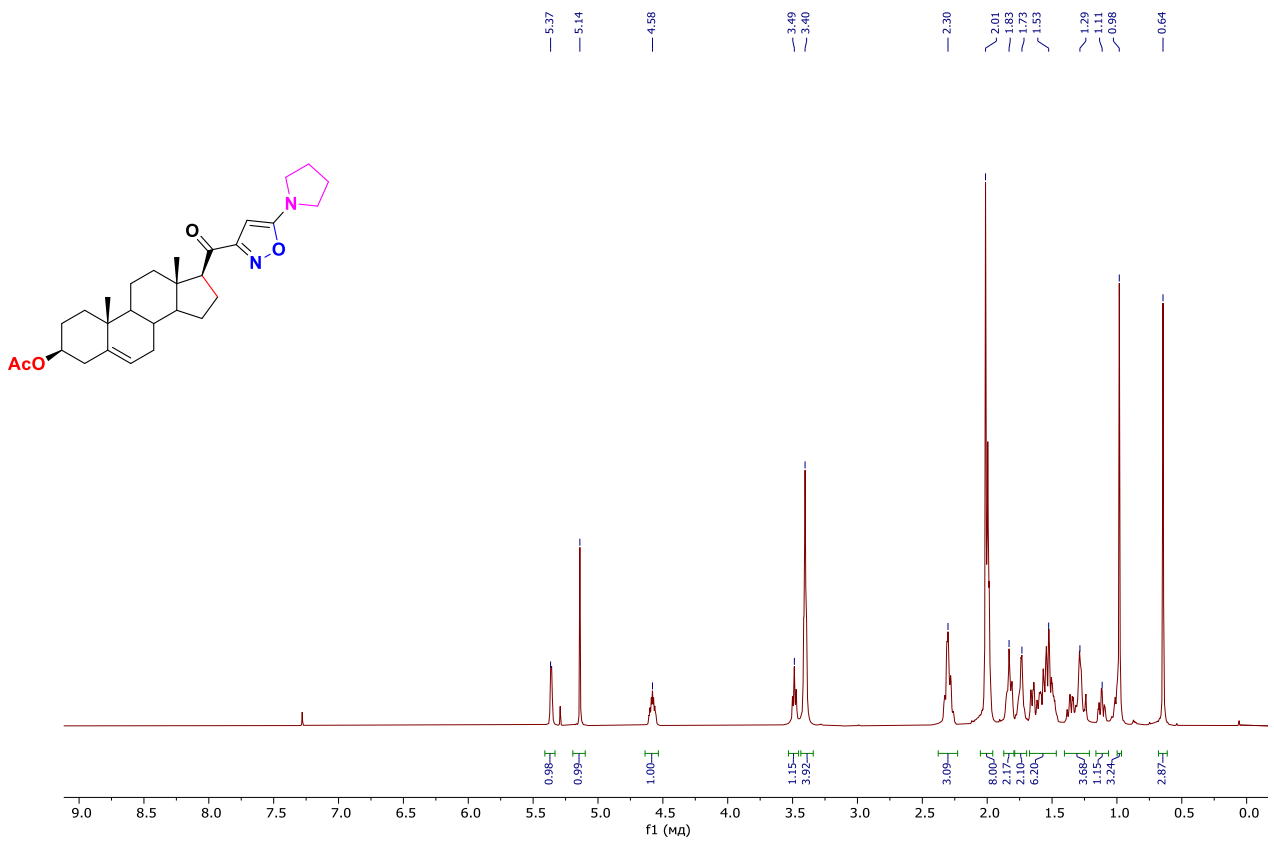

$^1\text{H}$  NMR ( $\text{CDCl}_3$ , 600 MHz) spectrum of 3-acetate 20-(5'-pirrolidineisoxazole)-pregna-5-en-3 $\beta$ -ol-20-one (7f)

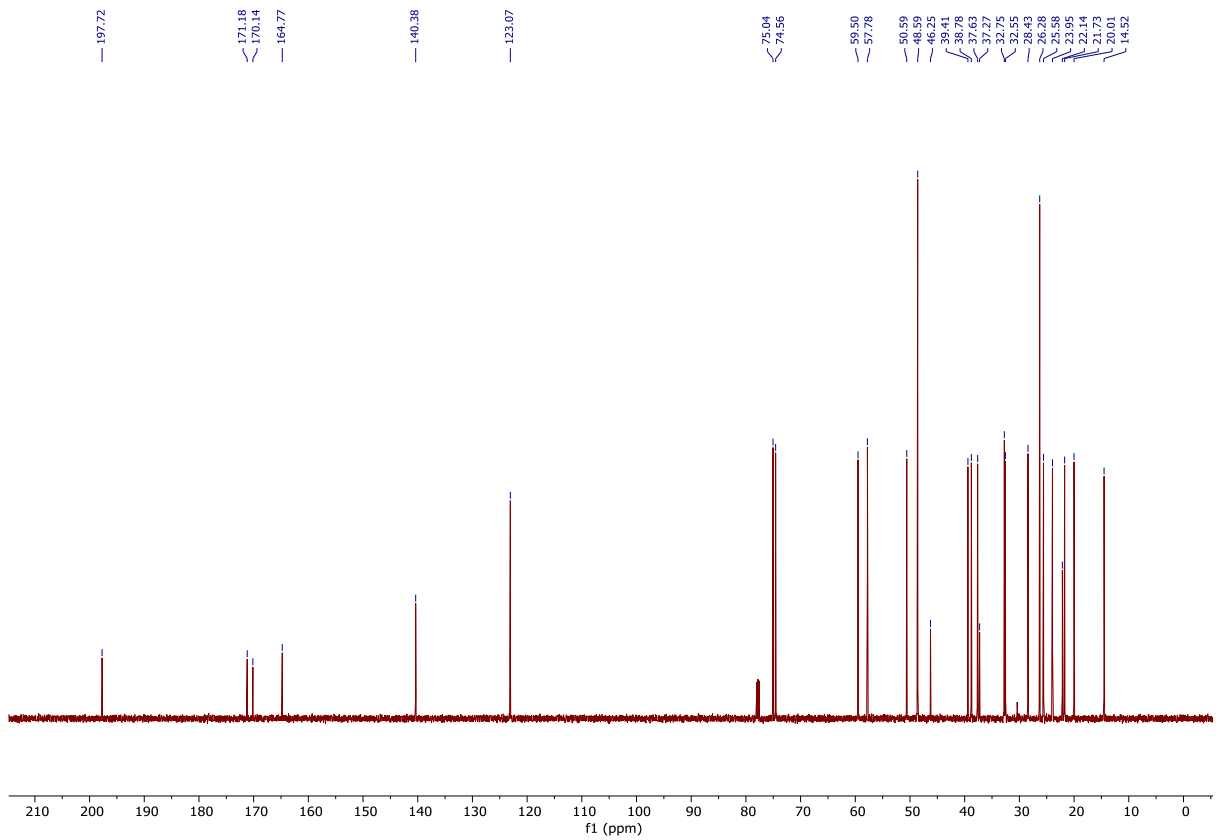

$^{13}\text{C}$  NMR ( $\text{CDCl}_3$ , 151 MHz) spectrum of 3-acetate 20-(5'-pirrolidineisoxazole)-pregna-5-en-3 $\beta$ -ol-20-one (7f)

**Analysis Info**

Analysis Name D:\Data\Kolotyrkina\2023\Malahova\1130029.d  
Method tune\_low.m  
Sample Name /YUVA MaVi-178f1  
Comment C29H40N2O4 mH 481.3060 calibrant added CH3OH

Acquisition Date 30.11.2023 15:52:38  
Operator BDAL@DE  
Instrument / Ser# micrOTOF 10248

**Acquisition Parameter**

|             |            |                      |          |                  |           |
|-------------|------------|----------------------|----------|------------------|-----------|
| Source Type | ESI        | Ion Polarity         | Positive | Set Nebulizer    | 0.4 Bar   |
| Focus       | Not active |                      |          | Set Dry Heater   | 180 °C    |
| Scan Begin  | 50 m/z     | Set Capillary        | 4500 V   | Set Dry Gas      | 4.0 l/min |
| Scan End    | 3000 m/z   | Set End Plate Offset | -500 V   | Set Divert Valve | Waste     |

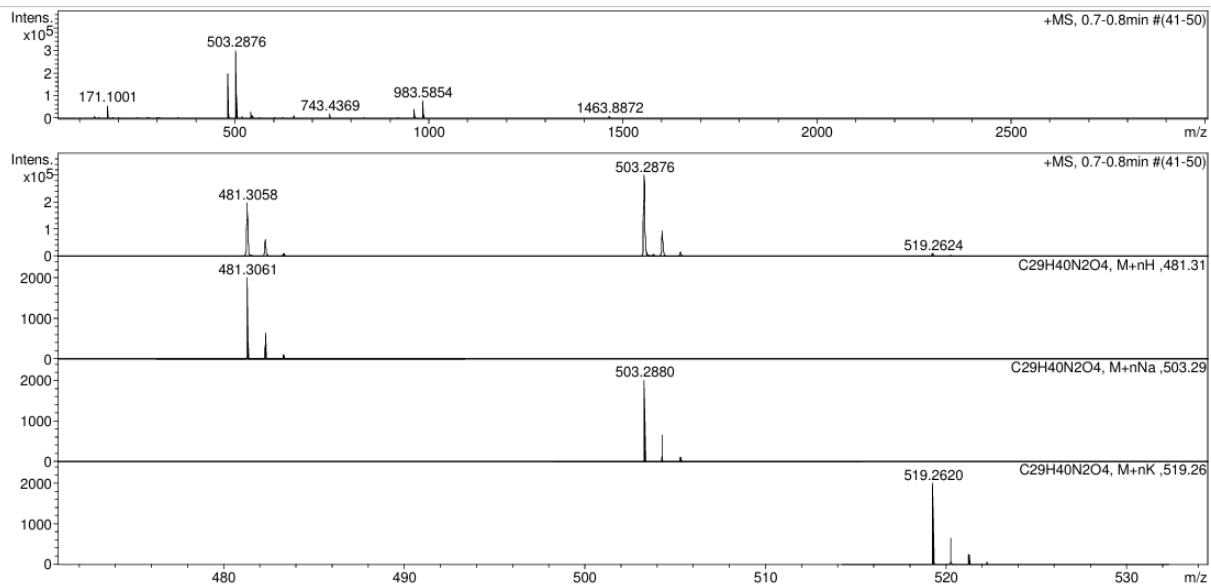

HRMS (ESI/Q-TOF) of 3-acetate 20-(5'-pirrolidineisoxazole)-pregna-5-en-3 $\beta$ -ol-20-one (**7f**)

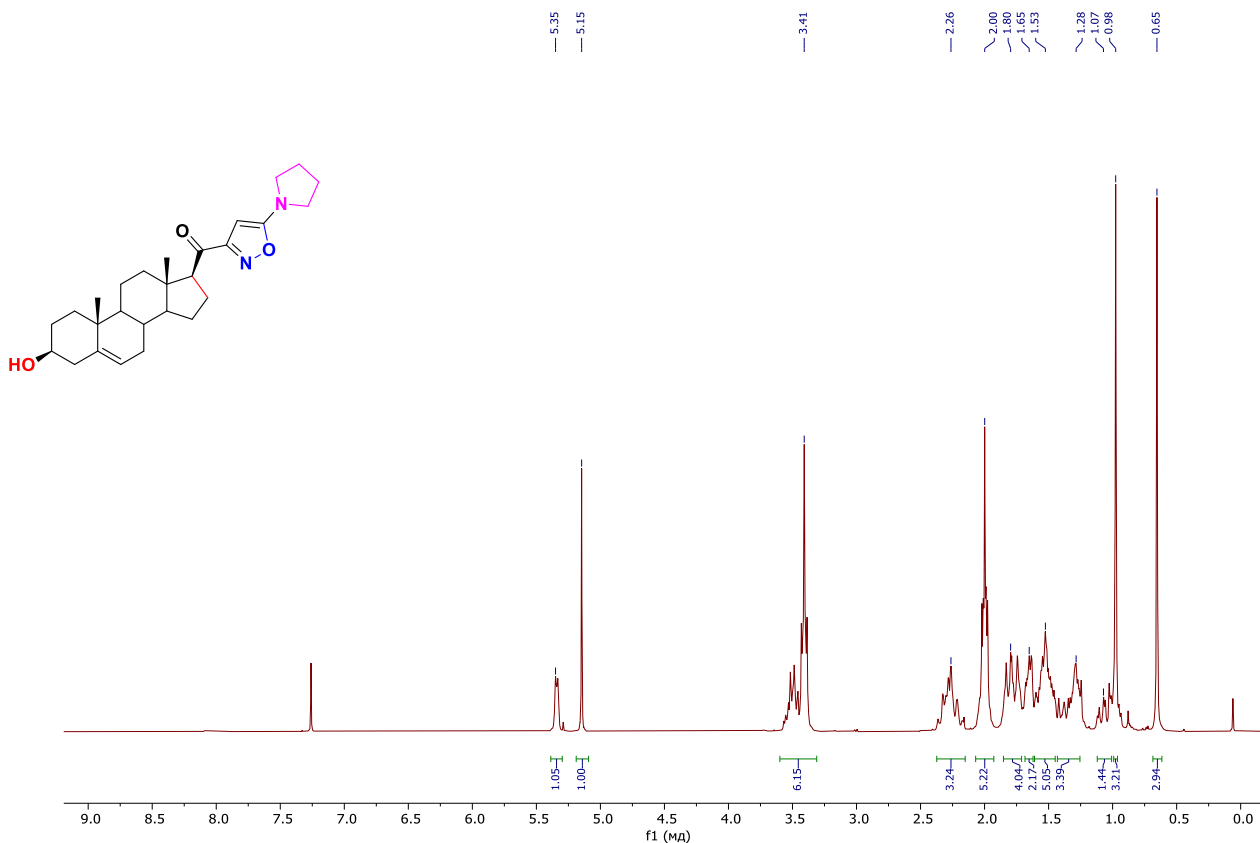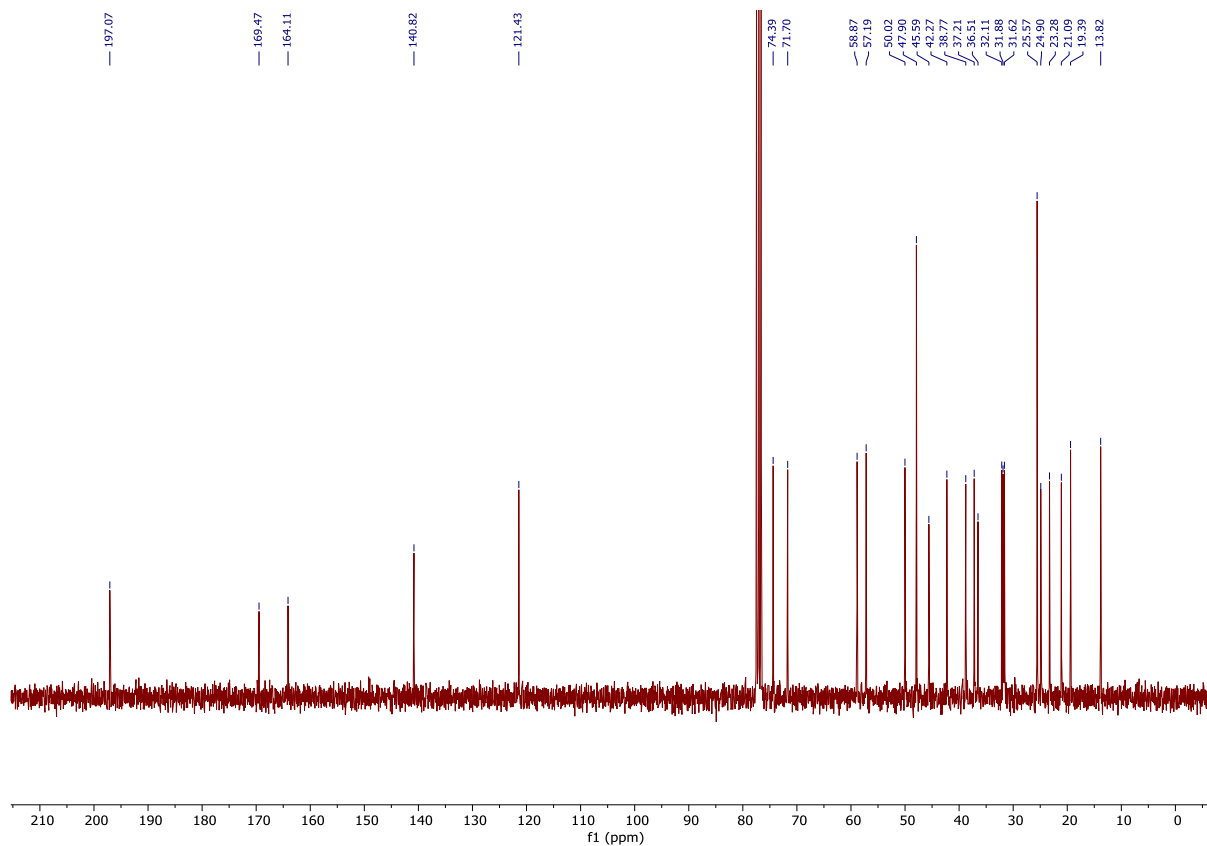

**Analysis Info**

Analysis Name D:\Data\Kolotyrkina\2024\Malahova\0320041.d  
Method tune\_low.m  
Sample Name /YUVA MaVi-193f1  
Comment C27H38N2O3 mH439.2936 calibrant added CH3OH

Acquisition Date 20.03.2024 17:20:44

Operator BDAL@DE  
Instrument / Ser# microTOF 10248

**Acquisition Parameter**

|             |            |                      |          |                  |           |
|-------------|------------|----------------------|----------|------------------|-----------|
| Source Type | ESI        | Ion Polarity         | Positive | Set Nebulizer    | 0.4 Bar   |
| Focus       | Not active |                      |          | Set Dry Heater   | 180 °C    |
| Scan Begin  | 50 m/z     | Set Capillary        | 4500 V   | Set Dry Gas      | 4.0 l/min |
| Scan End    | 3000 m/z   | Set End Plate Offset | -500 V   | Set Divert Valve | Waste     |

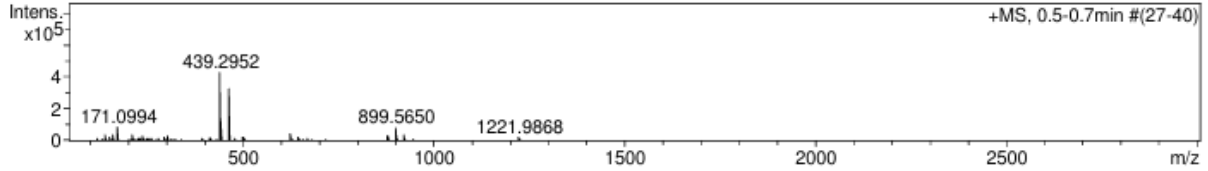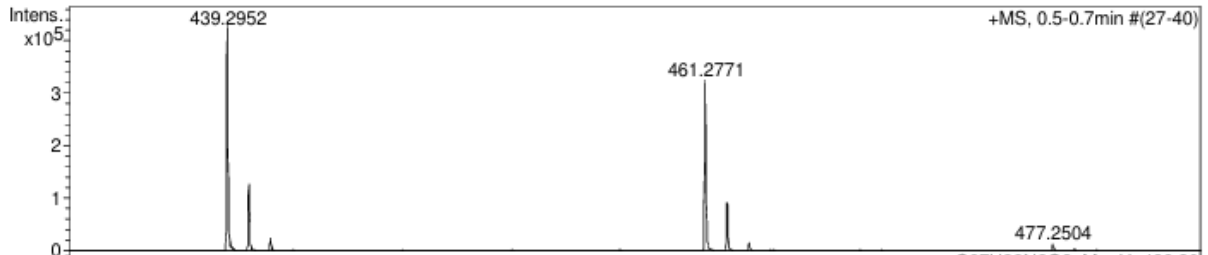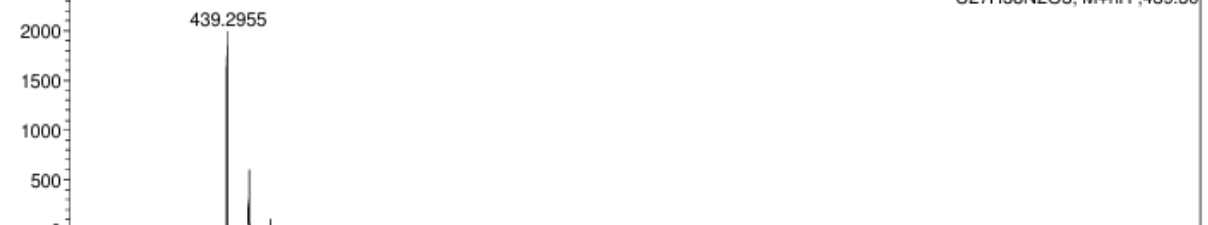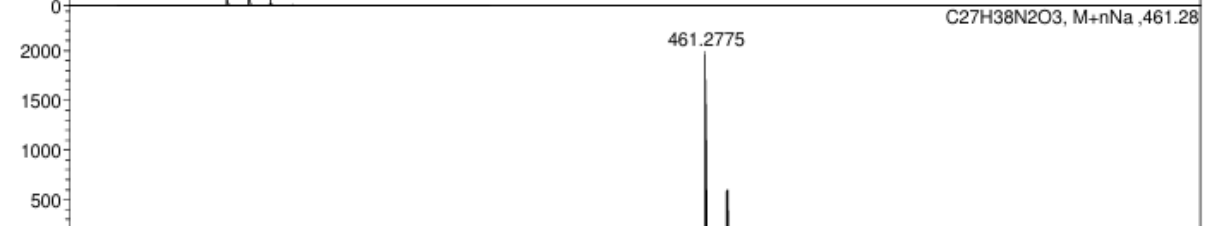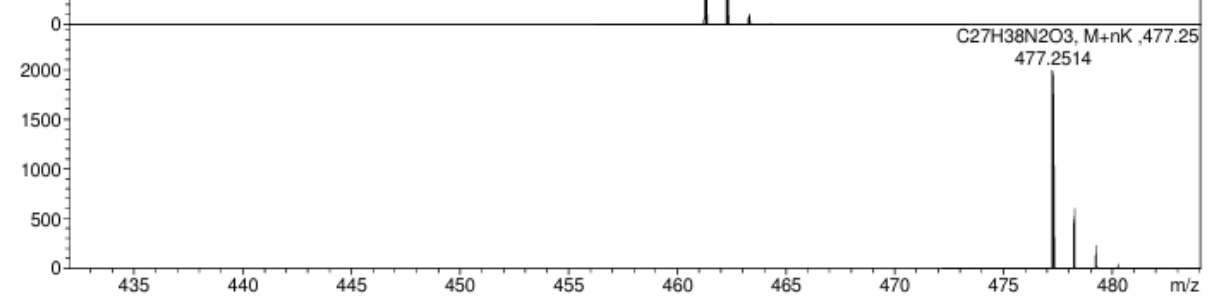

HRMS (ESI/Q-TOF) of 20-[3`-(5``-pyrrolidine)isoxazole]-pregn-5-en-3β-ol-20-one (**7g**)

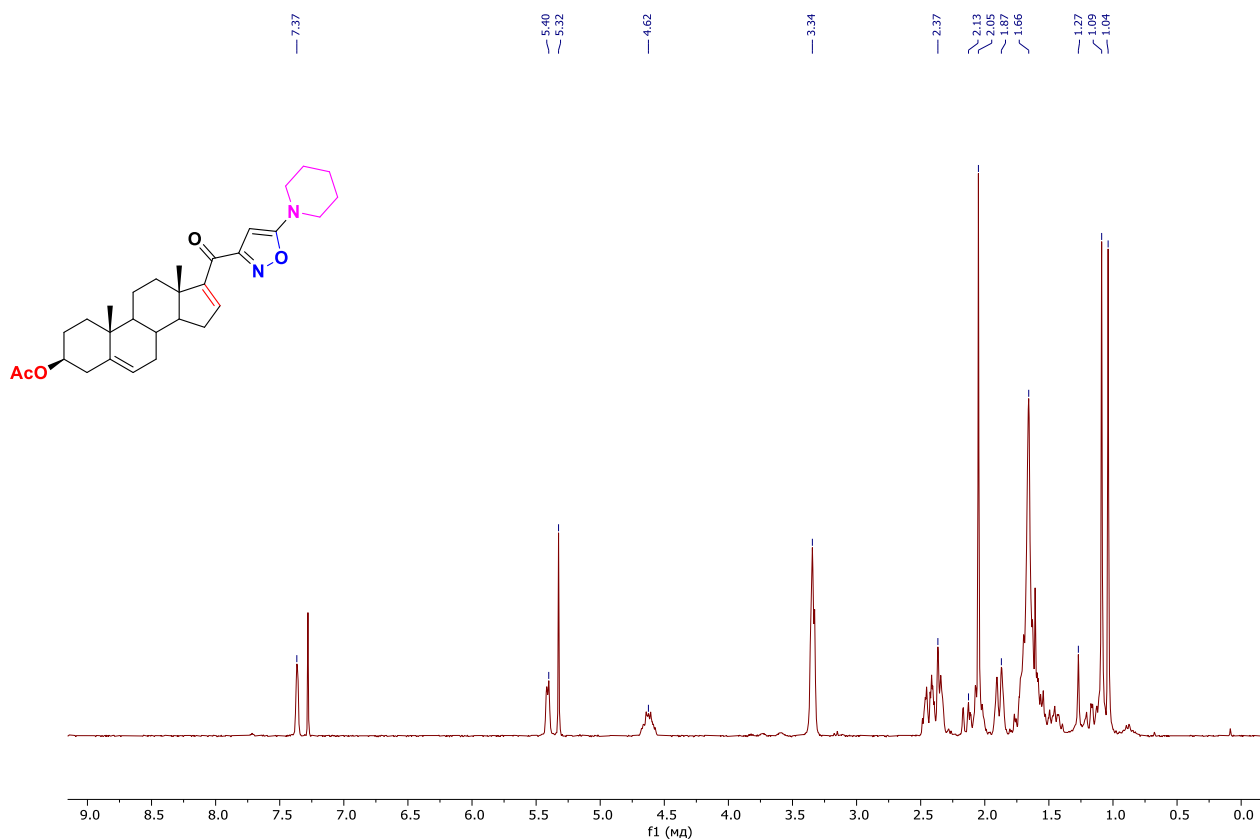

<sup>1</sup>H NMR (CDCl<sub>3</sub>, 300 MHz) spectrum of 3-acetate 20-(5'-piperidine isoxazole)-pregna-5,16-diene-3β-ol-20-one (7h)

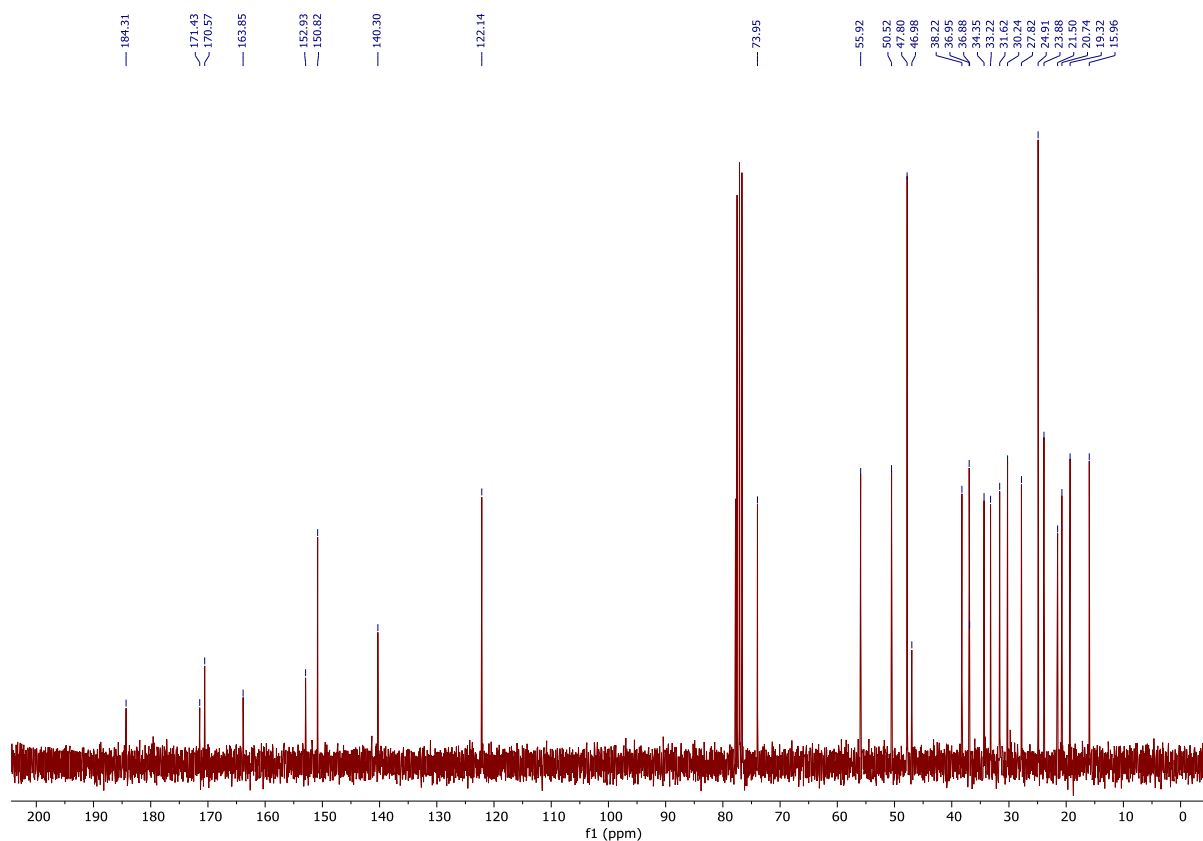

<sup>13</sup>C NMR (CDCl<sub>3</sub>, 75 MHz) spectrum of 3-acetate 20-(5'-piperidine isoxazole)-pregna-5,16-diene-3β-ol-20-one (7h)

**Analysis Info**

Analysis Name D:\Data\Kolotyrkina\2023\Malahova\1130031.d  
Method tune\_low.m  
Sample Name /YUVA vika-009f1  
Comment C30H40N2O4 mH 493.3060 calibrant added CH3OH

Acquisition Date 30.11.2023 16:09:01  
Operator BDAL@DE  
Instrument / Ser# micrOTOF 10248

**Acquisition Parameter**

|             |            |                      |          |                  |           |
|-------------|------------|----------------------|----------|------------------|-----------|
| Source Type | ESI        | Ion Polarity         | Positive | Set Nebulizer    | 0.4 Bar   |
| Focus       | Not active |                      |          | Set Dry Heater   | 180 °C    |
| Scan Begin  | 50 m/z     | Set Capillary        | 4500 V   | Set Dry Gas      | 4.0 l/min |
| Scan End    | 3000 m/z   | Set End Plate Offset | -500 V   | Set Divert Valve | Waste     |

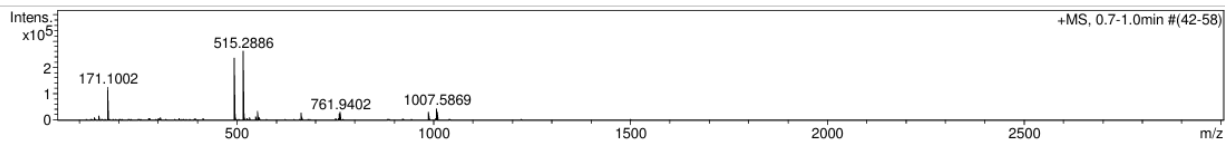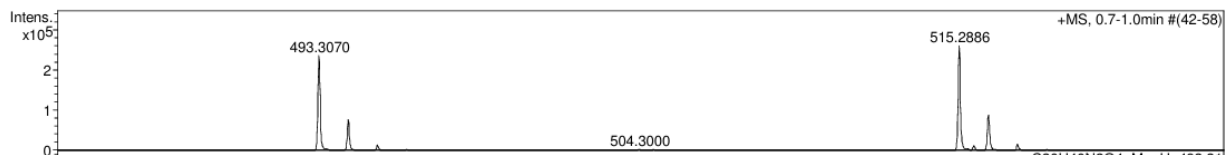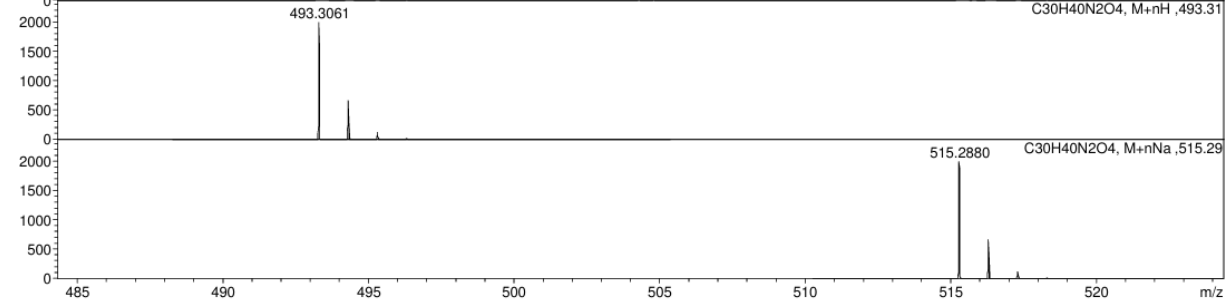

HRMS (ESI/Q-TOF) of 3-acetate 20-(5'-piperidine isoxazole)-pregna-5,16-diene-3 $\beta$ -ol-20-one (**7h**)

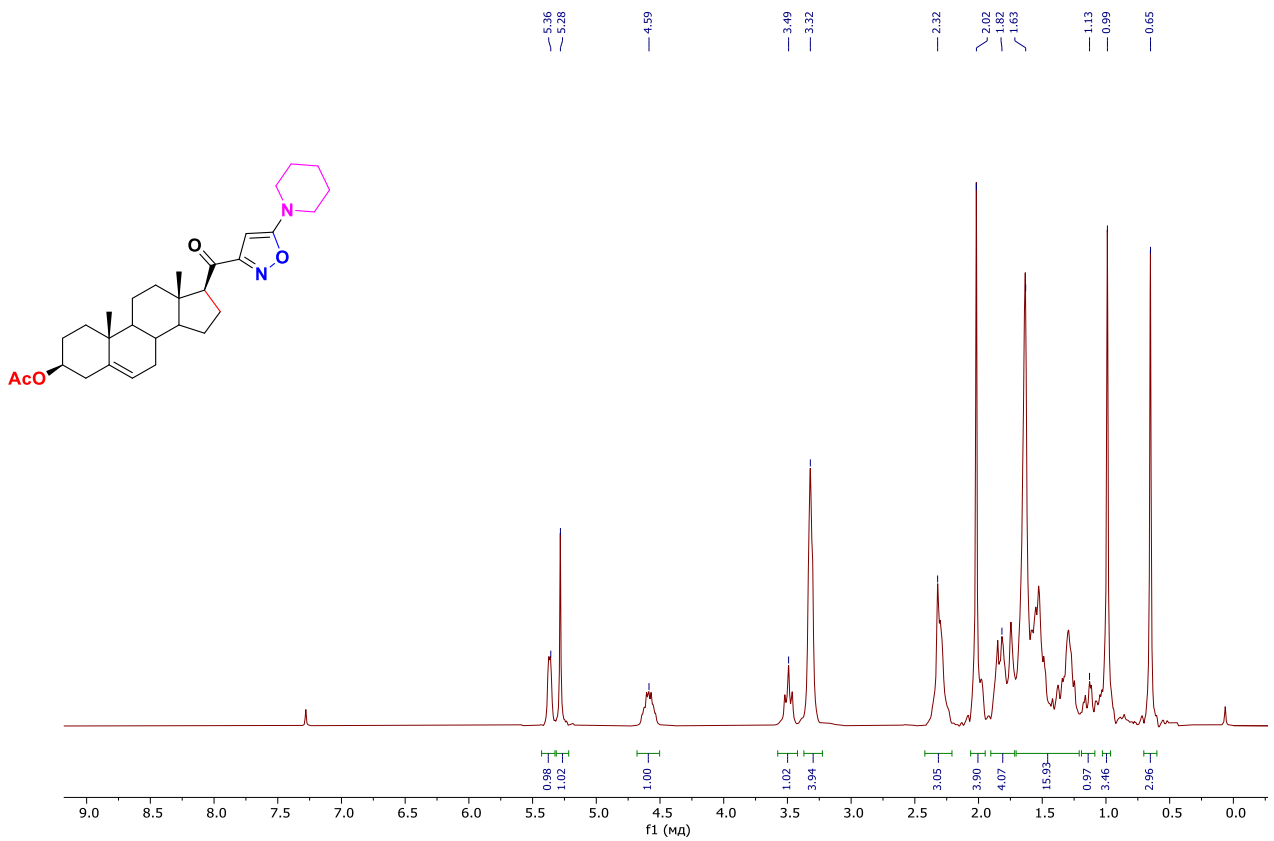

<sup>1</sup>H NMR (CDCl<sub>3</sub>, 300 MHz) spectrum of 3-acetate 20-[5'-piperidine isoxazole]-pregna-5-en-3β-ol-20-one (7i)

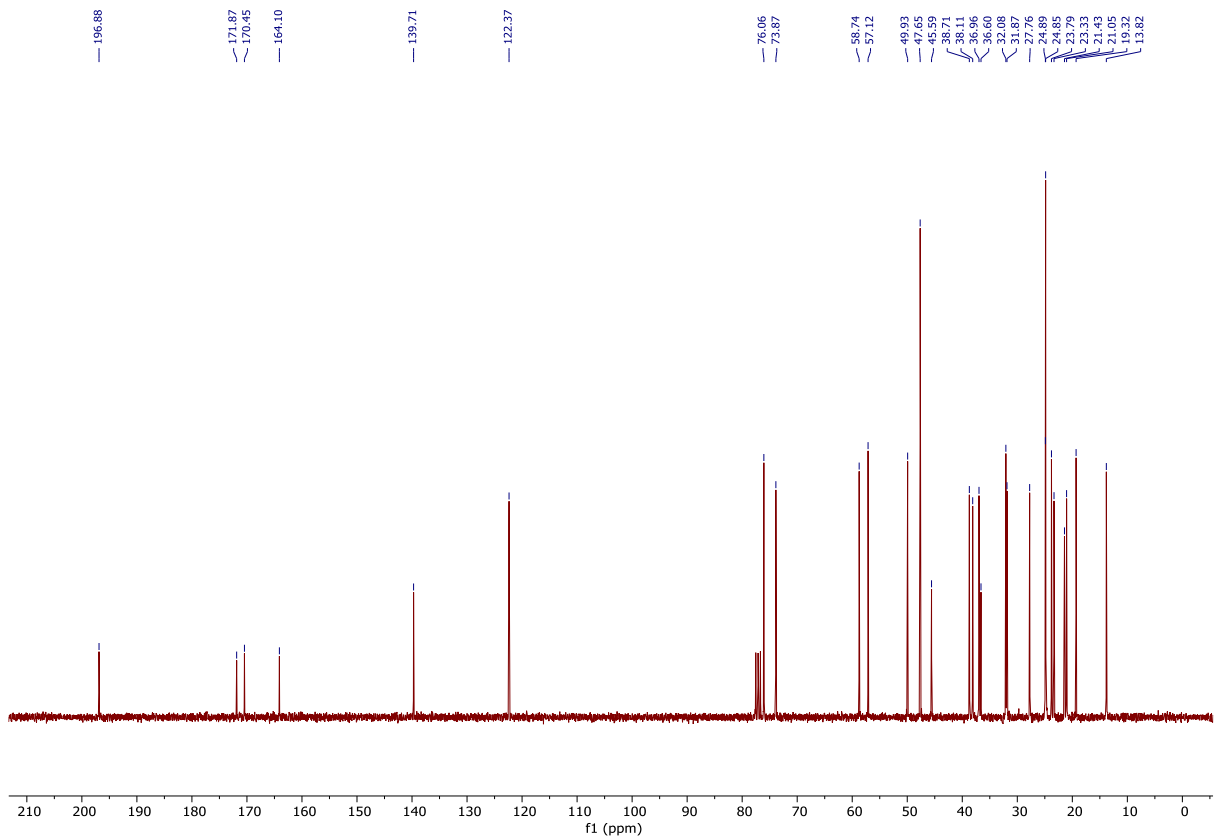

<sup>13</sup>C NMR (CDCl<sub>3</sub>, 75 MHz) spectrum of 3-acetate 20-[5'-piperidine isoxazole]-pregna-5-en-3β-ol-20-one (7i)

**Analysis Info**

Analysis Name D:\Data\Kolotyrkina\2023\Malahova\1214014.d  
Method tune\_low.m  
Sample Name /YUVA MaVi-182f1  
Comment C30H42N2O4 mH495.3217 clb added CH3OH

Acquisition Date 14.12.2023 14:20:39

Operator BDAL@DE  
Instrument / Ser# micrOTOF 10248

**Acquisition Parameter**

|             |            |                      |          |                  |           |
|-------------|------------|----------------------|----------|------------------|-----------|
| Source Type | ESI        | Ion Polarity         | Positive | Set Nebulizer    | 0.4 Bar   |
| Focus       | Not active |                      |          | Set Dry Heater   | 180 °C    |
| Scan Begin  | 50 m/z     | Set Capillary        | 4500 V   | Set Dry Gas      | 4.0 l/min |
| Scan End    | 3000 m/z   | Set End Plate Offset | -500 V   | Set Divert Valve | Waste     |

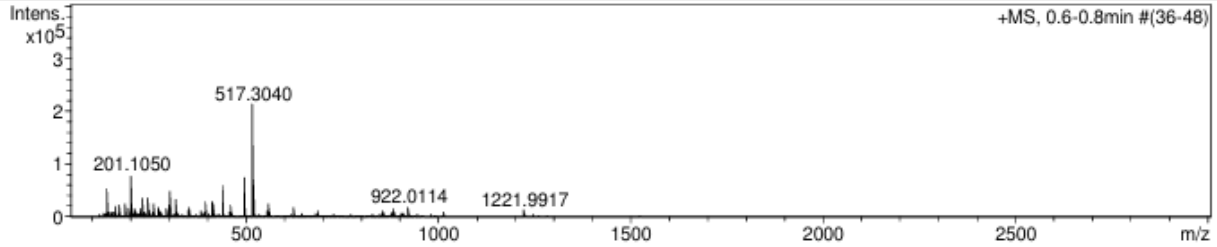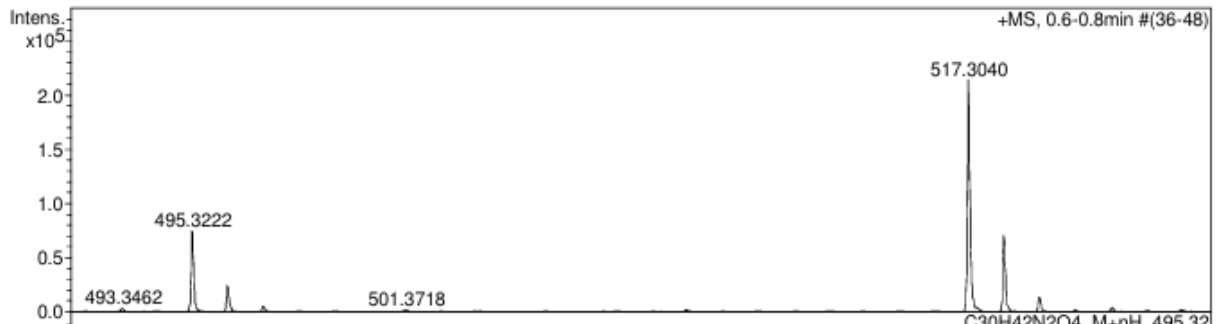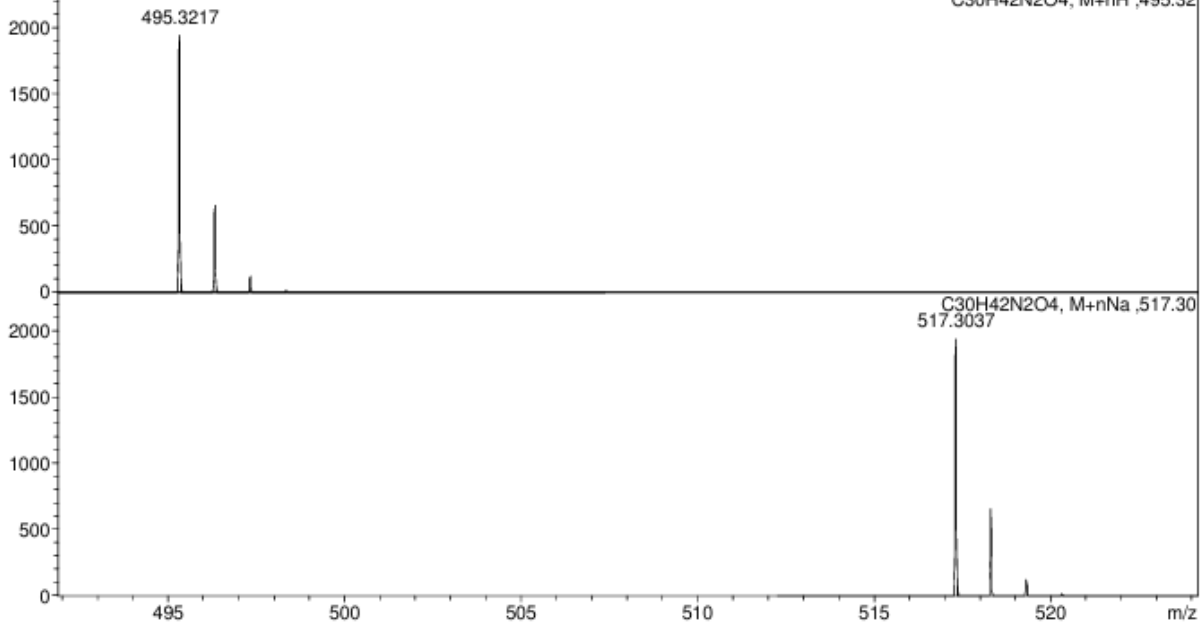

HRMS (ESI/Q-TOF) of 3-acetate 20-[5`-piperidine isoxazole]-pregna-5-en-3 $\beta$ -ol-20-one (7i)

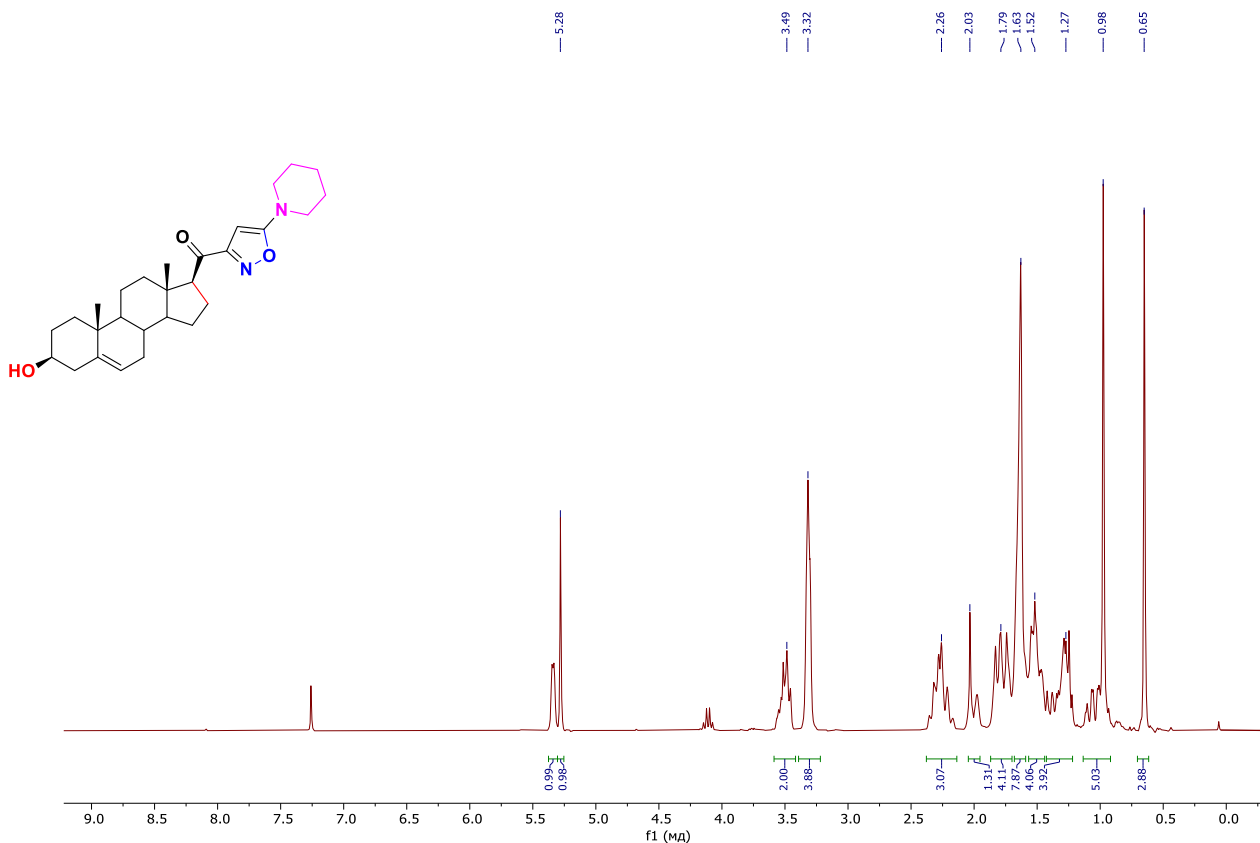

<sup>1</sup>H NMR (CDCl<sub>3</sub>, 300 MHz) spectrum of 20-[3'-(5''-piperidine)isoxazole]-pregn-5-en-3β-ol-20-one (7j)

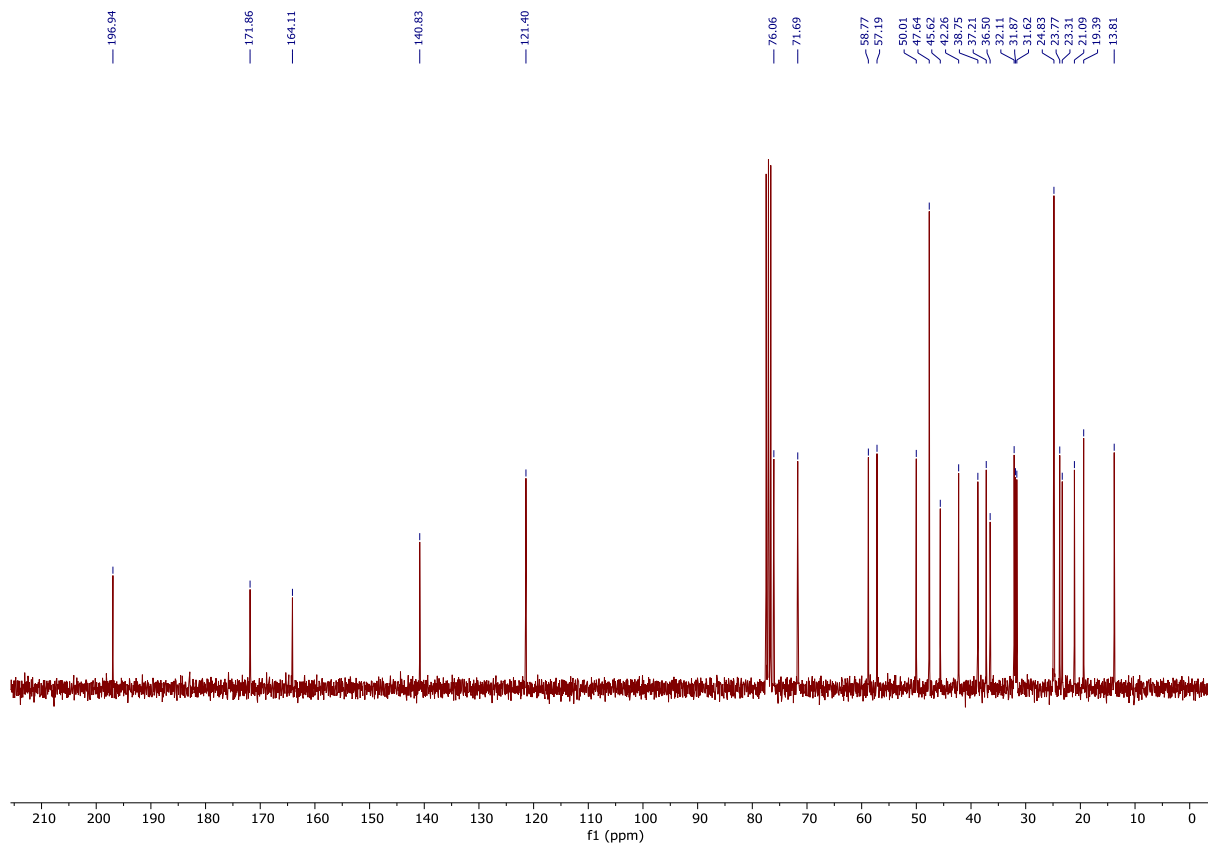

<sup>13</sup>C NMR (CDCl<sub>3</sub>, 75 MHz) spectrum of 20-[3'-(5''-piperidine)isoxazole]-pregn-5-en-3β-ol-20-one (7j)

**Analysis Info**

Analysis Name D:\Data\Kolotyrkina\2024\Malahova\0403039.d  
Method tune\_low.m  
Sample Name /YUVA MaVi-196f1  
Comment C28H40N2O3 mH453.3111 calibrant added CH3OH

Acquisition Date 03.04.2024 19:10:19

Operator BDAL@DE  
Instrument / Ser# micrOTOF 10248

**Acquisition Parameter**

|             |            |                      |          |                  |           |
|-------------|------------|----------------------|----------|------------------|-----------|
| Source Type | ESI        | Ion Polarity         | Positive | Set Nebulizer    | 0.4 Bar   |
| Focus       | Not active |                      |          | Set Dry Heater   | 180 °C    |
| Scan Begin  | 50 m/z     | Set Capillary        | 4500 V   | Set Dry Gas      | 4.0 l/min |
| Scan End    | 3000 m/z   | Set End Plate Offset | -500 V   | Set Divert Valve | Waste     |

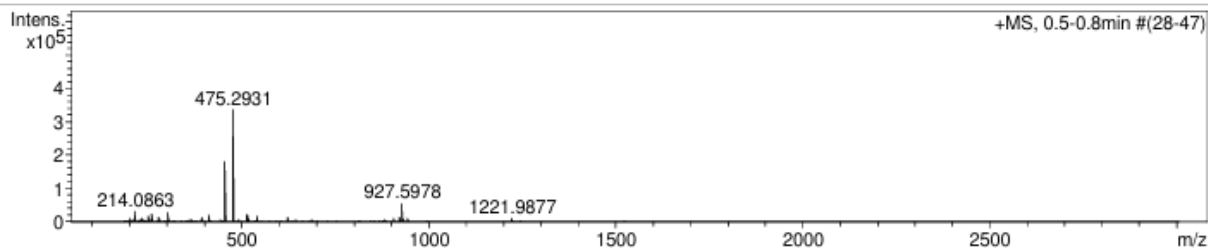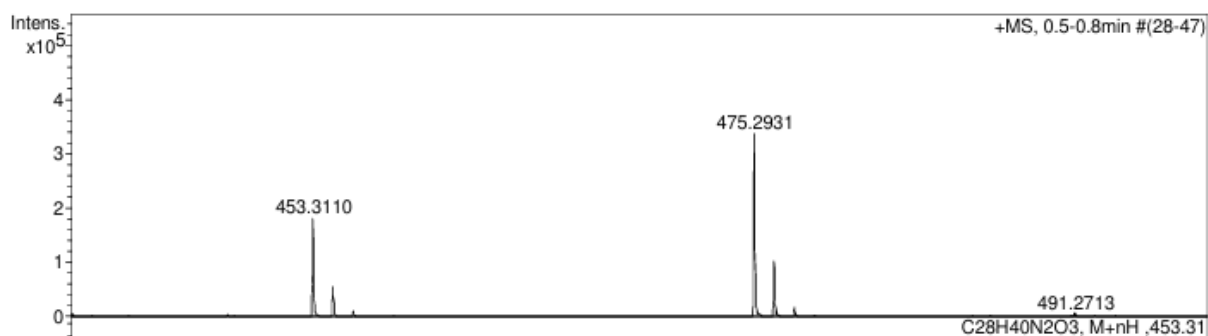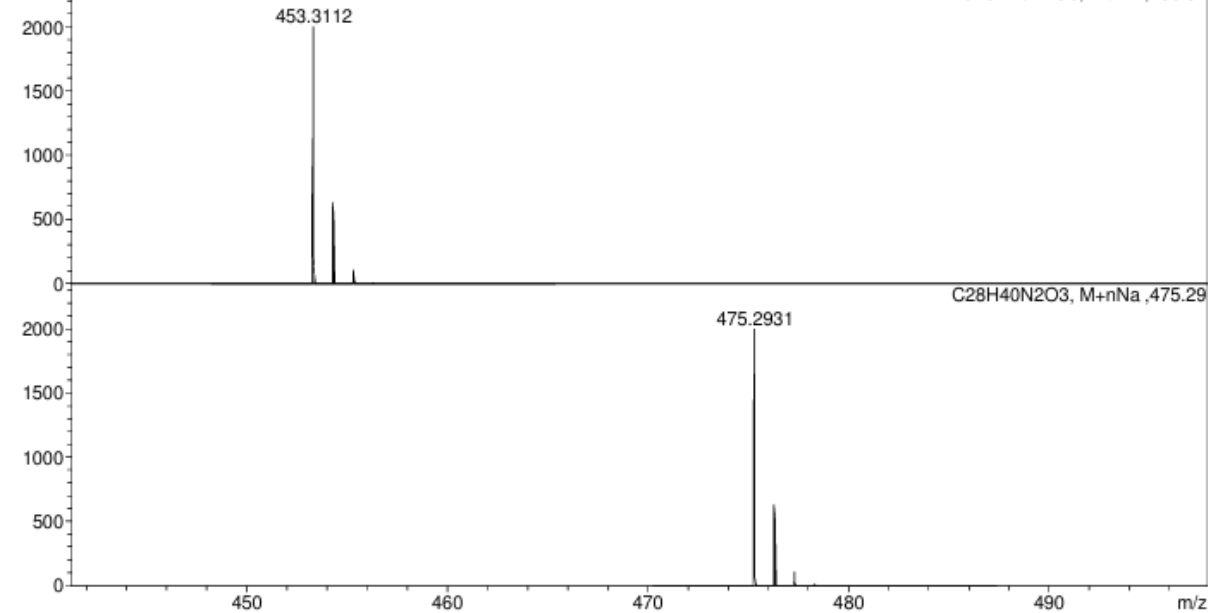

HRMS (ESI/Q-TOF) of 20-[3'-(5''-piperidine)isoxazole]-pregn-5-en-3β-ol-20-one (7j)

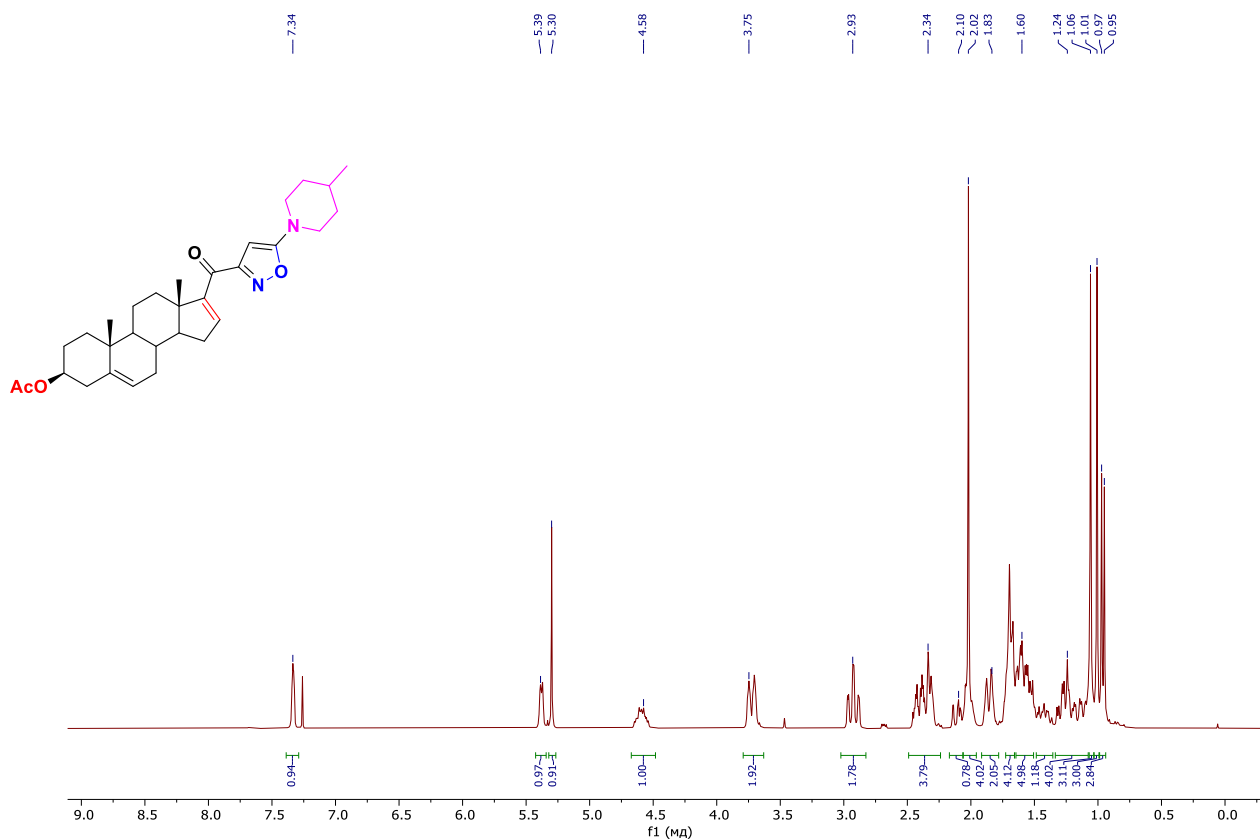

<sup>1</sup>H NMR (CDCl<sub>3</sub>, 300 MHz) spectrum of 3-acetate 20-[5'-(4''-methylpiperidine)isoxazole]-pregna-5,16-diene-3β-ol-20-one (7k)

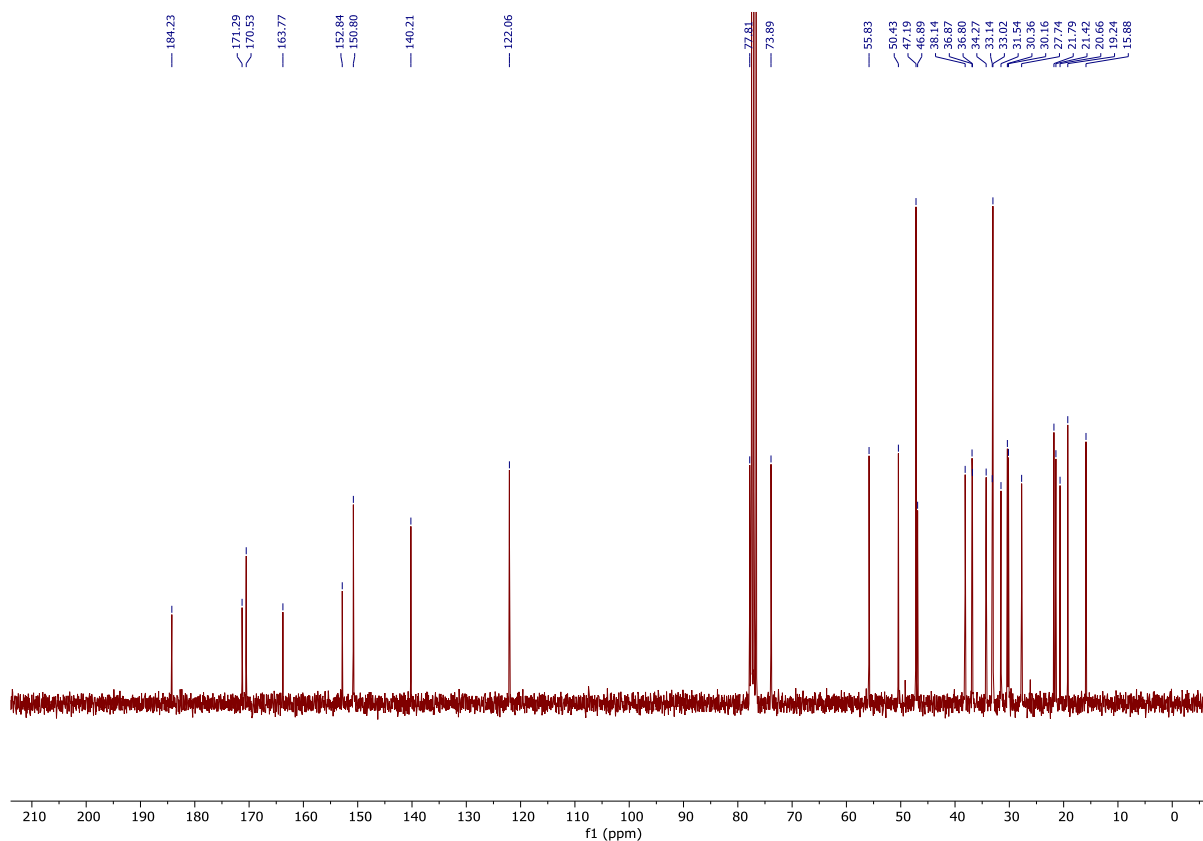

<sup>13</sup>C NMR (CDCl<sub>3</sub>, 75 MHz) spectrum of 3-acetate 20-[5'-(4''-methylpiperidine)isoxazole]-pregna-5,16-diene-3β-ol-20-one (7k)

**Analysis Info**

Analysis Name D:\Data\Kolotyrykina\2024\Volkova\0208043.d  
Method tune\_low.m  
Sample Name /YUVA vika-22f2  
Comment C31H42N2O4 mH507.3217 calibrant added CH3OH

Acquisition Date 08.02.2024 18:08:42

Operator BDAL@DE  
Instrument / Ser# micrOTOF 10248

**Acquisition Parameter**

|             |            |                      |          |                  |           |
|-------------|------------|----------------------|----------|------------------|-----------|
| Source Type | ESI        | Ion Polarity         | Positive | Set Nebulizer    | 0.4 Bar   |
| Focus       | Not active |                      |          | Set Dry Heater   | 180 °C    |
| Scan Begin  | 50 m/z     | Set Capillary        | 4500 V   | Set Dry Gas      | 4.0 l/min |
| Scan End    | 3000 m/z   | Set End Plate Offset | -500 V   | Set Divert Valve | Waste     |

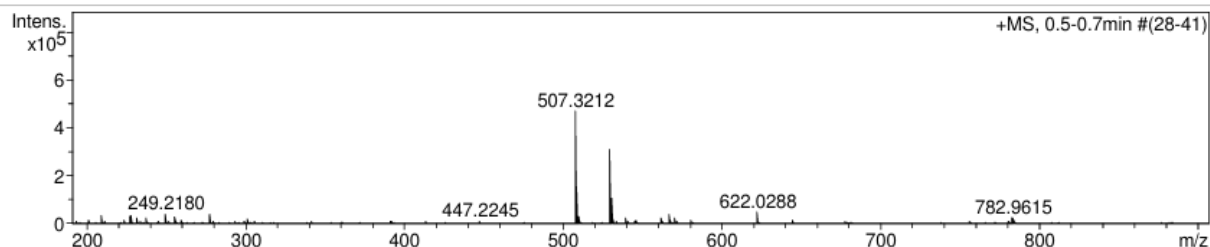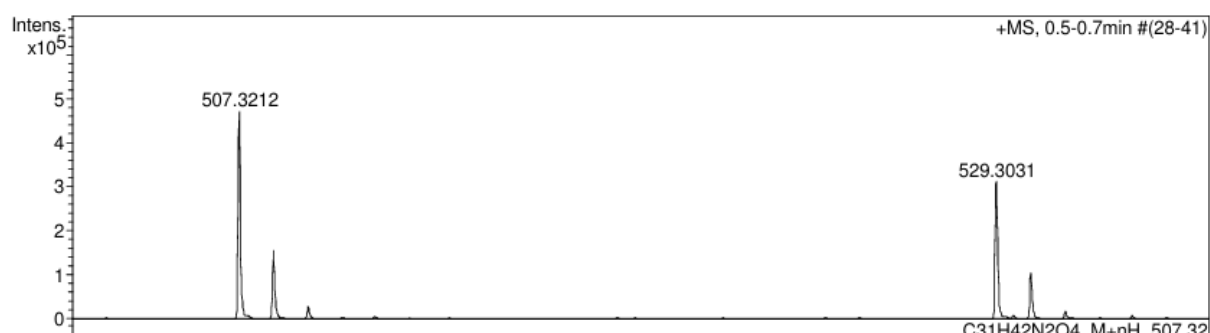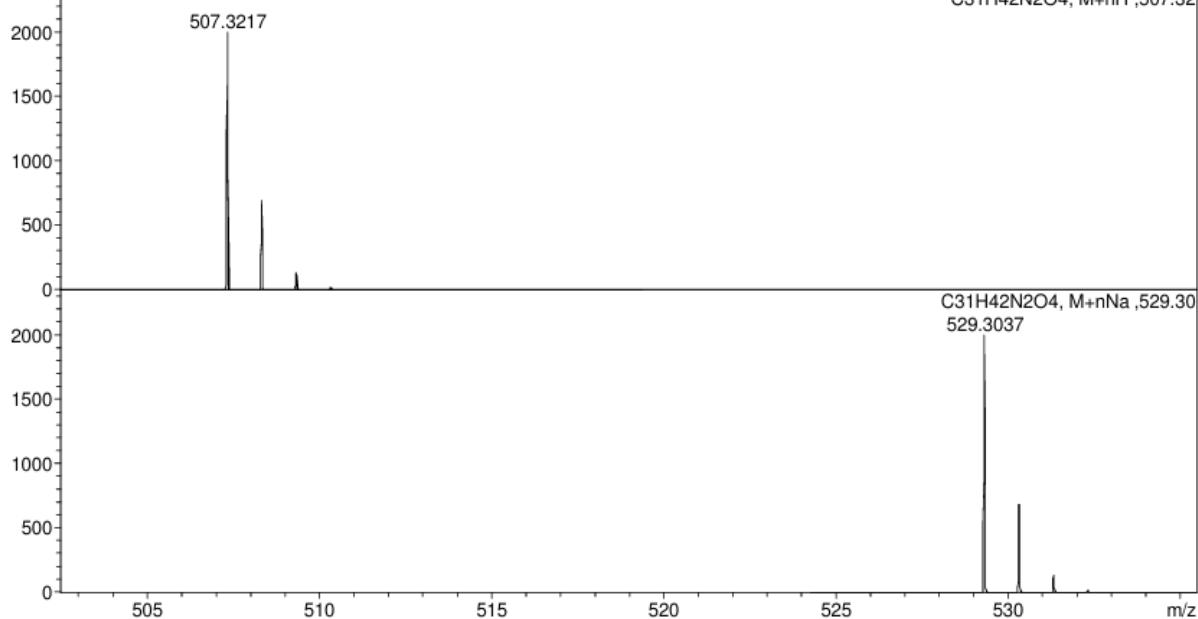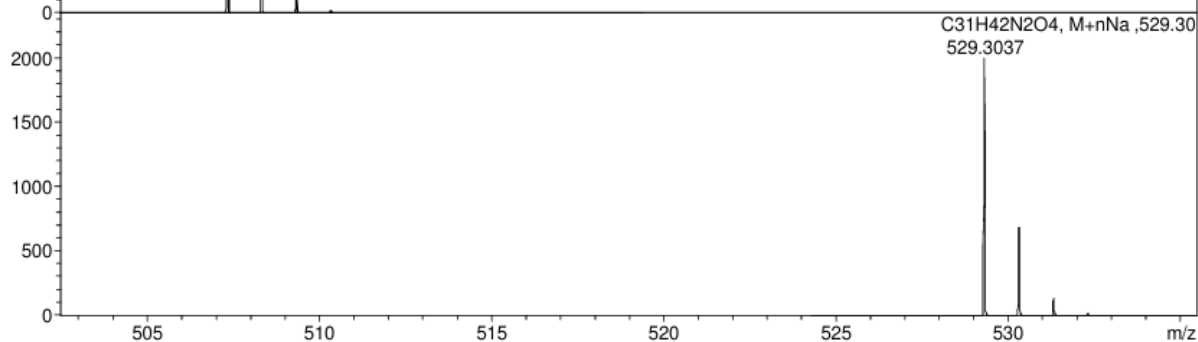

HRMS (ESI/Q-TOF) of 3-acetate 20-[5`-(4``-methylpiperidine)isoxazole]-pregna-5,16-diene-3β-ol-20-one (**7k**)

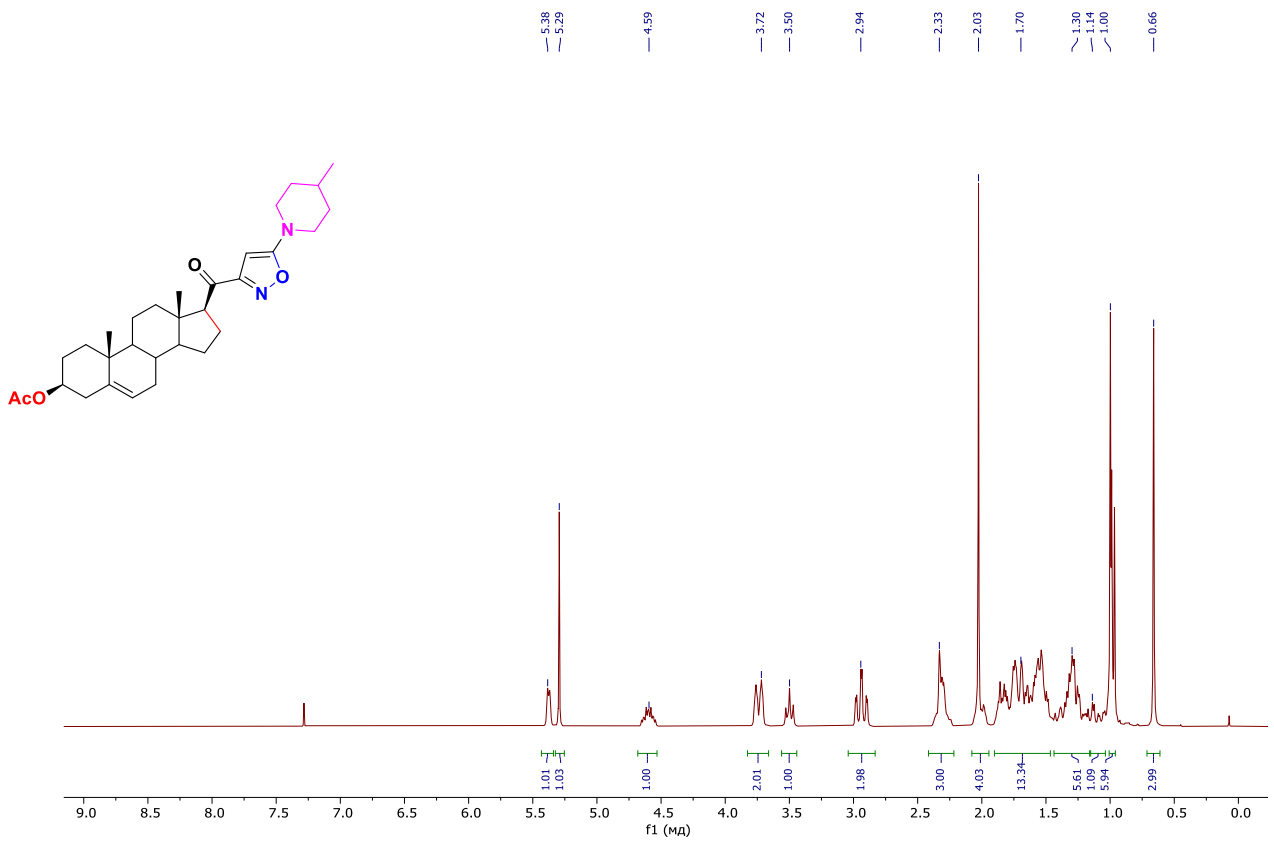

<sup>1</sup>H NMR (CDCl<sub>3</sub>, 300 MHz) spectrum of 3-acetate 20-[5'-(4''-methylpiperidine)isoxazole]-pregna-5-en-3β-ol-20-one (71)

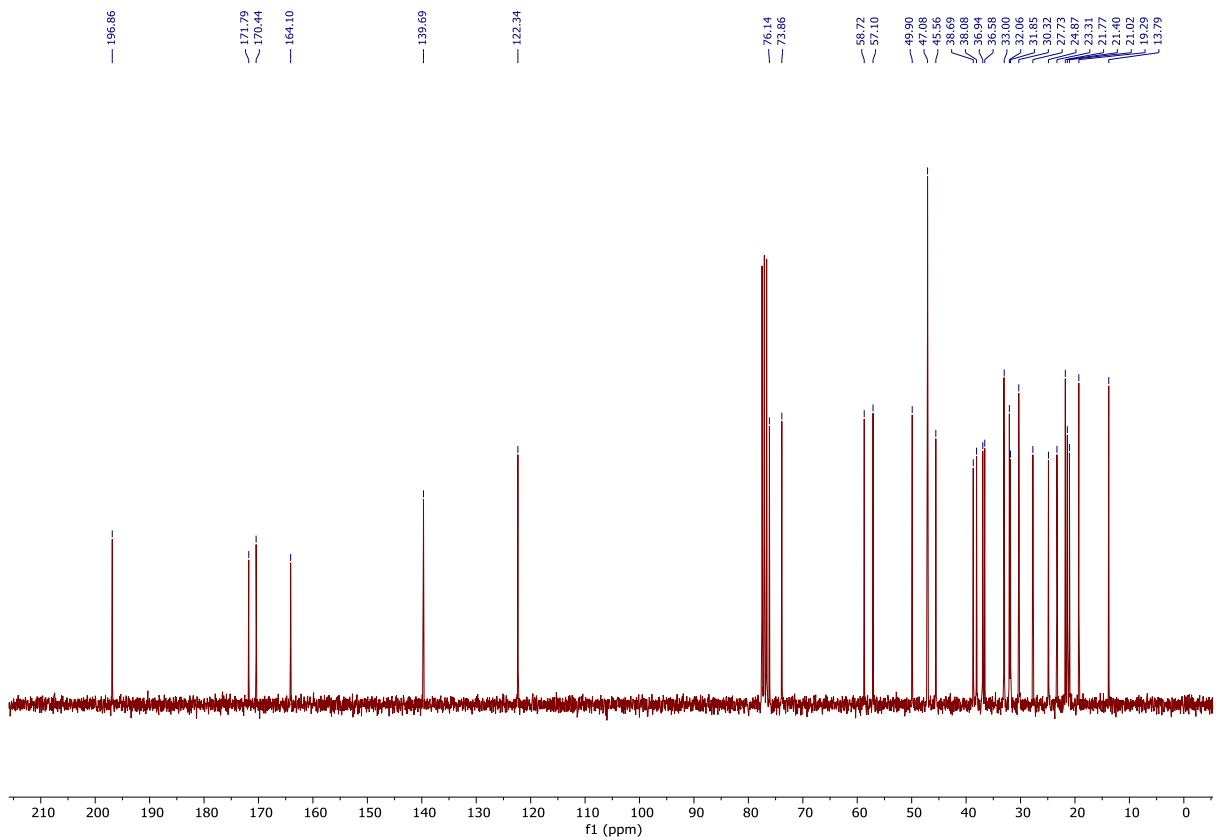

<sup>13</sup>C NMR (CDCl<sub>3</sub>, 75 MHz) spectrum of 3-acetate 20-[5'-(4''-methylpiperidine)isoxazole]-pregna-5-en-3β-ol-20-one (71)

**Analysis Info**

Analysis Name D:\Data\Kolotyrkina\2024\Volkova\0221018.d  
Method tune\_low.m  
Sample Name /YUVA Mavi-187f1  
Comment C31H44N2O4 mH509.3373 calibrant added CH3CN

Acquisition Date 21.02.2024 15:46:19  
Operator BDAL@DE  
Instrument / Ser# micrOTOF 10248

**Acquisition Parameter**

|             |            |                      |          |                  |           |
|-------------|------------|----------------------|----------|------------------|-----------|
| Source Type | ESI        | Ion Polarity         | Positive | Set Nebulizer    | 0.4 Bar   |
| Focus       | Not active |                      |          | Set Dry Heater   | 180 °C    |
| Scan Begin  | 50 m/z     | Set Capillary        | 4500 V   | Set Dry Gas      | 4.0 l/min |
| Scan End    | 3000 m/z   | Set End Plate Offset | -500 V   | Set Divert Valve | Waste     |

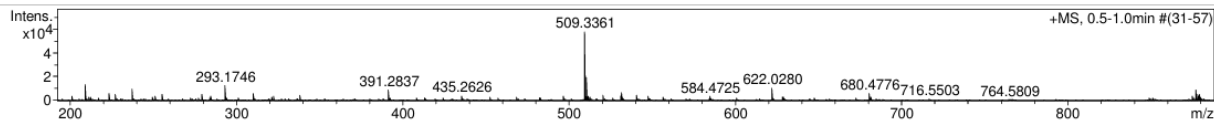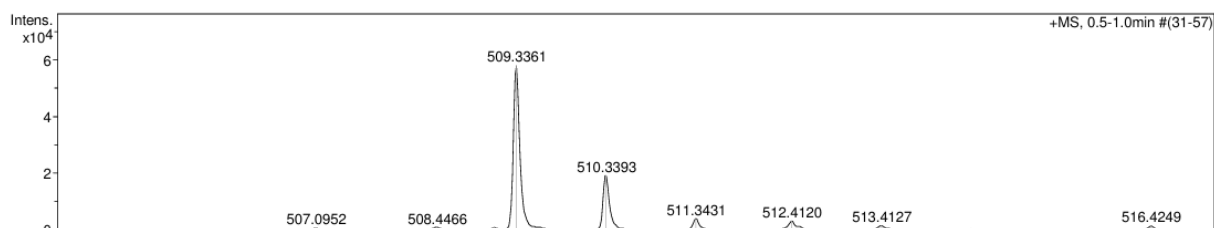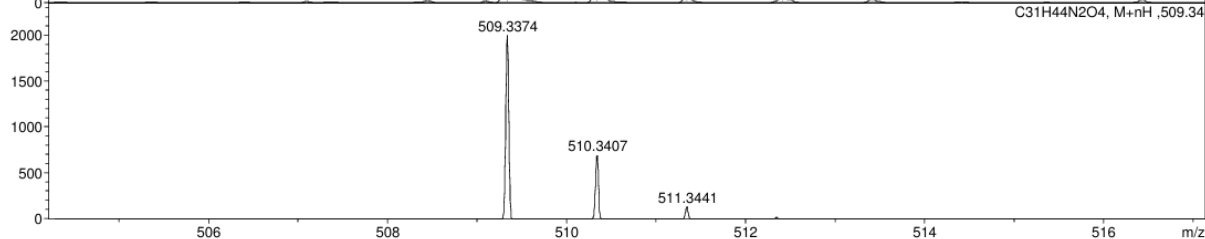

HRMS (ESI/Q-TOF) of 3-acetate 20-[5`-(4``-methylpiperidine)isoxazole]-pregna-5-en-3 $\beta$ -ol-20-one (**71**)

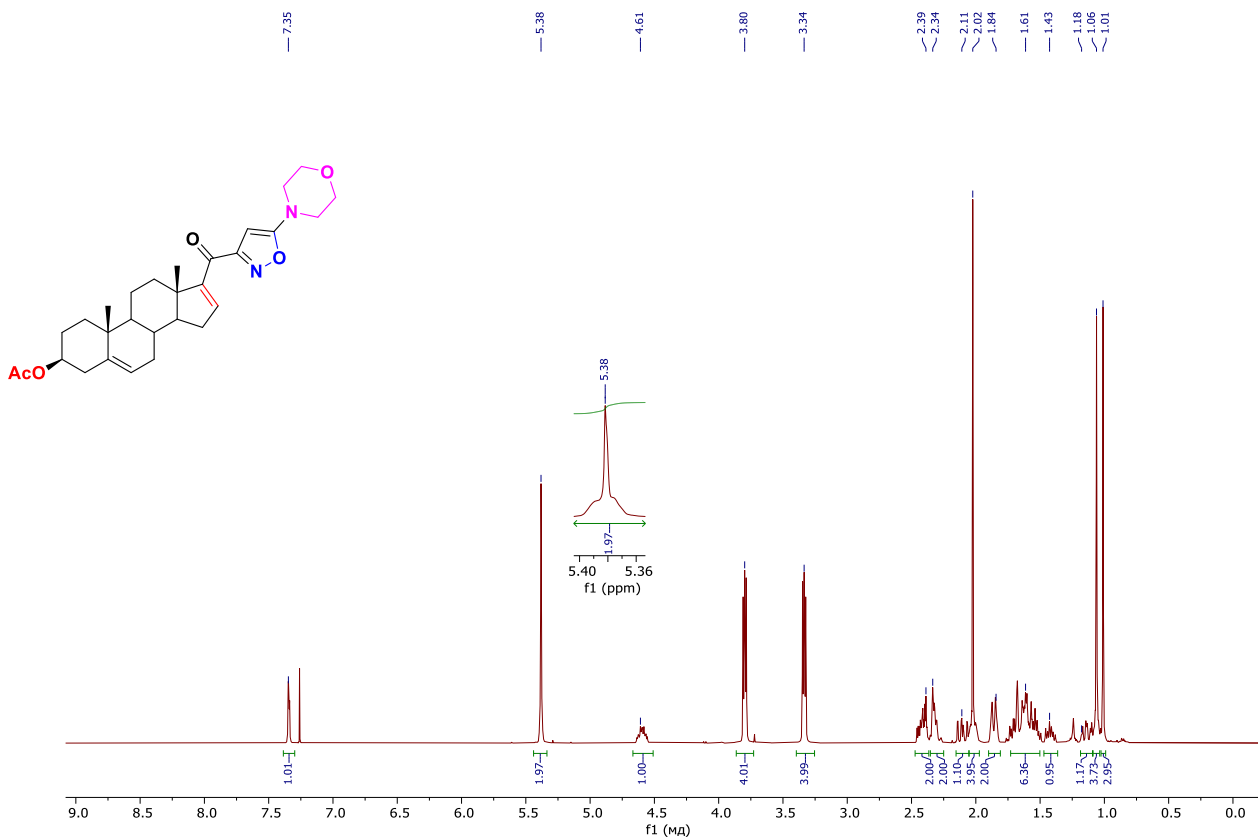

$^1\text{H}$  NMR ( $\text{CDCl}_3$ , 300 MHz) spectrum of 3-acetate 20-[3'-(5''-morpholine)isoxazole]-pregn-5,16-dien-3β-ol-20-one (**7m**)

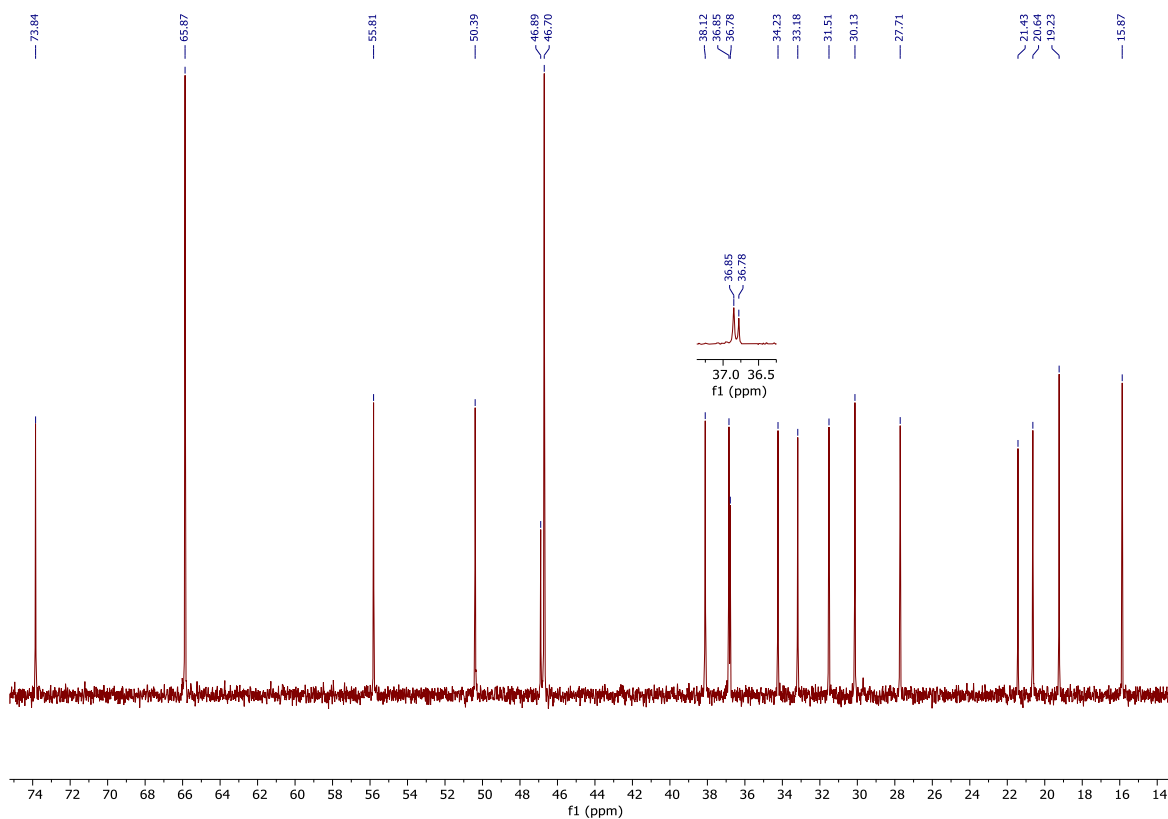

$^{13}\text{C}$  NMR ( $\text{CDCl}_3$ , 75 MHz) spectrum of 3-acetate 20-[3'-(5''-morpholine)isoxazole]-pregn-5,16-dien-3β-ol-20-one (**7m**)

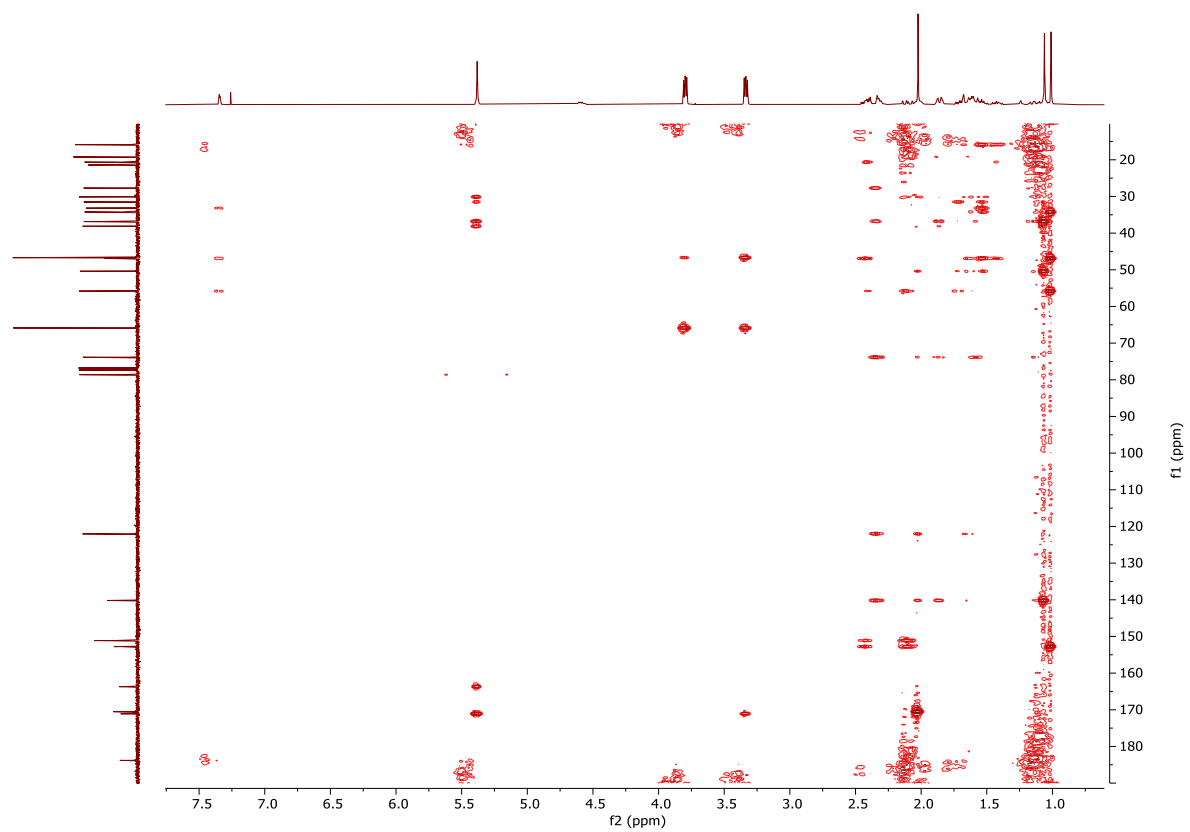

HMBC spectrum of 3-acetate 20-[3`-(5``-morpholine)isoxazole]-pregn-5,16-dien-3 $\beta$ -ol-20-one (**7m**)

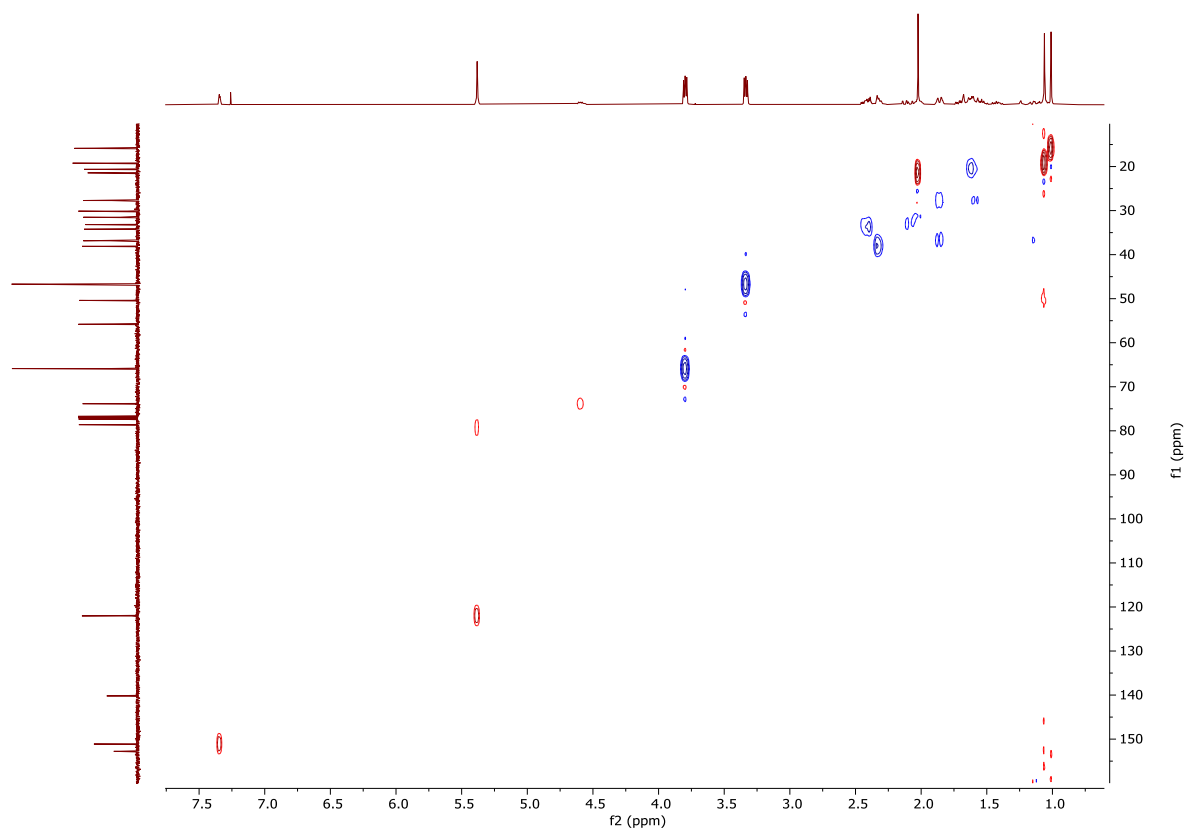

HSQC spectrum of 3-acetate 20-[3`-(5``-morpholine)isoxazole]-pregn-5,16-dien-3 $\beta$ -ol-20-one (**7m**)

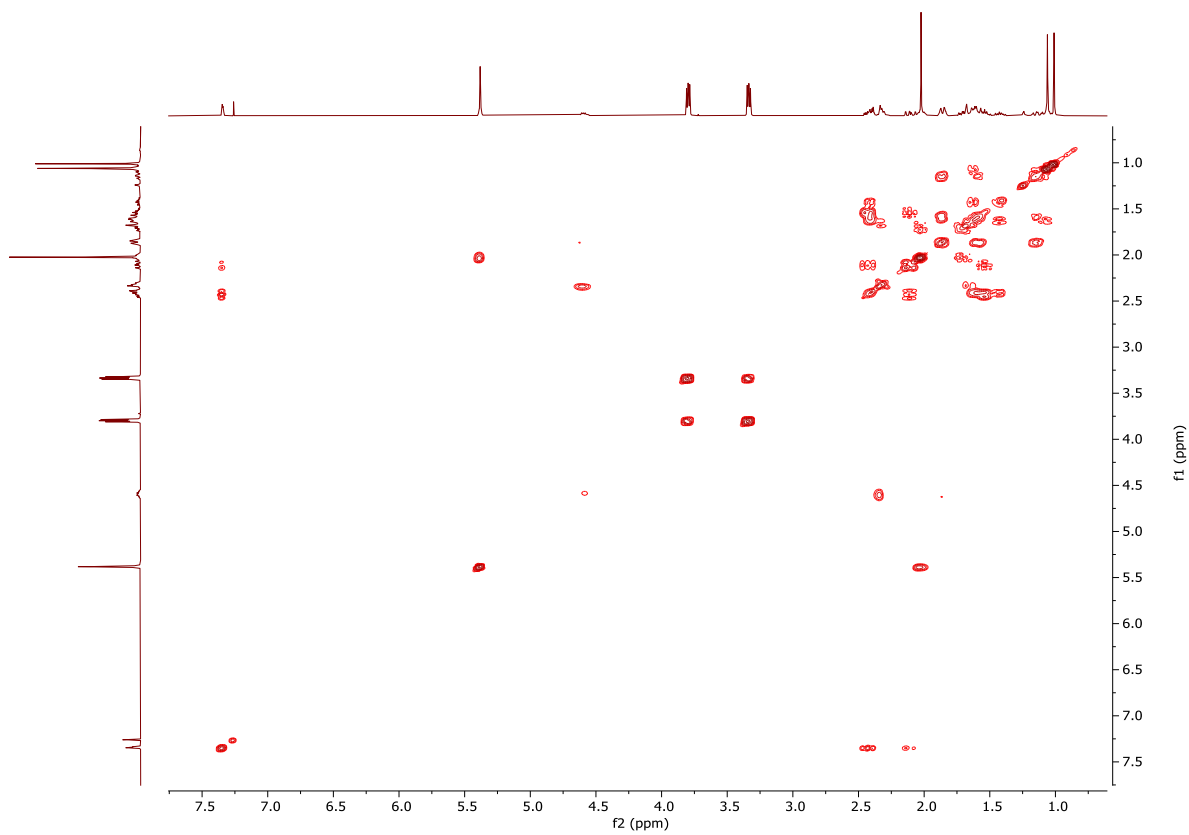

COSY spectrum of 3-acetate 20-[3`-(5``-morpholine)isoxazole]-pregn-5,16-dien-3 $\beta$ -ol-20-one (**7m**)

**Analysis Info**

Analysis Name D:\Data\Kolotyrkina\2023\Malahova\1011003.d  
Method tune\_low.m  
Sample Name /YUVA Vika-003  
Comment C29H38N2O5 mH 495.2853 calibrant added CH3OH

Acquisition Date 11.10.2023 10:31:37  
Operator BDAL@DE  
Instrument / Ser# micrOTOF 10248

**Acquisition Parameter**

|             |            |                      |          |                  |           |
|-------------|------------|----------------------|----------|------------------|-----------|
| Source Type | ESI        | Ion Polarity         | Positive | Set Nebulizer    | 0.4 Bar   |
| Focus       | Not active |                      |          | Set Dry Heater   | 180 °C    |
| Scan Begin  | 50 m/z     | Set Capillary        | 4500 V   | Set Dry Gas      | 4.0 l/min |
| Scan End    | 3000 m/z   | Set End Plate Offset | -500 V   | Set Divert Valve | Waste     |

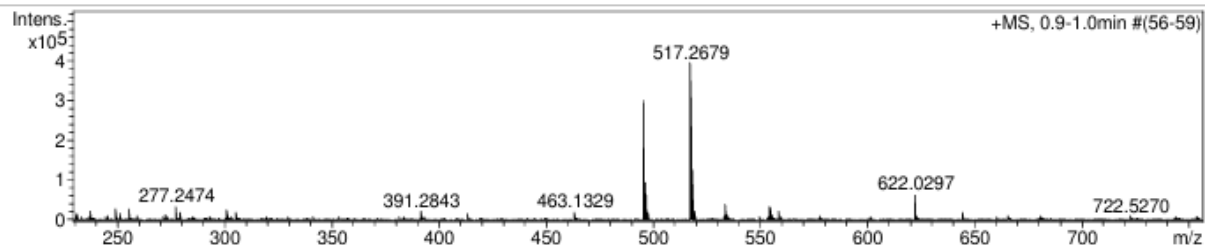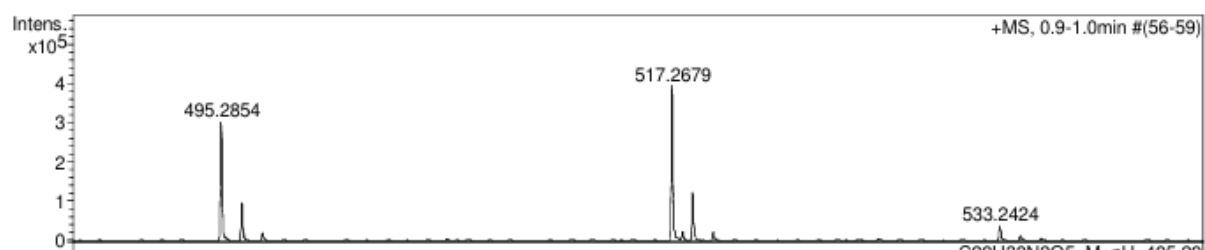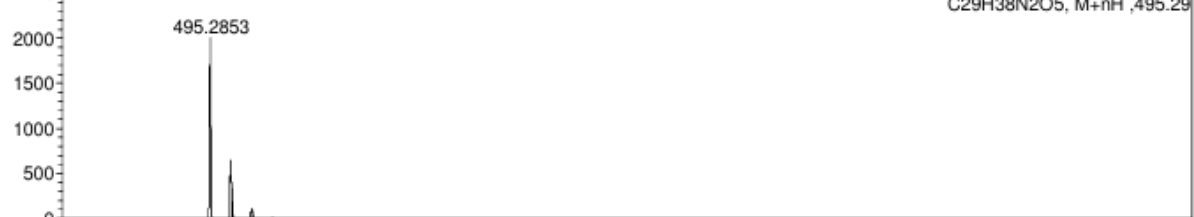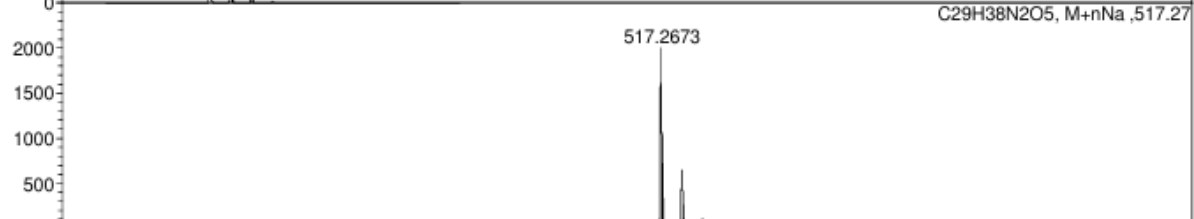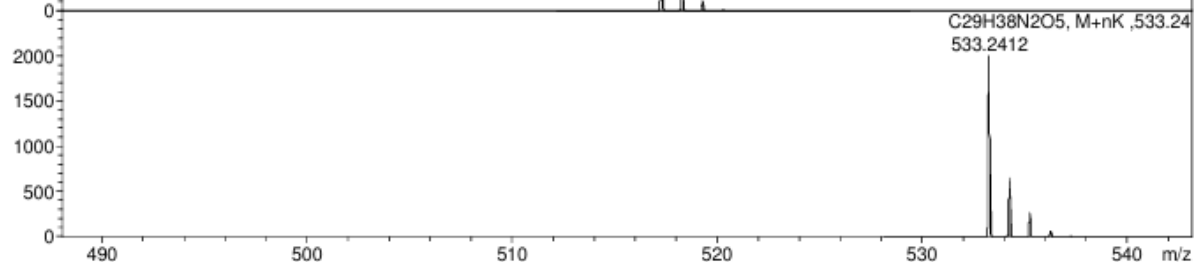

HRMS (ESI/Q-TOF) of 3-acetate 20-[3'-(5''-morpholine)isoxazole]-pregn-5,16-dien-3 $\beta$ -ol-20-one (**7m**)

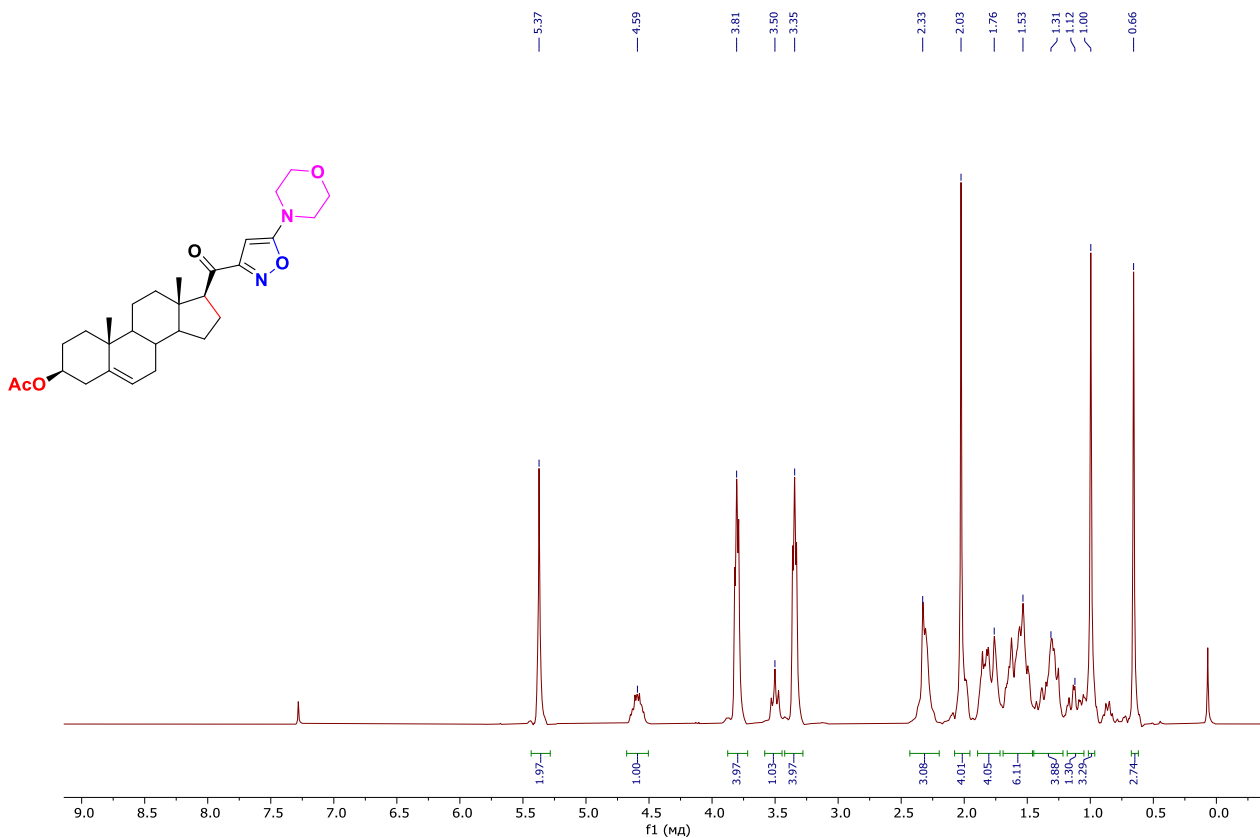

<sup>1</sup>H NMR (CDCl<sub>3</sub>, 300 MHz) spectrum of 3-acetate 20-(5'-morpholineisoxazole)-pregna-5-en-3β-ol-20-one (7n)

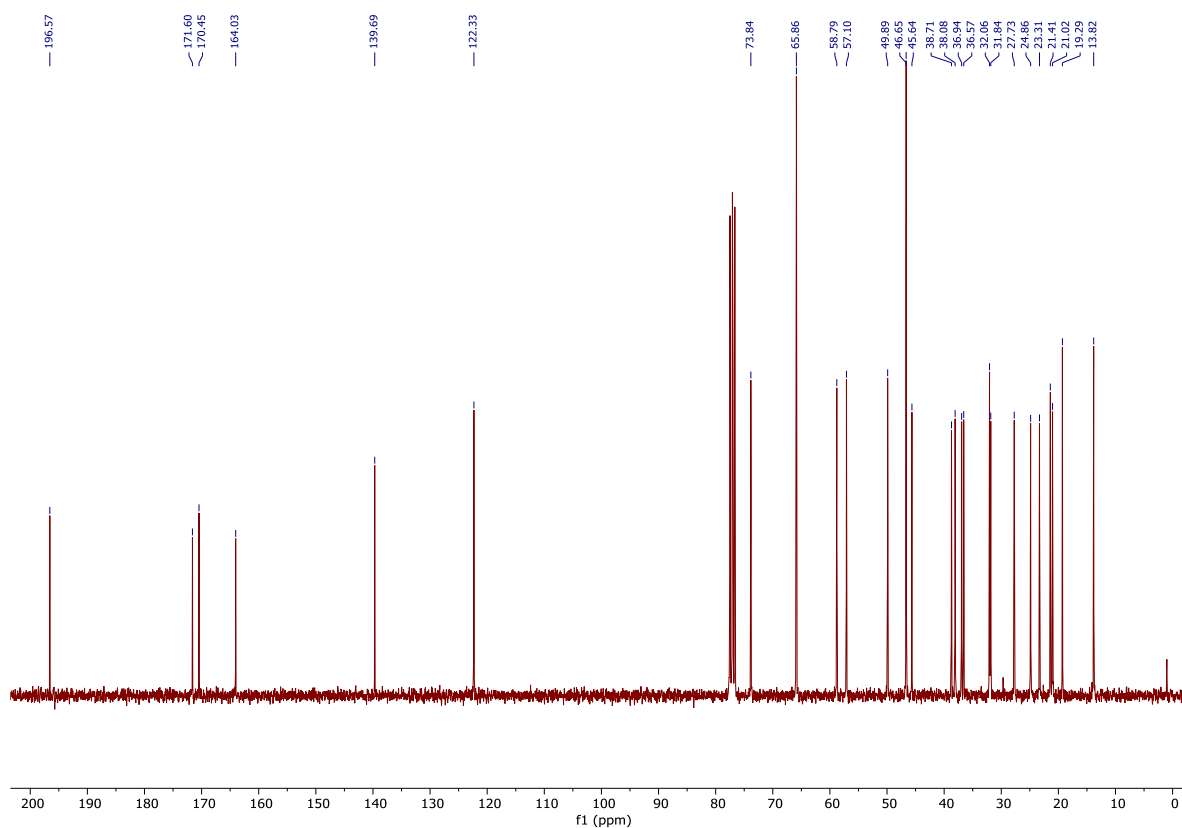

<sup>13</sup>C NMR (CDCl<sub>3</sub>, 75 MHz) spectrum of 3-acetate 20-(5'-morpholineisoxazole)-pregna-5-en-3β-ol-20-one (7n)

**Analysis Info**

Analysis Name D:\Data\Kolotyrkina\2024\Volkova\0110013.d  
Method tune\_low.m  
Sample Name /YUVA MaVi-174f1  
Comment C29H40N2O5 mH 397.3020 calibrant added CH3OH

Acquisition Date 10.01.2024 17:46:00

Operator BDAL@DE  
Instrument / Ser# micrOTOF 10248

**Acquisition Parameter**

|             |            |                      |          |                  |           |
|-------------|------------|----------------------|----------|------------------|-----------|
| Source Type | ESI        | Ion Polarity         | Positive | Set Nebulizer    | 0.4 Bar   |
| Focus       | Not active |                      |          | Set Dry Heater   | 180 °C    |
| Scan Begin  | 50 m/z     | Set Capillary        | 4500 V   | Set Dry Gas      | 4.0 l/min |
| Scan End    | 3000 m/z   | Set End Plate Offset | -500 V   | Set Divert Valve | Waste     |

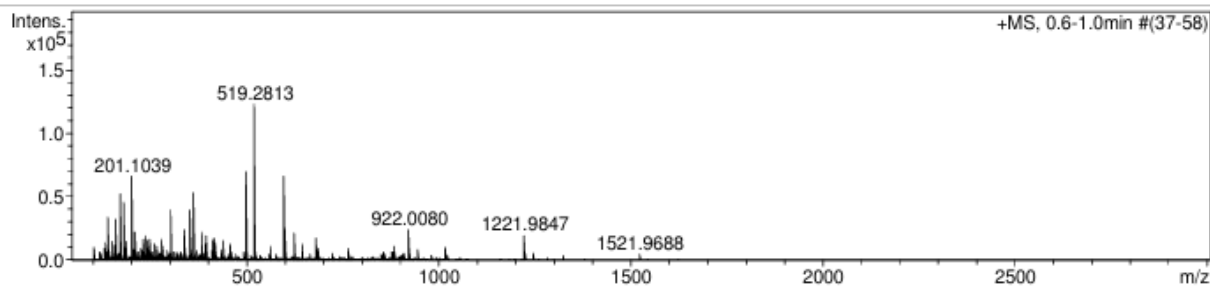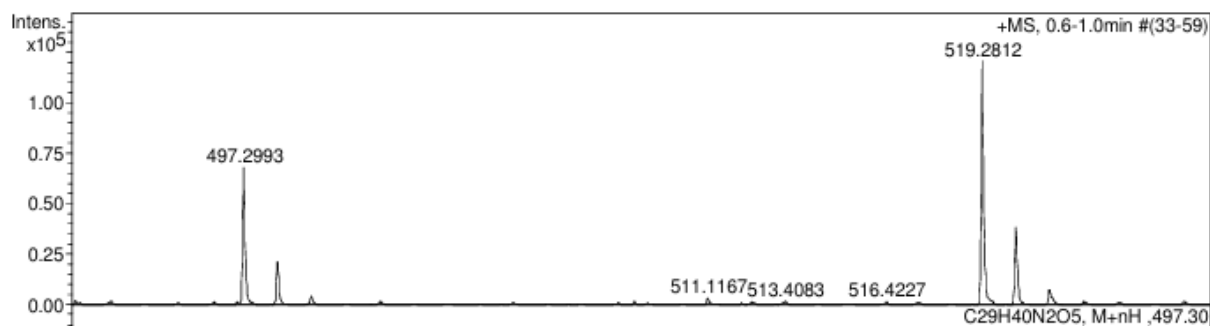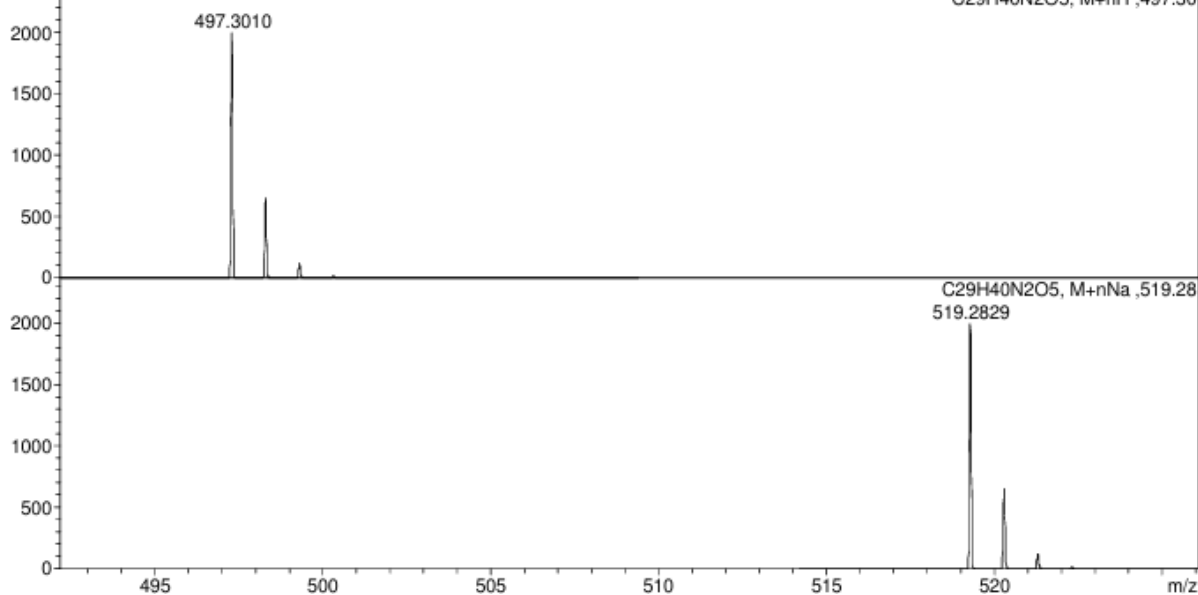

HRMS (ESI/Q-TOF) of 3-acetate 20-(5'-moroholineisoxazole)-pregna-5-en-3 $\beta$ -ol-20-one (**7n**)

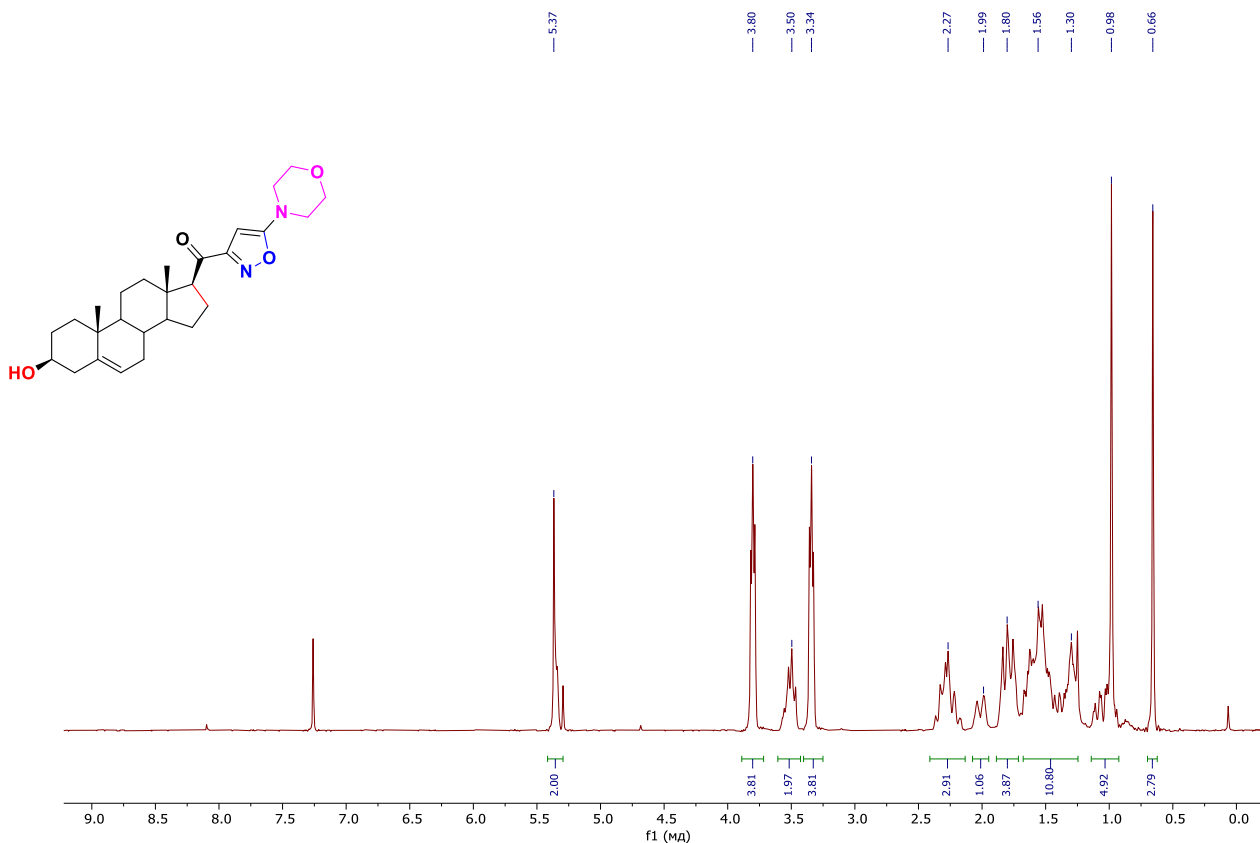

<sup>1</sup>H NMR (CDCl<sub>3</sub>, 300 MHz) spectrum of 20-[3'-(5''-morpholine)isoxazole]-pregn-5-en-3β-ol-20-one (7o)

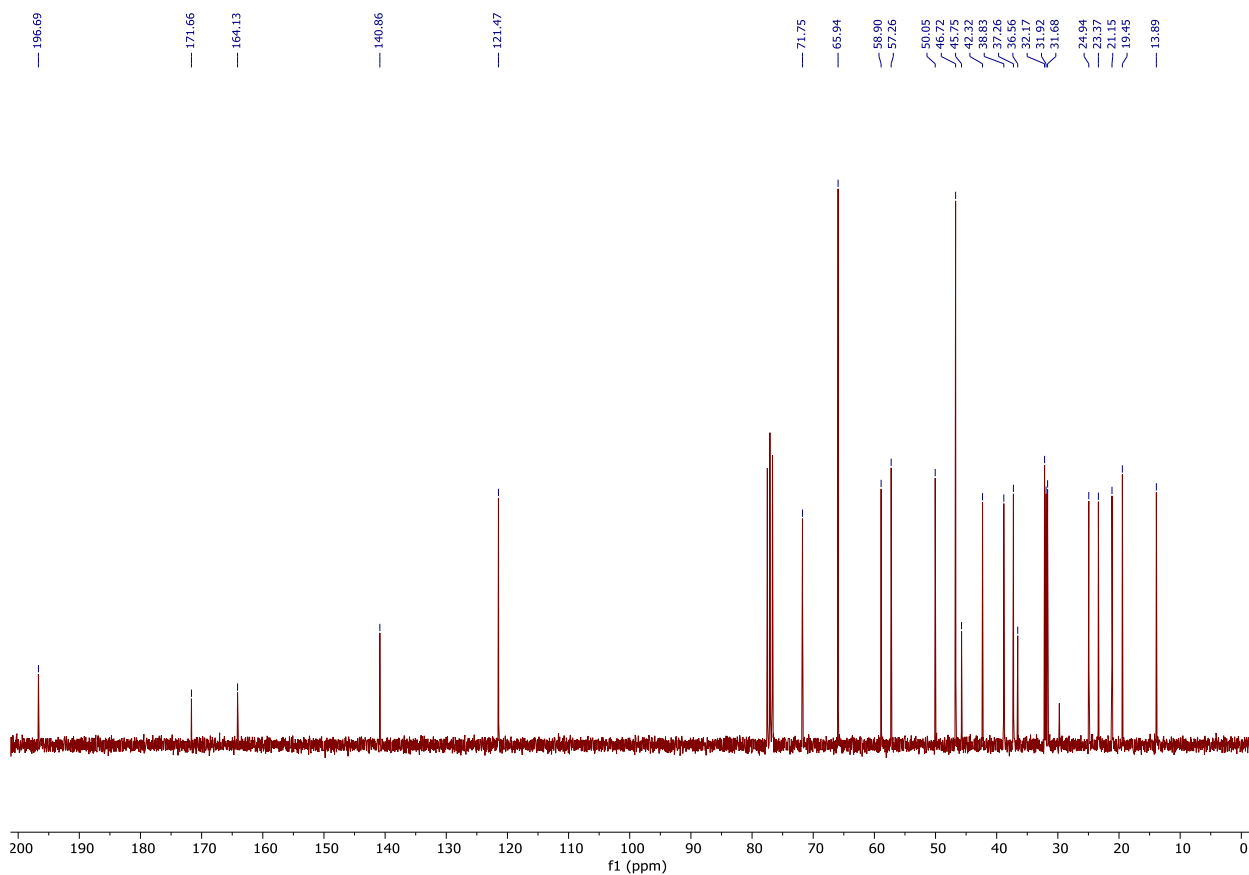

<sup>13</sup>C NMR (CDCl<sub>3</sub>, 75 MHz) spectrum of 20-[3'-(5''-morpholine)isoxazole]-pregn-5-en-3β-ol-20-one (7o)

**Analysis Info**

Analysis Name D:\Data\Kolotyrkina\2024\Malahova\0320042.d  
Method tune\_low.m  
Sample Name /YUVA MaVi-195f1  
Comment C27H38N2O4 mH455.2915 calibrant added CH3OH

Acquisition Date 20.03.2024 17:25:41

Operator BDAL@DE  
Instrument / Ser# micrOTOF 10248

**Acquisition Parameter**

|             |            |                      |          |                  |           |
|-------------|------------|----------------------|----------|------------------|-----------|
| Source Type | ESI        | Ion Polarity         | Positive | Set Nebulizer    | 0.4 Bar   |
| Focus       | Not active |                      |          | Set Dry Heater   | 180 °C    |
| Scan Begin  | 50 m/z     | Set Capillary        | 4500 V   | Set Dry Gas      | 4.0 l/min |
| Scan End    | 3000 m/z   | Set End Plate Offset | -500 V   | Set Divert Valve | Waste     |

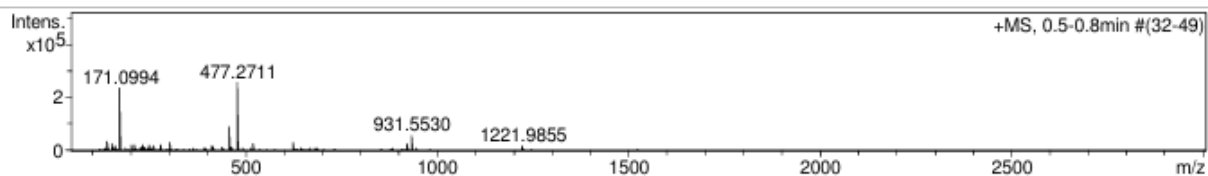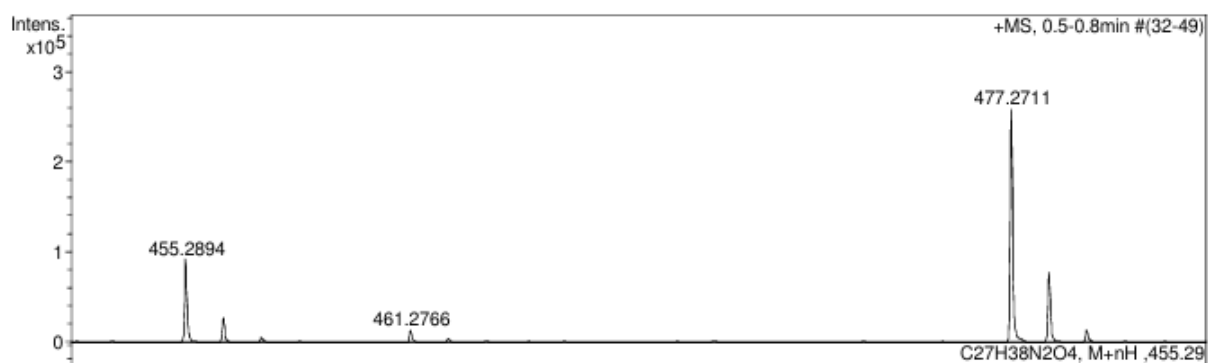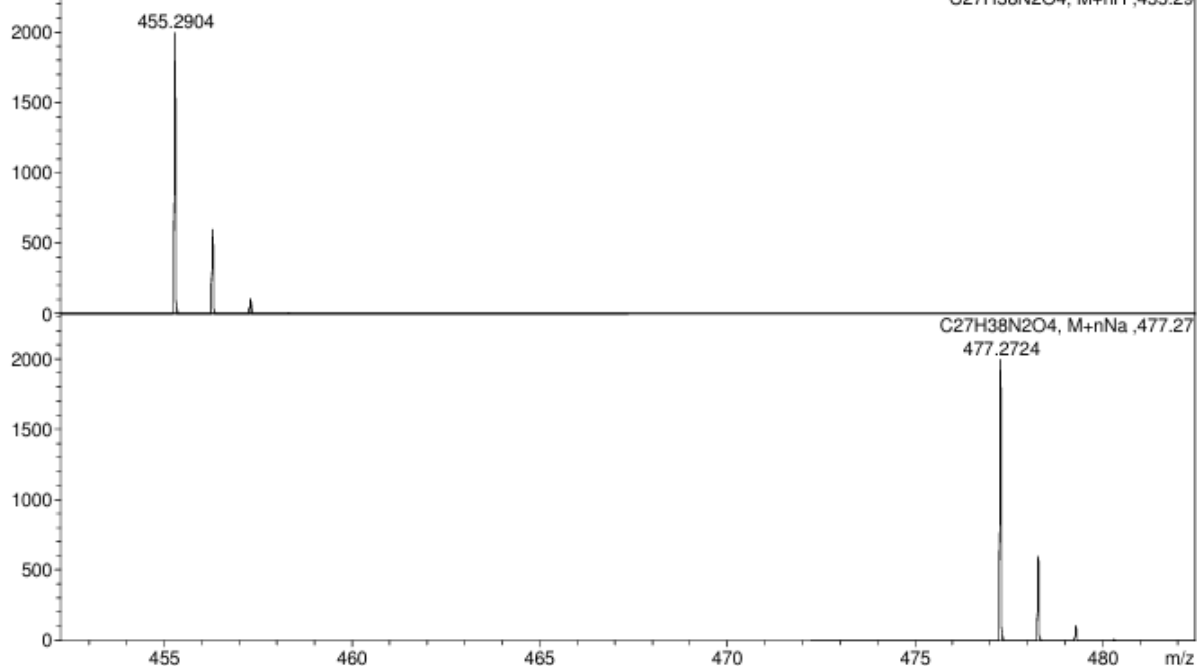

HRMS (ESI/Q-TOF) of 20-[3'-(5''-morpholine)isoxazole]-pregn-5-en-3 $\beta$ -ol-20-one (**7o**)

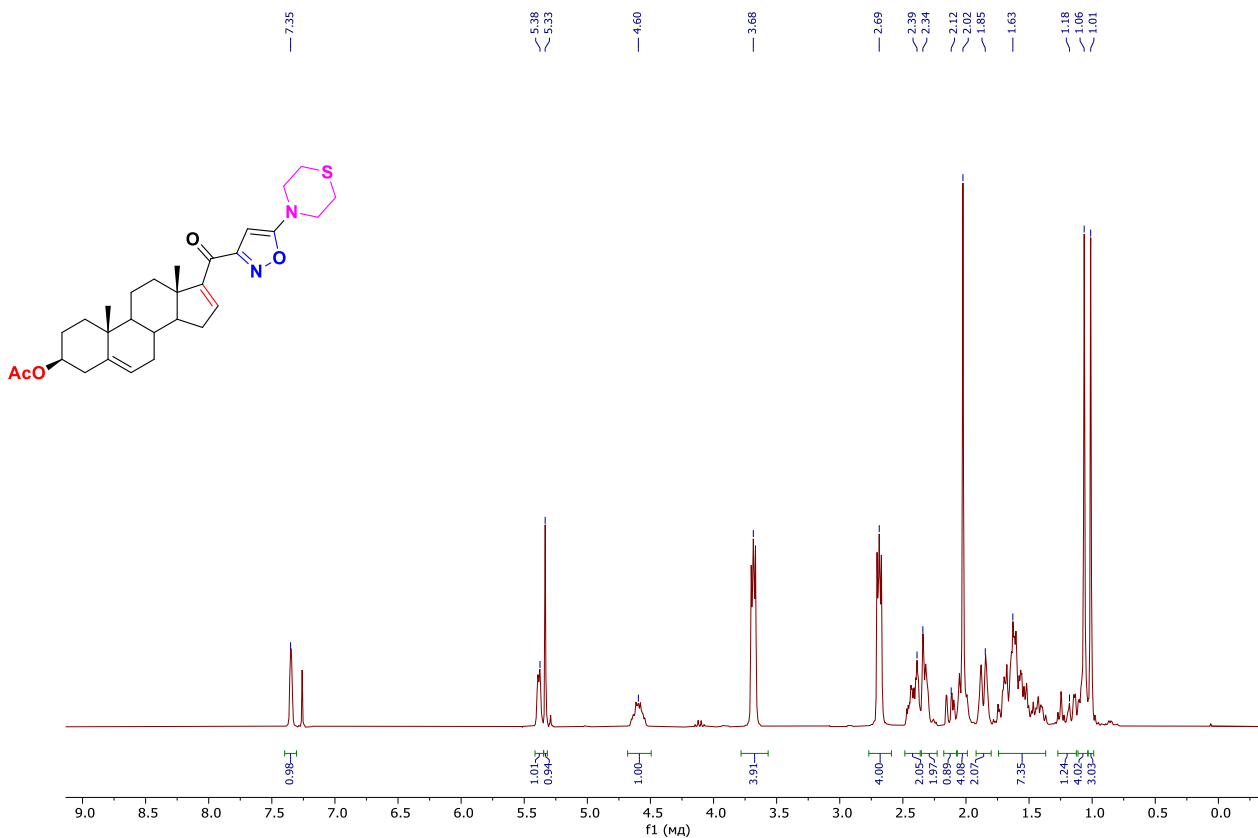

<sup>1</sup>H NMR (300 MHz, CDCl<sub>3</sub>) spectrum of 3-acetate 20-[3'-(5''-tiomorfoline)isoxazole]-pregn-5,16-dien-3β-ol-20-one (7p)

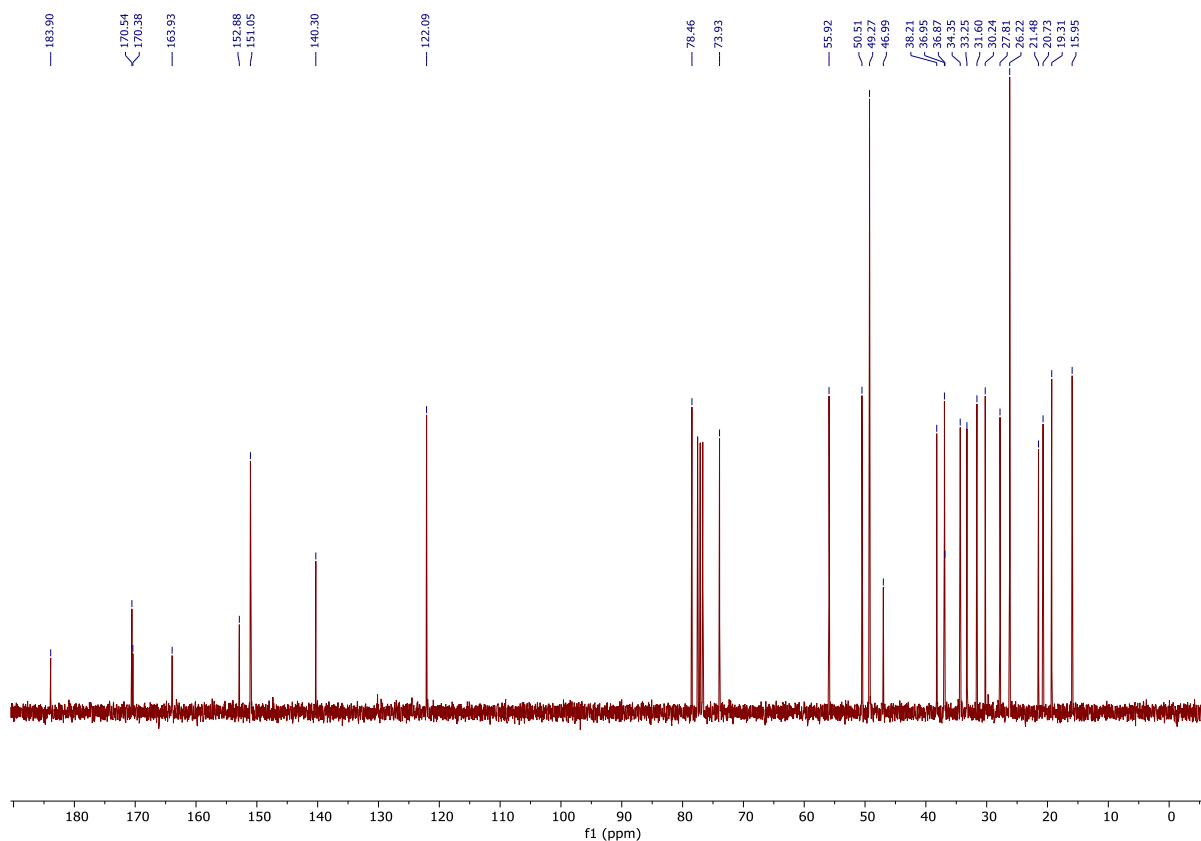

<sup>13</sup>C NMR (75 MHz, CDCl<sub>3</sub>) spectrum of 3-acetate 20-[3'-(5''-tiomorfoline)isoxazole]-pregn-5,16-dien-3β-ol-20-one (7p)

**Analysis Info**

Analysis Name D:\Data\Kolotyrkina\2024\Volkova\0208040.d  
Method tune\_low.m  
Sample Name /YUVA vika-21f2  
Comment C29H38N2O4S mH511.2625 calibrant added CH3OH

Acquisition Date 08.02.2024 17:53:49

Operator BDAL@DE  
Instrument / Ser# micrOTOF 10248

**Acquisition Parameter**

|             |            |                      |          |                  |           |
|-------------|------------|----------------------|----------|------------------|-----------|
| Source Type | ESI        | Ion Polarity         | Positive | Set Nebulizer    | 0.4 Bar   |
| Focus       | Not active |                      |          | Set Dry Heater   | 180 °C    |
| Scan Begin  | 50 m/z     | Set Capillary        | 4500 V   | Set Dry Gas      | 4.0 l/min |
| Scan End    | 3000 m/z   | Set End Plate Offset | -500 V   | Set Divert Valve | Waste     |

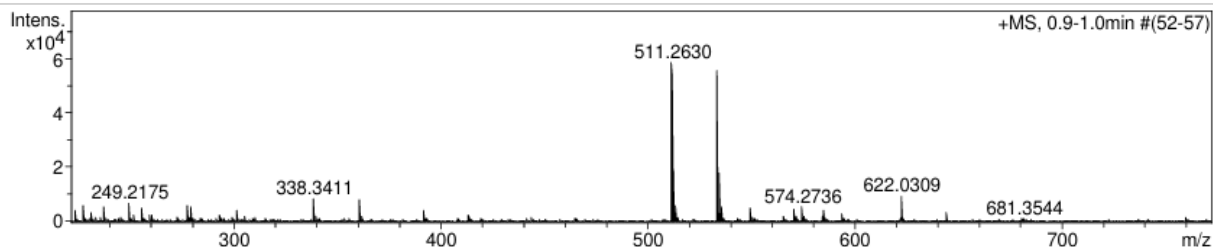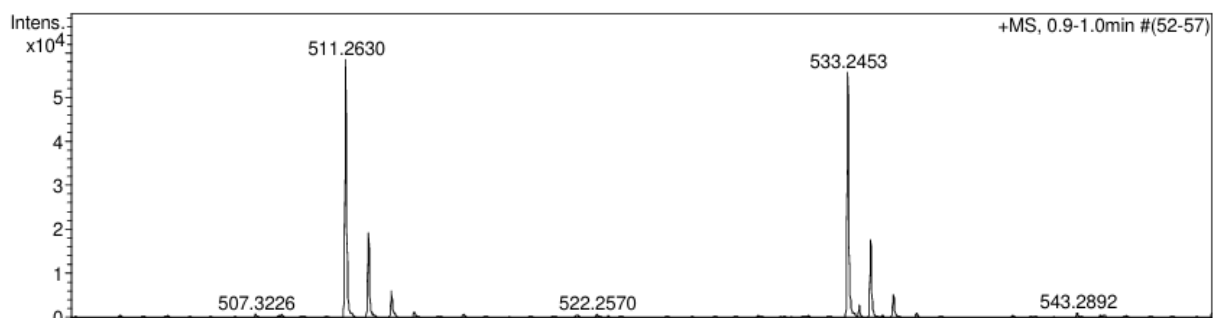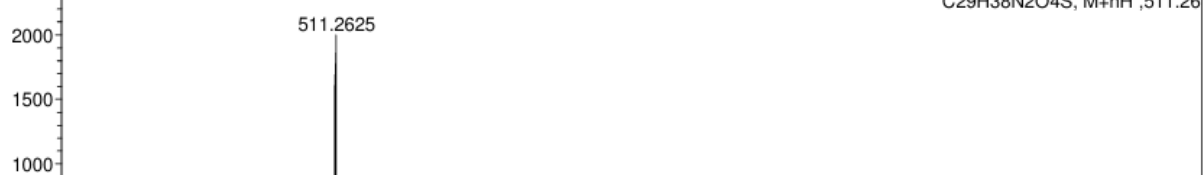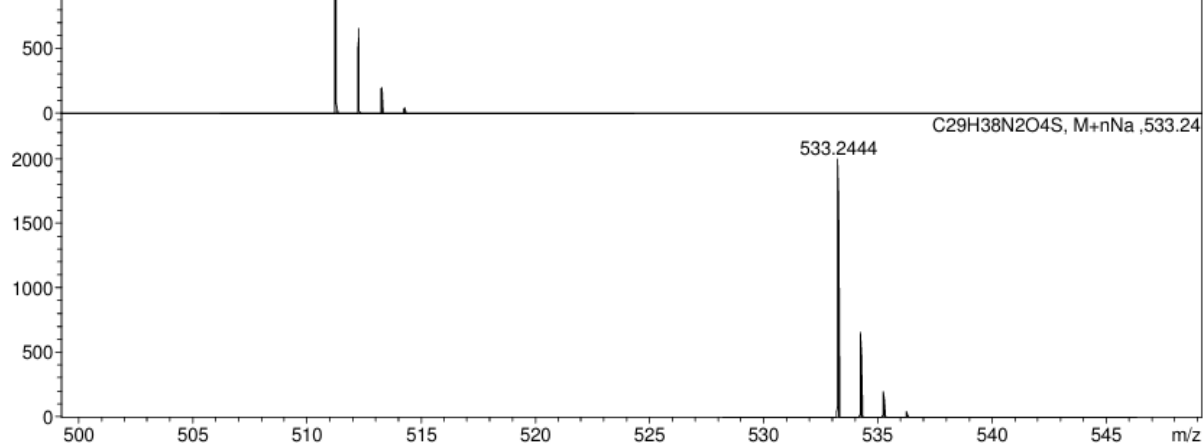

HRMS (ESI/Q-TOF) of 3-acetate 20-[3<sup>-</sup>-(5<sup>-</sup>-tiomorphone)isoxazole]-pregn-5,16-dien-3 $\beta$ -ol-20-one (**7p**)

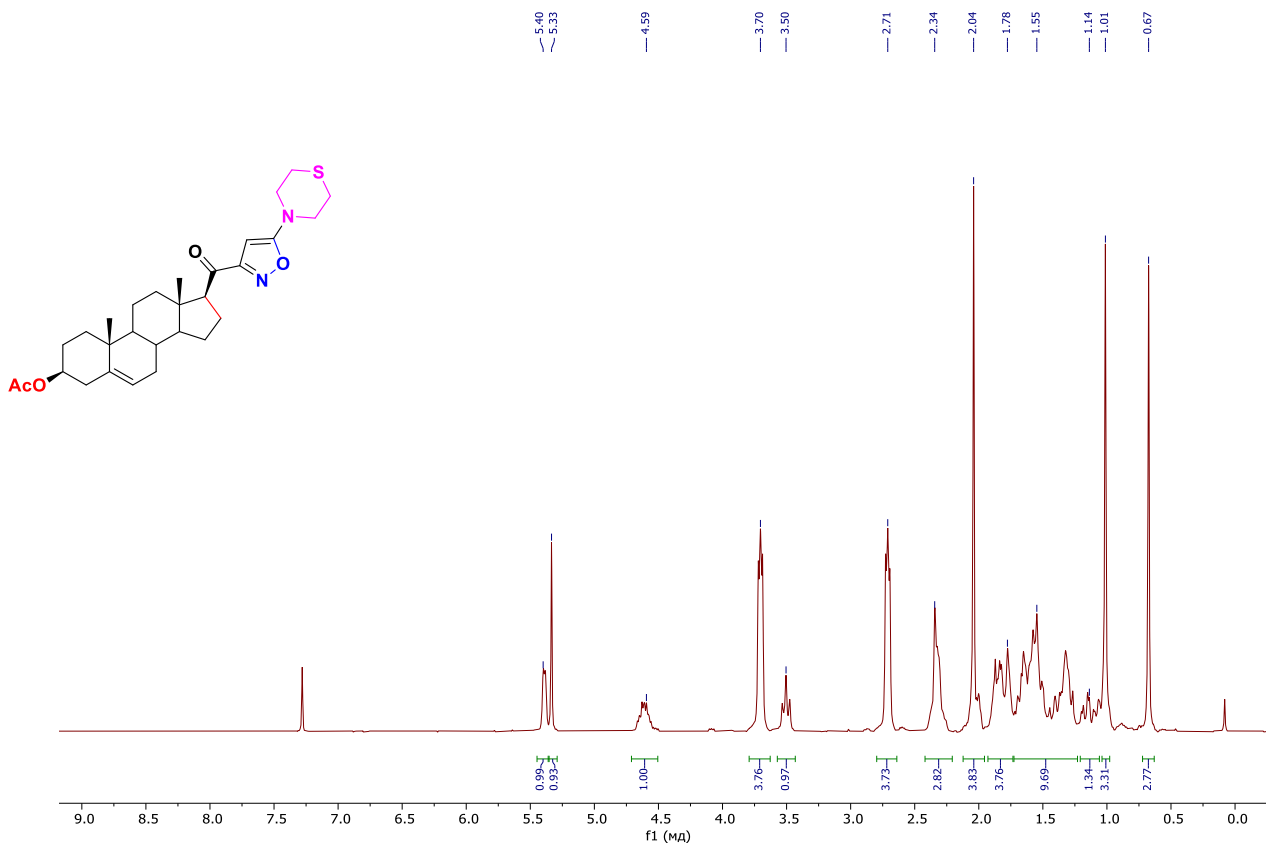

<sup>1</sup>H NMR (CDCl<sub>3</sub>, 300 MHz) spectrum of 3-acetate 20-(5'-tiomoroholineisoxazole)-pregna-5-en-3 $\beta$ -ol-20-one (**7q**)

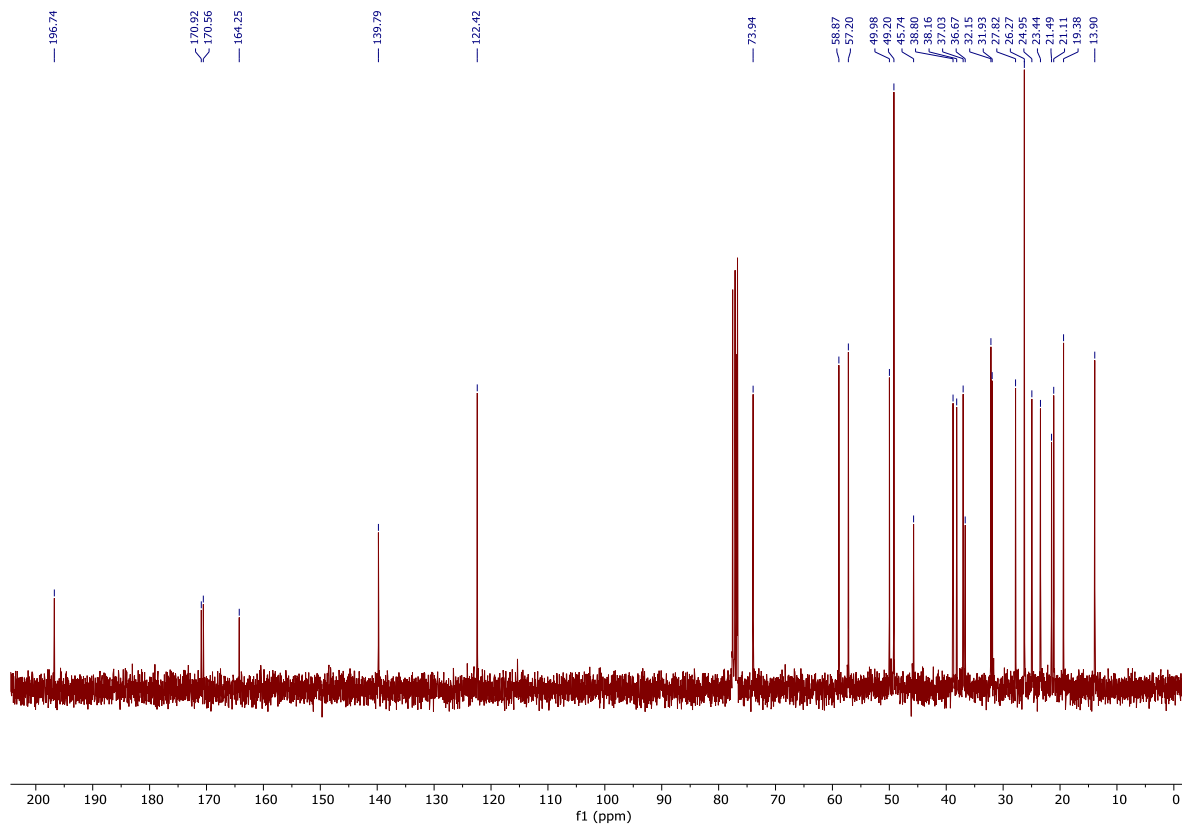

<sup>13</sup>C NMR (CDCl<sub>3</sub>, 75 MHz) spectrum of 3-acetate 20-(5'-tiomoroholineisoxazole)-pregna-5-en-3 $\beta$ -ol-20-one (**7q**)

**Analysis Info**

Analysis Name D:\Data\Kolotyrkina\2024\Volkova\0131025.d  
Method tune\_low.m  
Sample Name /YUVA MaVi-175f1.3  
Comment C29H40N2O4S mH513.2781 calibrant added CH3OH

Acquisition Date 31.01.2024 15:00:59

Operator BDAL@DE  
Instrument / Ser# micrOTOF 10248

**Acquisition Parameter**

|             |            |                      |          |                  |           |
|-------------|------------|----------------------|----------|------------------|-----------|
| Source Type | ESI        | Ion Polarity         | Positive | Set Nebulizer    | 0.4 Bar   |
| Focus       | Not active |                      |          | Set Dry Heater   | 180 °C    |
| Scan Begin  | 50 m/z     | Set Capillary        | 4500 V   | Set Dry Gas      | 4.0 l/min |
| Scan End    | 3000 m/z   | Set End Plate Offset | -500 V   | Set Divert Valve | Waste     |

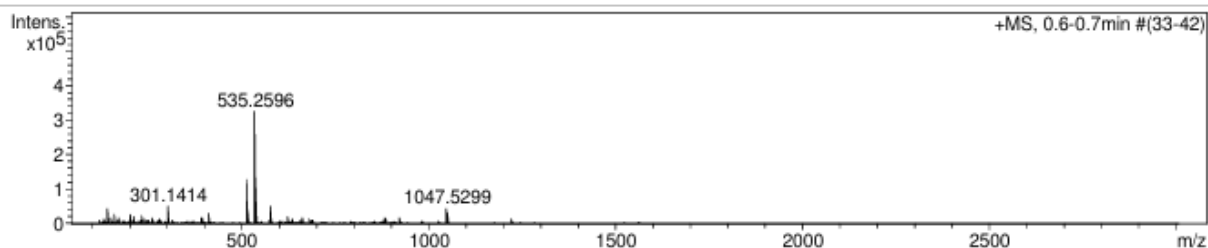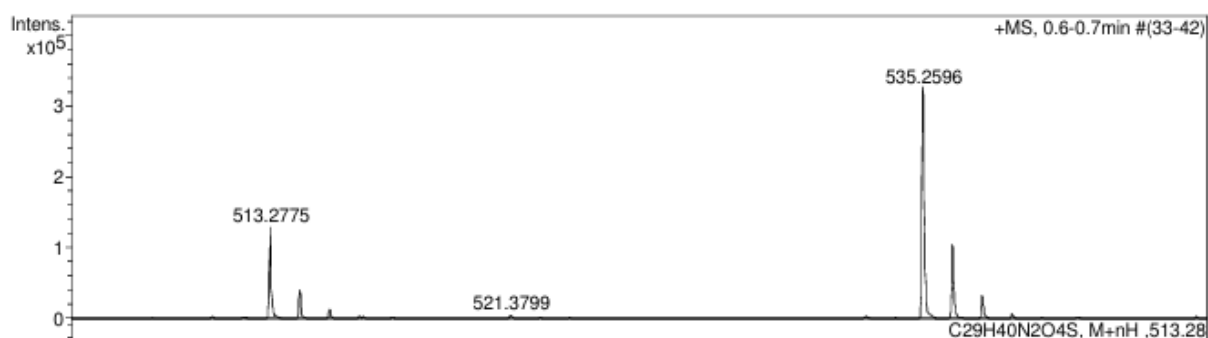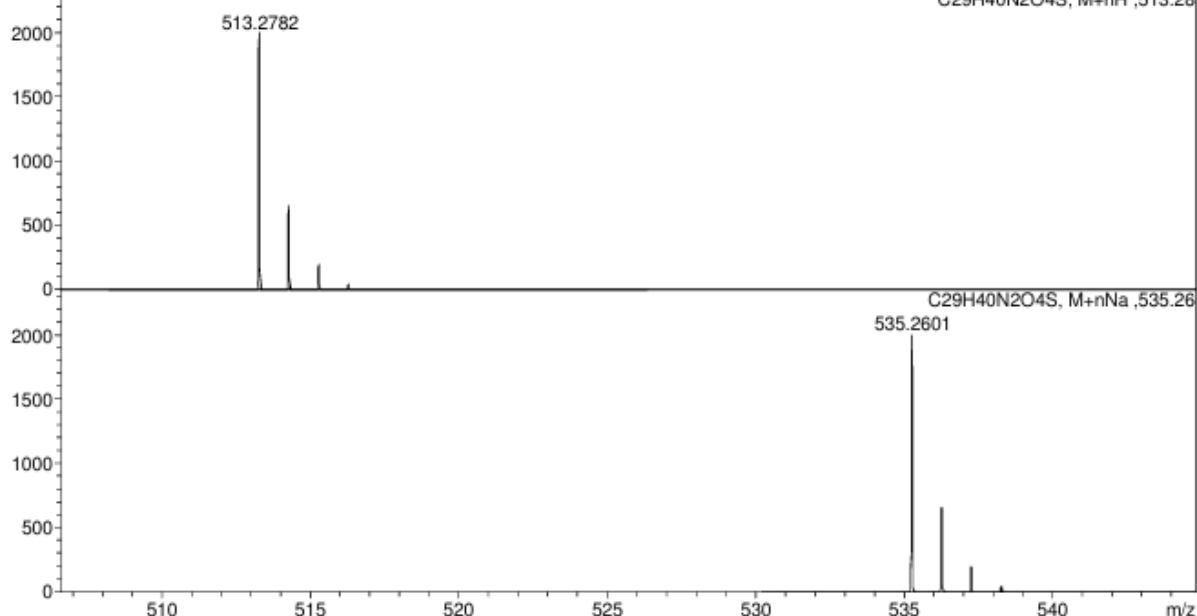

HRMS (ESI/Q-TOF) of 3-acetate 20-(5'-tiomorholineisoxazole)-pregna-5-en-3 $\beta$ -ol-20-one (**7q**)

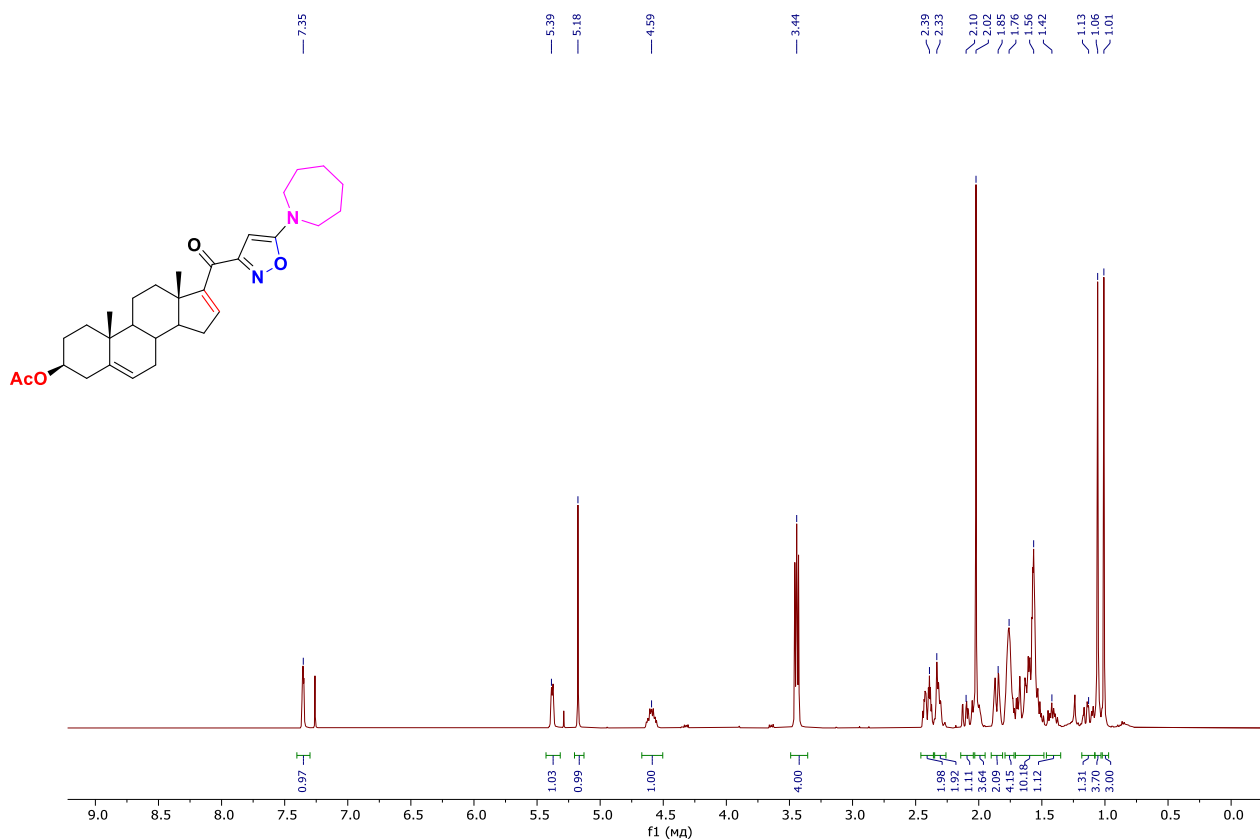

<sup>1</sup>H NMR (300 MHz, CDCl<sub>3</sub>) spectrum of 3-acetate 20-[3''-(5'-azepane)isoxazole]-pregn-5,16-dien-3β-ol-20-one (7r)

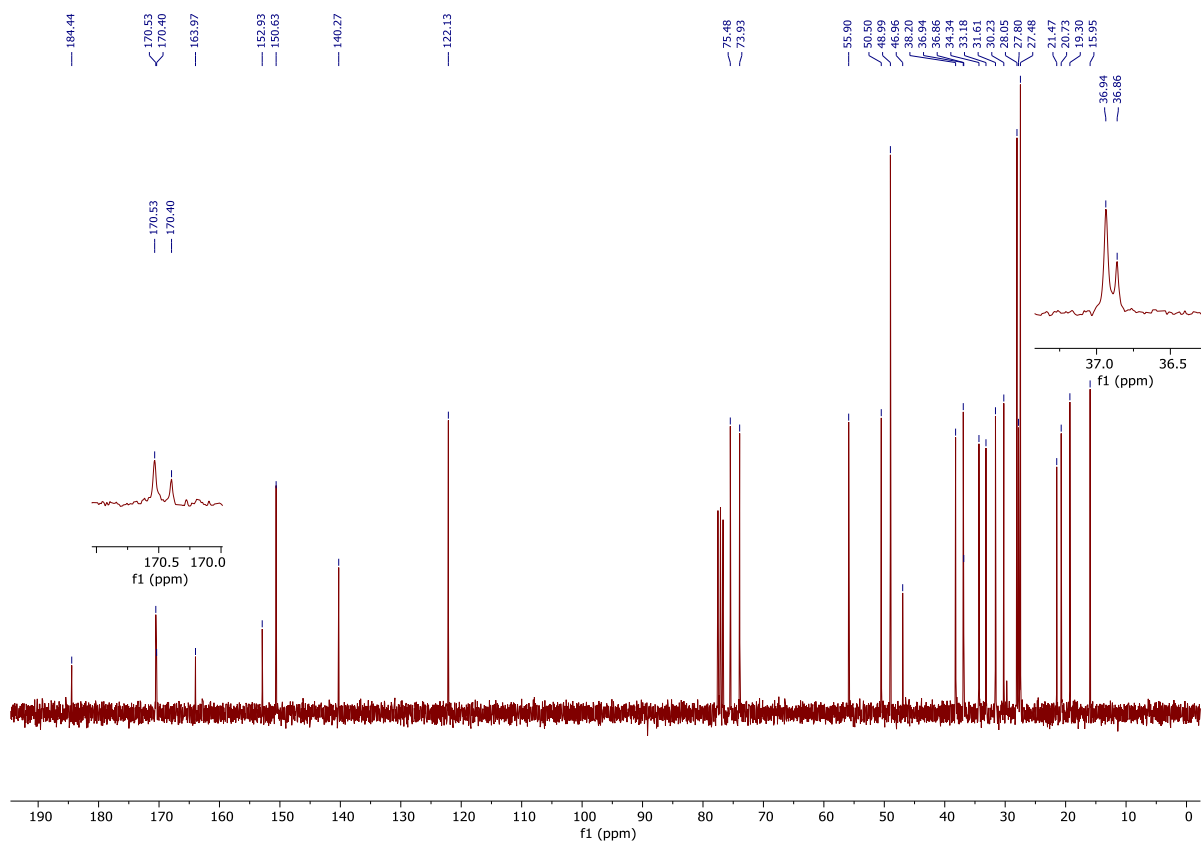

<sup>13</sup>C NMR (75 MHz, CDCl<sub>3</sub>) spectrum of 3-acetate 20-[3''-(5'-azepane)isoxazole]-pregn-5,16-dien-3β-ol-20-one (7r)

**Analysis Info**

Analysis Name D:\Data\Kolotyrkina\2024\Volkova\0208039.d  
Method tune\_low.m  
Sample Name /YUVA vika-23f1  
Comment C31H42N2O4 mH507.3217 calibrant added CH3OH

Acquisition Date 08.02.2024 17:48:50

Operator BDAL@DE  
Instrument / Ser# micrOTOF 10248

**Acquisition Parameter**

|             |            |                      |          |                  |           |
|-------------|------------|----------------------|----------|------------------|-----------|
| Source Type | ESI        | Ion Polarity         | Positive | Set Nebulizer    | 0.4 Bar   |
| Focus       | Not active |                      |          | Set Dry Heater   | 180 °C    |
| Scan Begin  | 50 m/z     | Set Capillary        | 4500 V   | Set Dry Gas      | 4.0 l/min |
| Scan End    | 3000 m/z   | Set End Plate Offset | -500 V   | Set Divert Valve | Waste     |

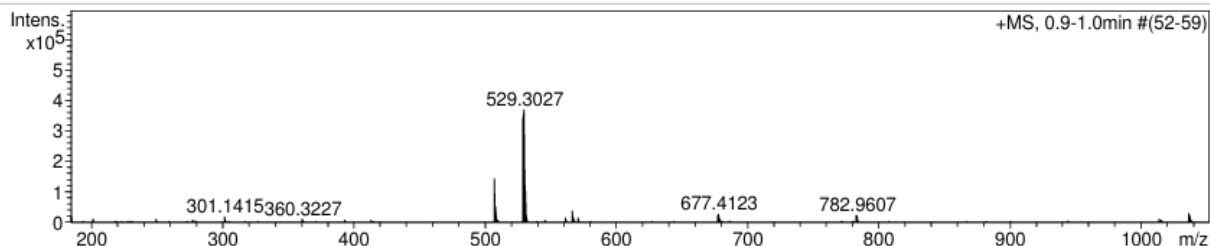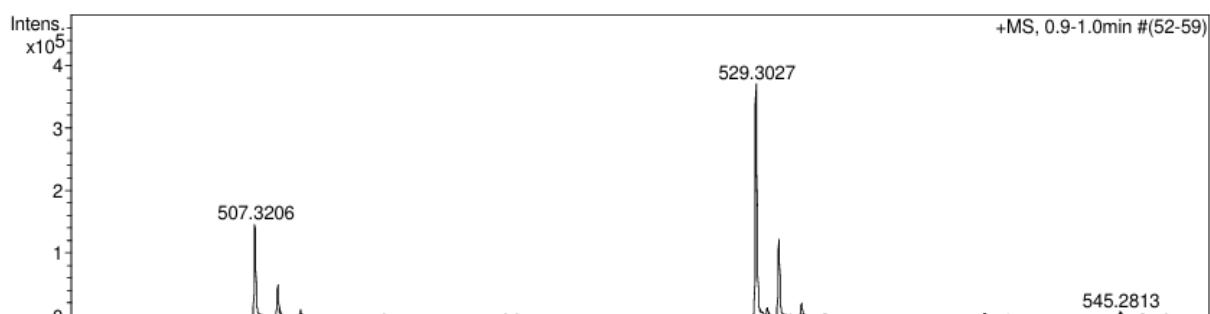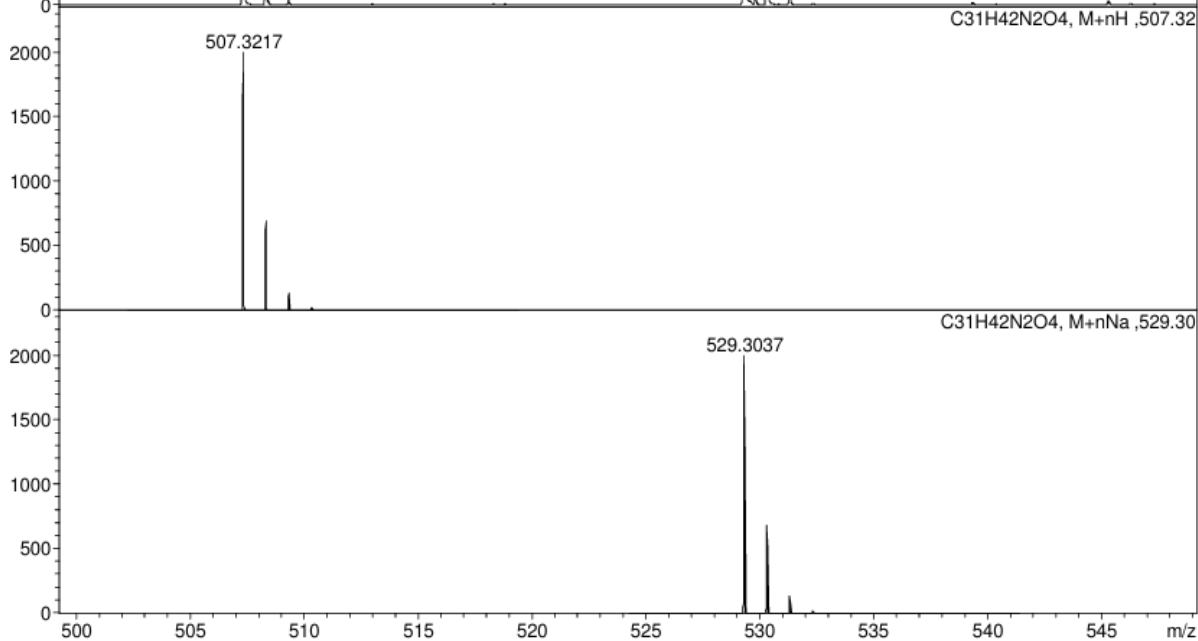

HRMS (ESI/Q-TOF) of 3-acetate 20-[3''-(5'-azepane)isoxazole]-pregn-5,16-dien-3 $\beta$ -ol-20-one (**7r**)

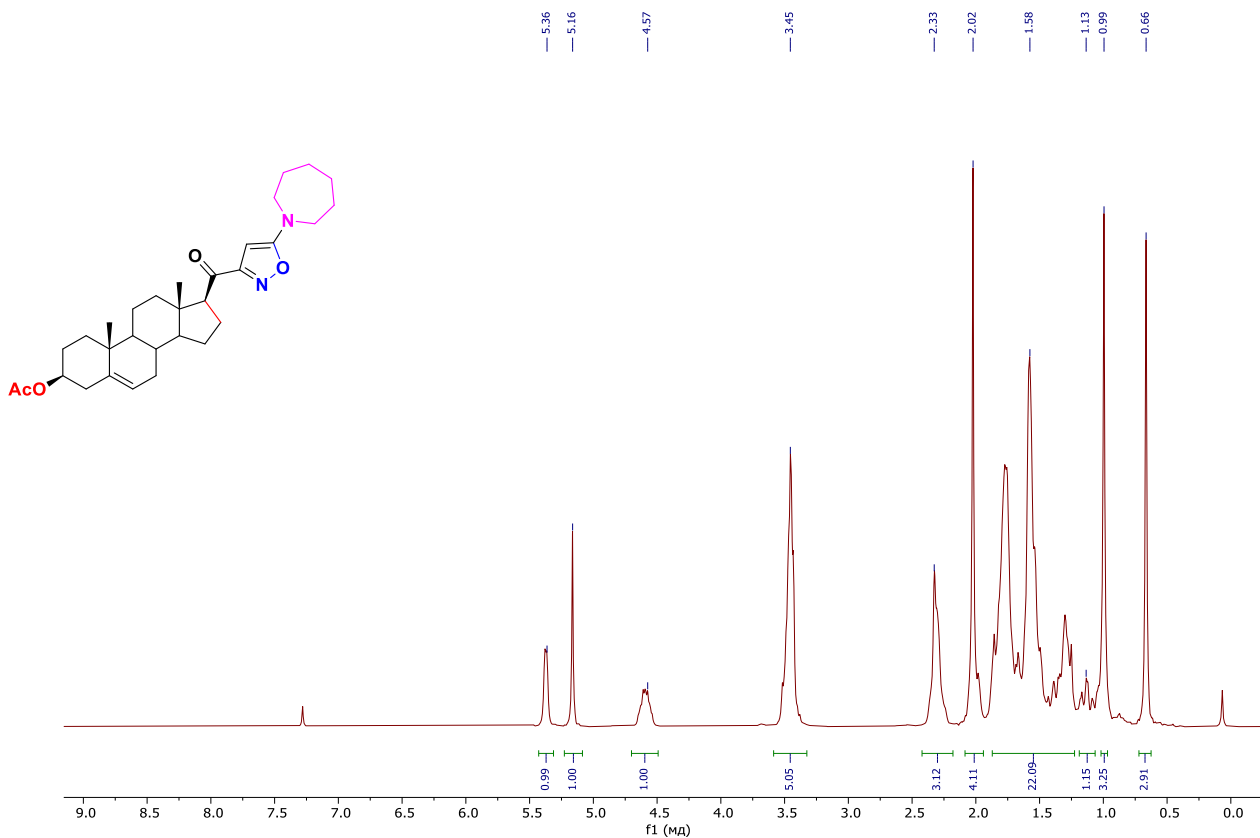

<sup>1</sup>H NMR (CDCl<sub>3</sub>, 300 MHz) spectrum of 3-acetate 20-(5'-azepanisoazole)-pregna-5-en-3β-ol-20-one (7s)

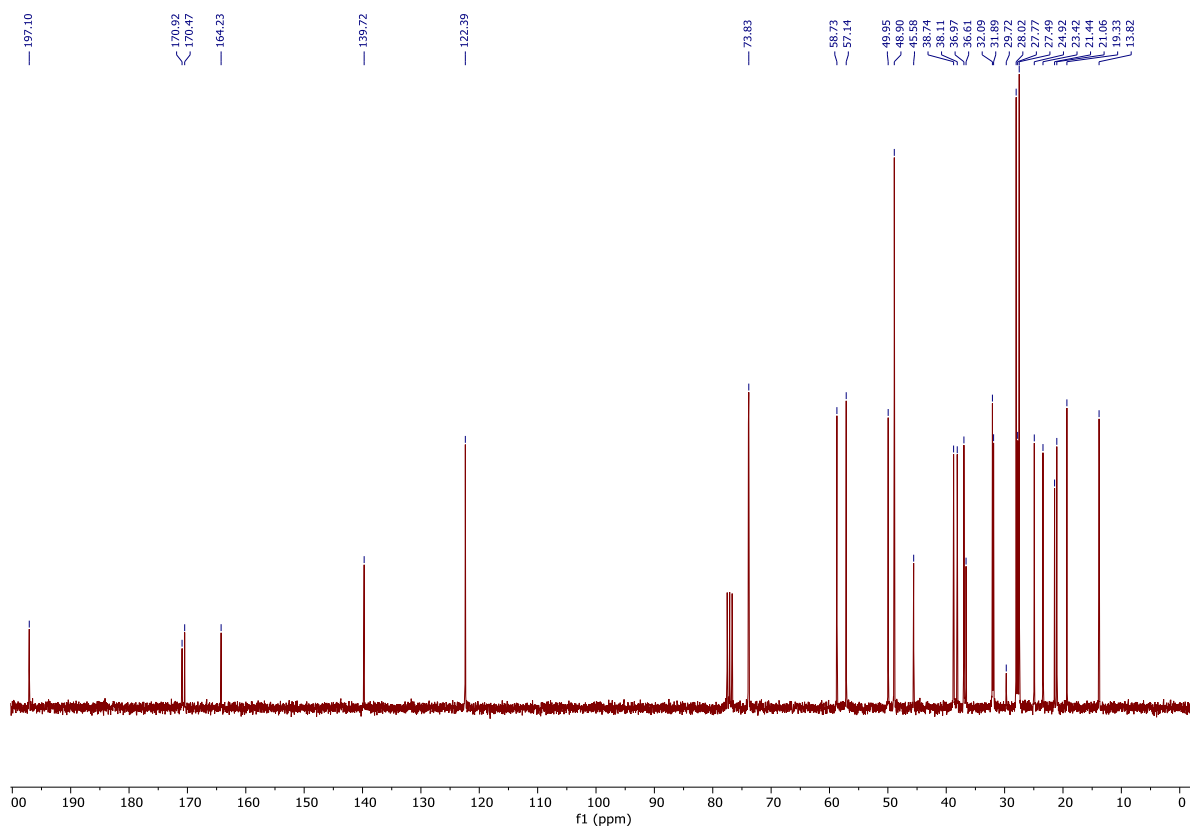

<sup>13</sup>C NMR (CDCl<sub>3</sub>, 75 MHz) spectrum of 3-acetate 20-(5'-azepanisoazole)-pregna-5-en-3β-ol-20-one (7s)

**Analysis Info**

Analysis Name D:\Data\Kolotyrkina\2023\Malahova\1207048.d  
Method tune\_low.m  
Sample Name /YUVA mavi-179f1  
Comment C31H42N2O4 mH 507.3217 calibrant added CH3OH

Acquisition Date 07.12.2023 19:27:02  
Operator BDAL@DE  
Instrument / Ser# micrOTOF 10248

**Acquisition Parameter**

|             |            |                      |          |                  |           |
|-------------|------------|----------------------|----------|------------------|-----------|
| Source Type | ESI        | Ion Polarity         | Positive | Set Nebulizer    | 0.4 Bar   |
| Focus       | Not active |                      |          | Set Dry Heater   | 180 °C    |
| Scan Begin  | 50 m/z     | Set Capillary        | 4500 V   | Set Dry Gas      | 4.0 l/min |
| Scan End    | 3000 m/z   | Set End Plate Offset | -500 V   | Set Divert Valve | Waste     |

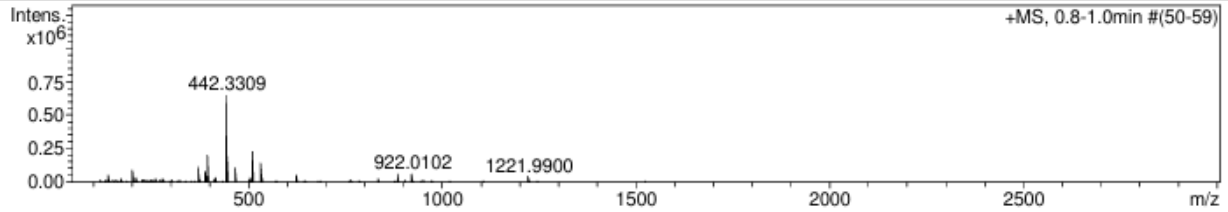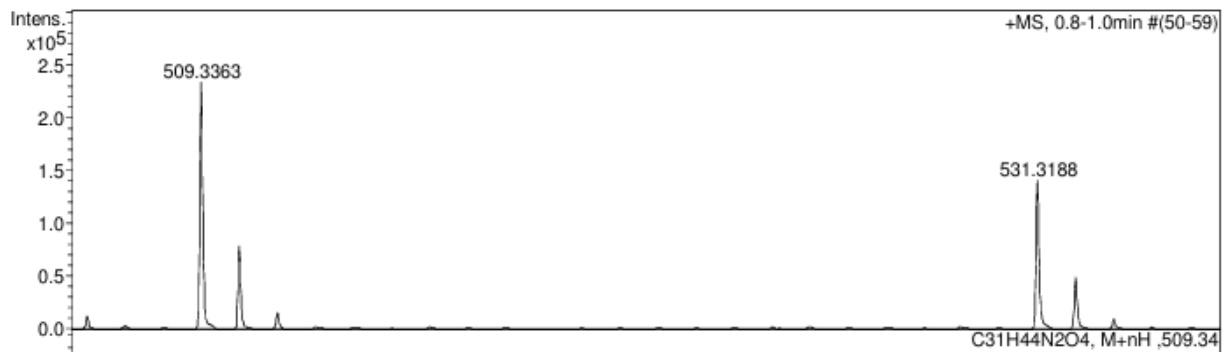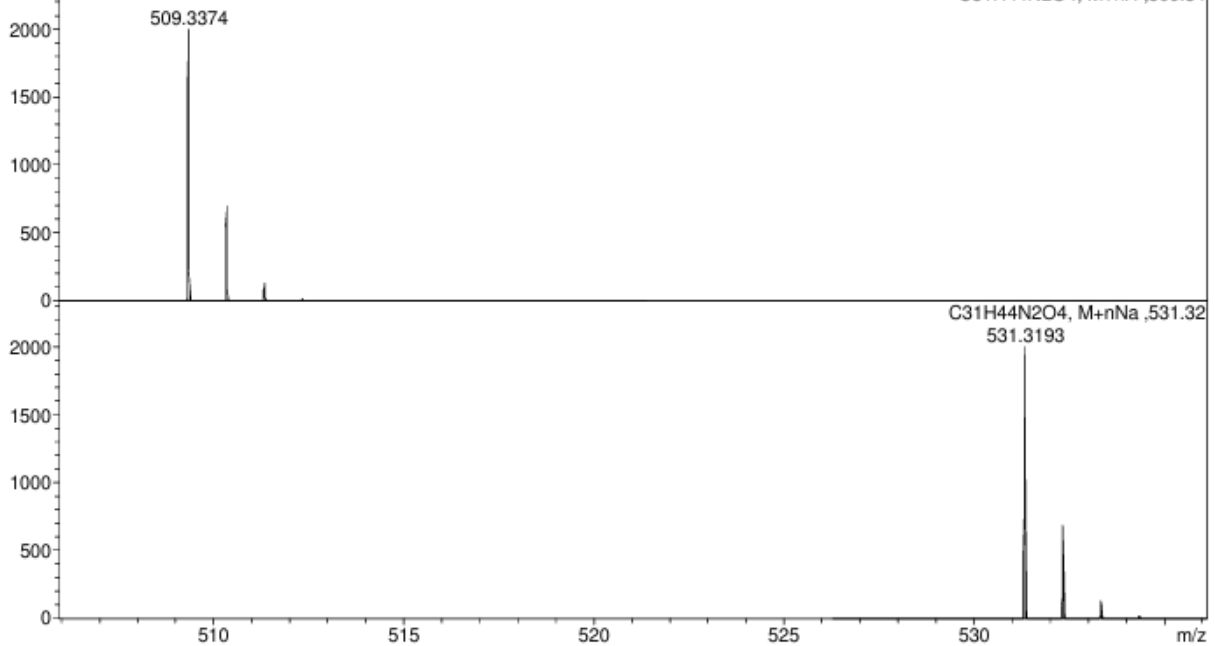

HRMS (ESI/Q-TOF) of 3-acetate 20-(5'-azepanisoazole)-pregna-5-en-3 $\beta$ -ol-20-one (**7s**)

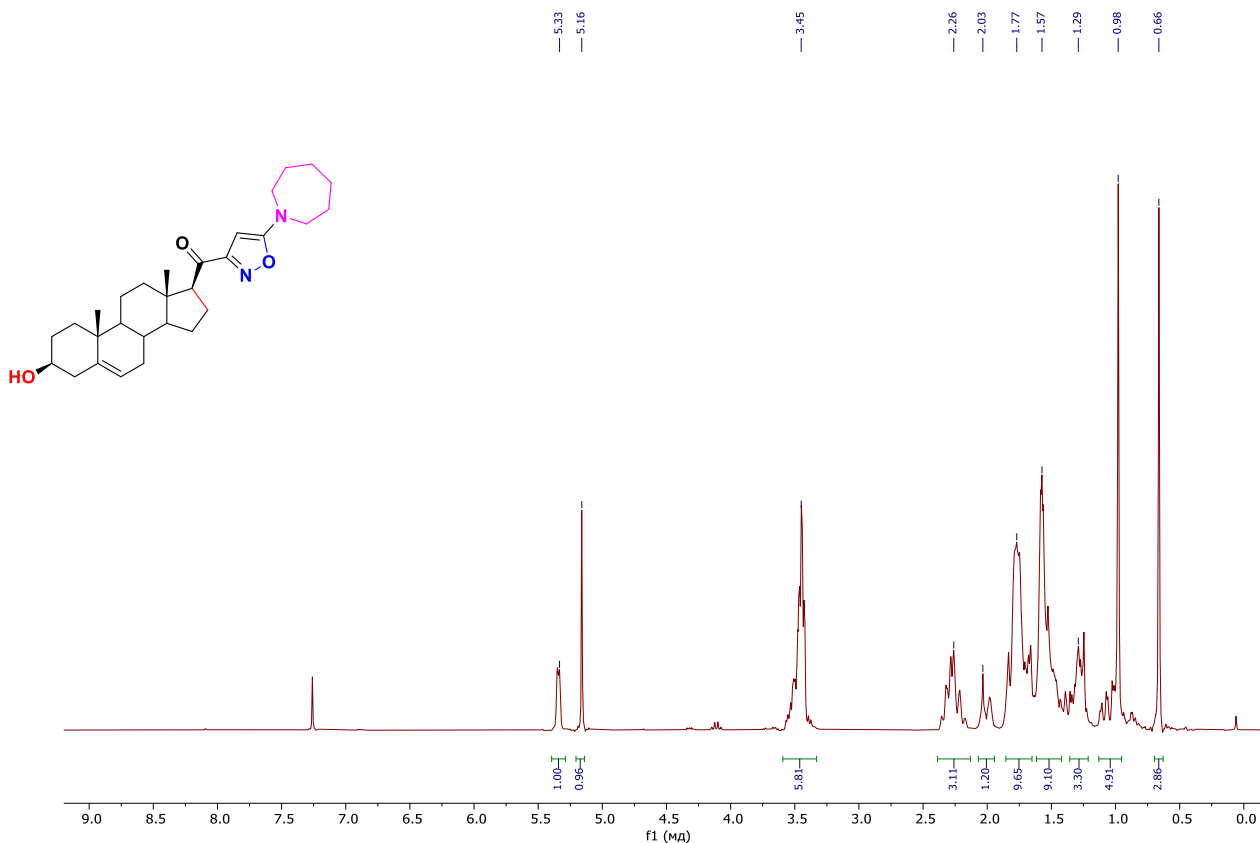

<sup>1</sup>H NMR (CDCl<sub>3</sub>, 300 MHz) spectrum of 20-[3'-(5''-azepane)isoxazole]-pregn-5-en-3β-ol-20-one (7t)

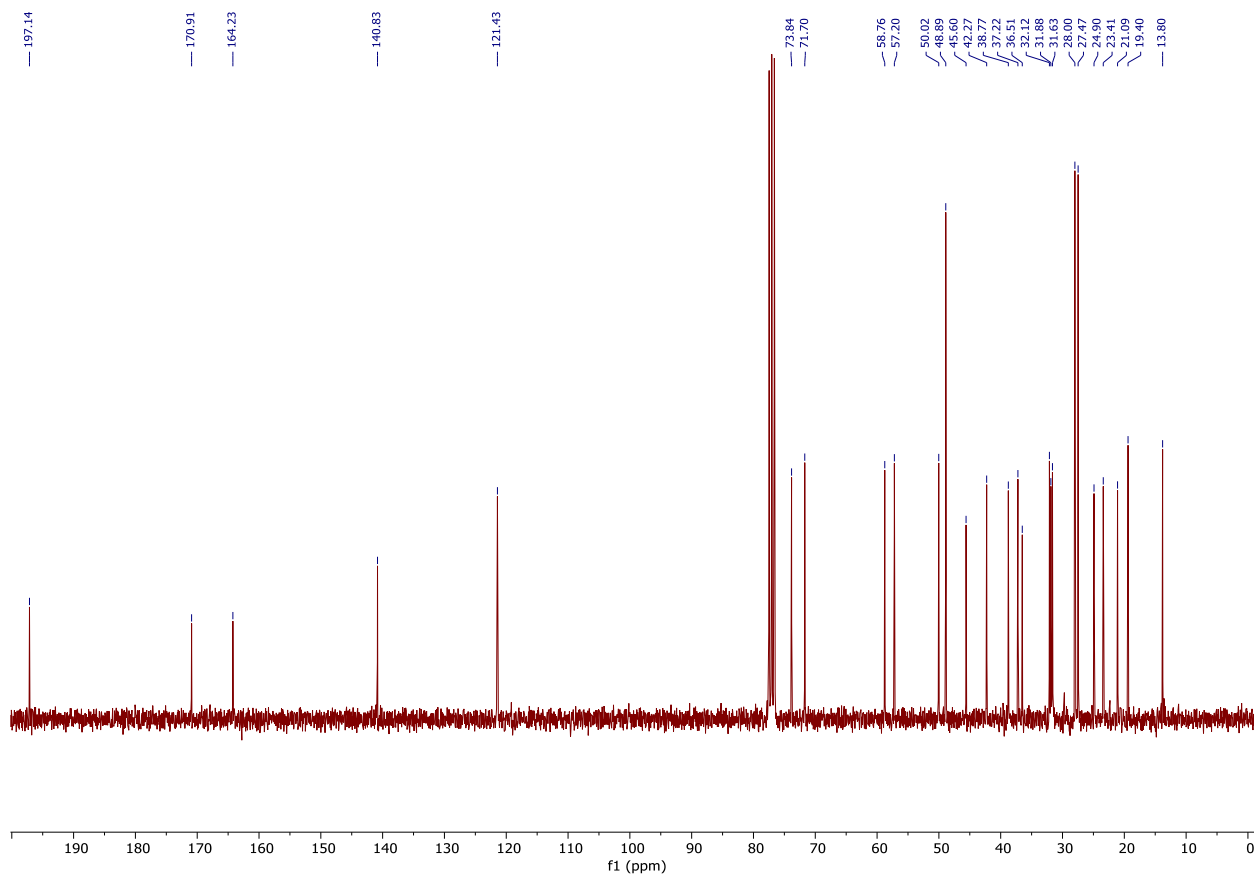

<sup>13</sup>C NMR (CDCl<sub>3</sub>, 75 MHz) spectrum of 20-[3'-(5''-azepane)isoxazole]-pregn-5-en-3β-ol-20-one (7t)

**Analysis Info**

Analysis Name D:\Data\Kolotyrkina\2024\Malahova\0403040.d  
Method tune\_low.m  
Sample Name /YUVA MaVi-198f1  
Comment C29H42N2O3 mH467.3268 calibrant added CH3OH

Acquisition Date 03.04.2024 19:15:13  
Operator BDAL@DE  
Instrument / Ser# micrOTOF 10248

**Acquisition Parameter**

|             |            |                      |          |                  |           |
|-------------|------------|----------------------|----------|------------------|-----------|
| Source Type | ESI        | Ion Polarity         | Positive | Set Nebulizer    | 0.4 Bar   |
| Focus       | Not active |                      |          | Set Dry Heater   | 180 °C    |
| Scan Begin  | 50 m/z     | Set Capillary        | 4500 V   | Set Dry Gas      | 4.0 l/min |
| Scan End    | 3000 m/z   | Set End Plate Offset | -500 V   | Set Divert Valve | Waste     |

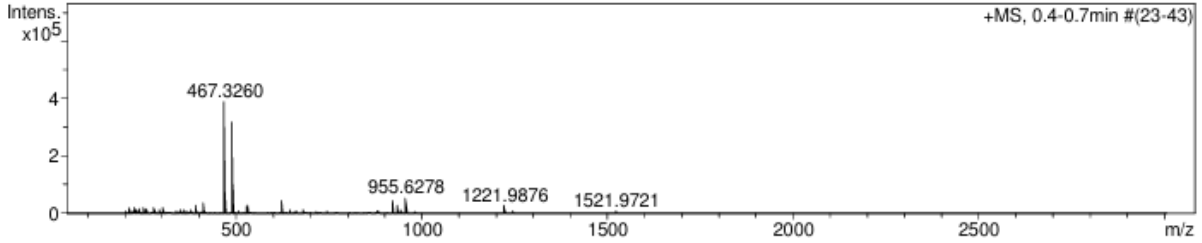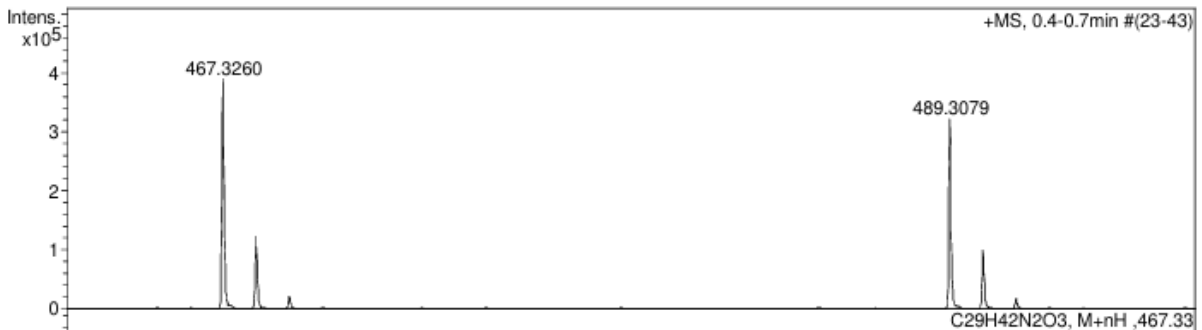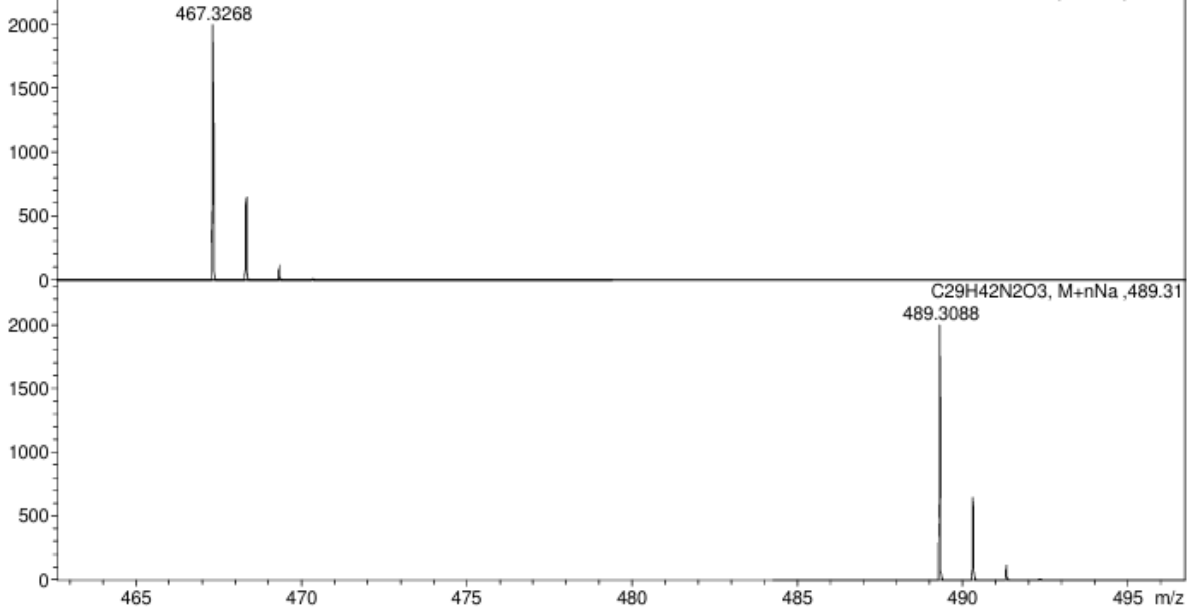

HRMS (ESI/Q-TOF) of 20-[3`-(5``-azepane)isoxazole]-pregn-5-en-3β-ol-20-one (7t)

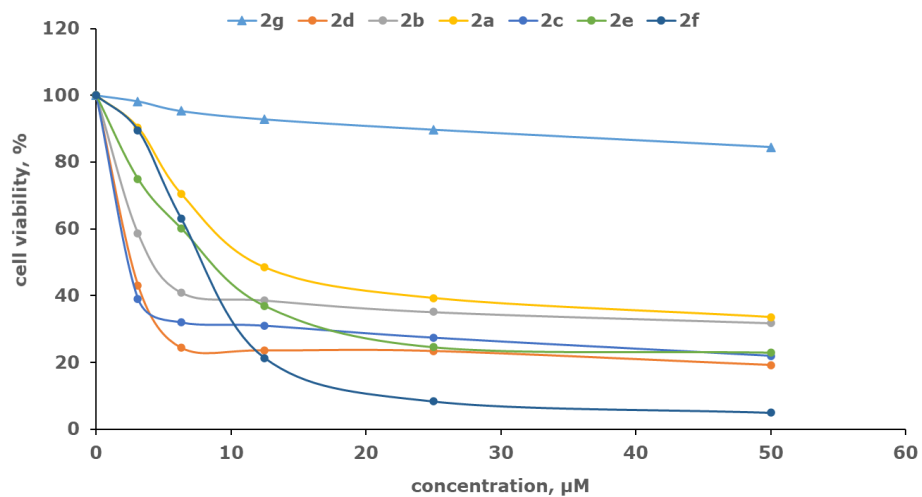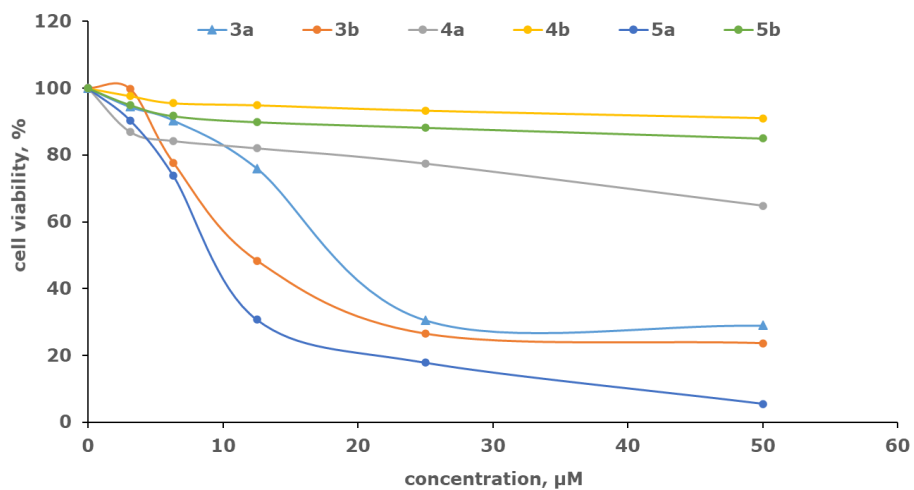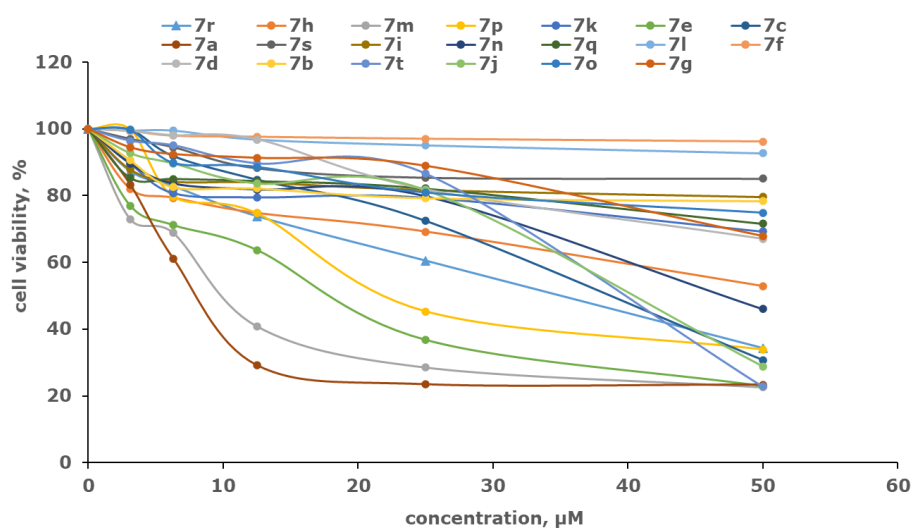

**Figure S1.** Antiproliferative activity of pregnenolone-isoxazole hybrids **2-5** and **7** against MCF7 breast cancer cells.

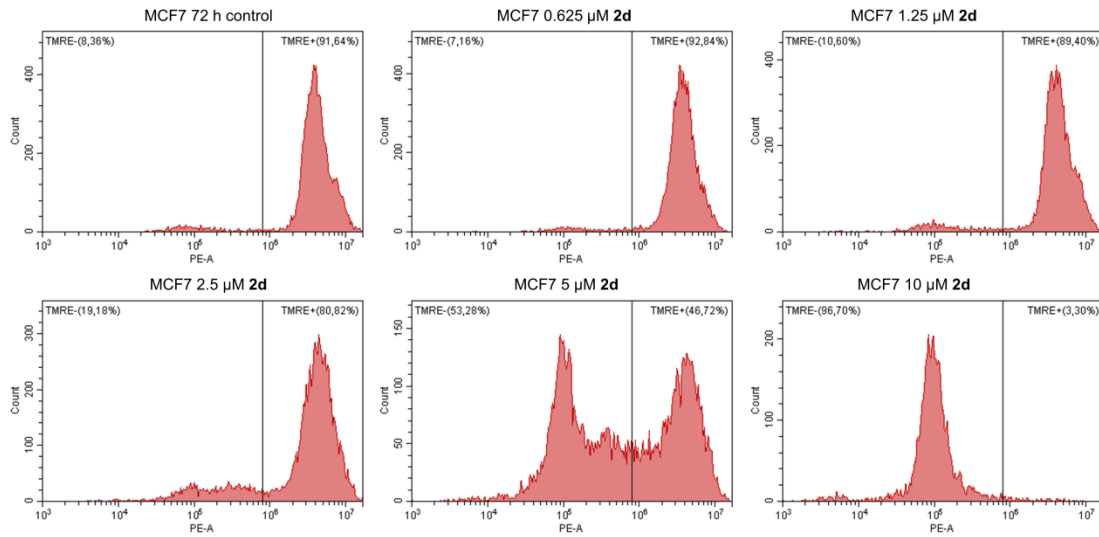

**Figure S2.** Representative flow cytometry histograms refer to Figure 4A.

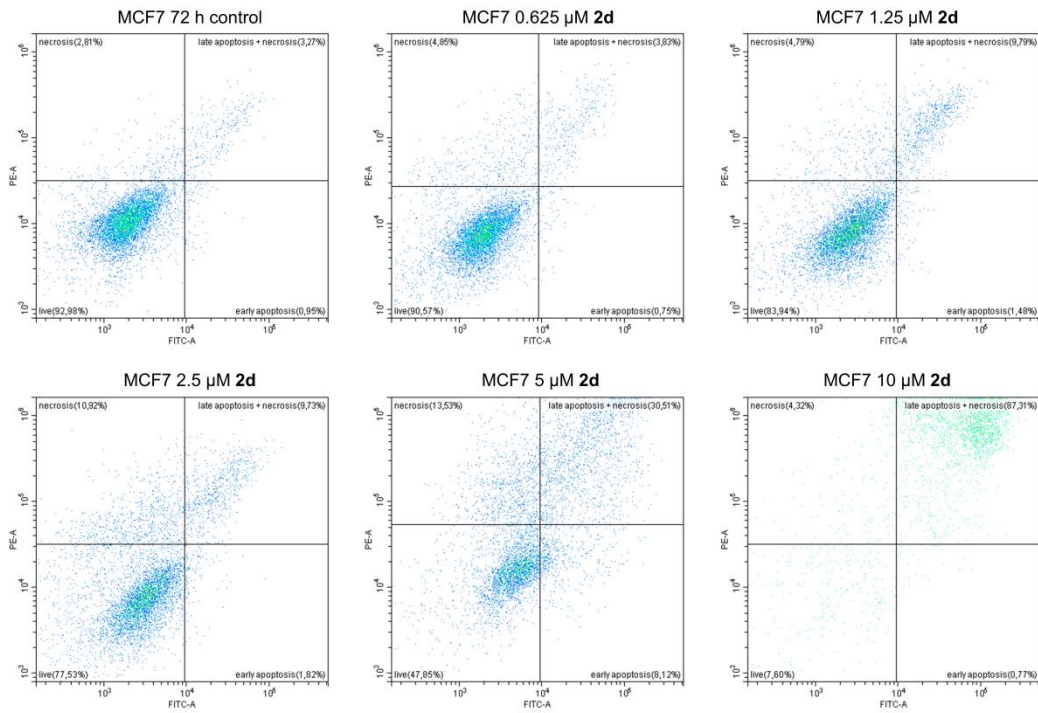

**Figure S3.** Representative flow cytometry histograms refer to Figure 4B.

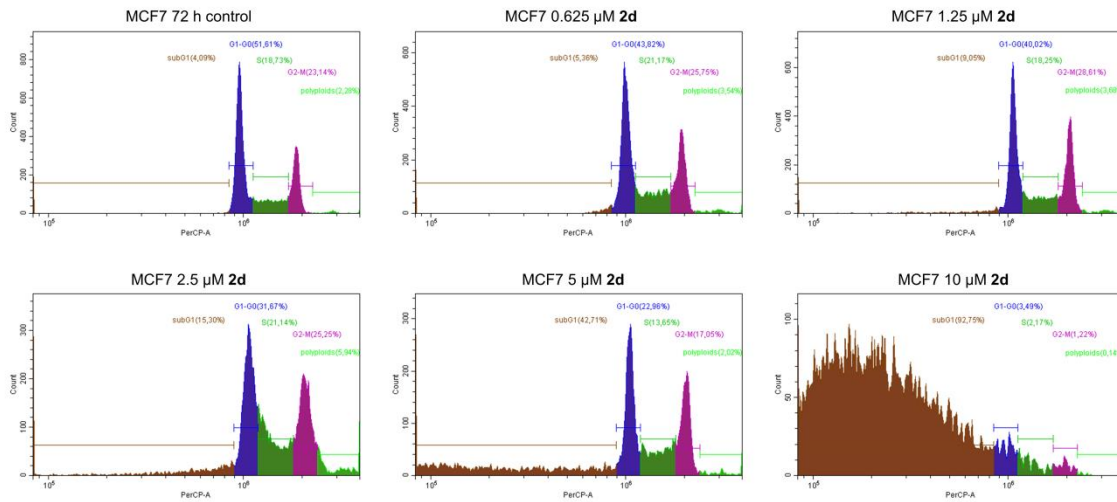

**Figure S4.** Representative flow cytometry histograms refer to Figure 4C.
